# Supplementary material for: Double dehydrogenative coupling of amino alcohols with primary alcohols under Mn(i) catalysis
Source: Royal Society of Chemistry journal article supplement (doi:10.1039/d4cc03595j), 2024-01-01

## Supporting Information:

### Double dehydrogenative coupling of amino alcohols with primary alcohols under Mn(I) catalysis

Ganesan Sivakumar, Abhijith Karattil Suresh, Smruti Rekha Padhy, and Ekambaram Balaraman\*

Department of Chemistry, Indian Institute of Science Education and Research (IISER) Tirupati, Tirupati – 517507, India. E-mail: eb.raman@iisertirupati.ac.in

#### Contents

|                                                                                     |         |
|-------------------------------------------------------------------------------------|---------|
| 1. General Information                                                              | S2      |
| 2. Experimental Section                                                             | S2-S6   |
| 3. H <sub>2</sub> Detection                                                         | S7      |
| 4. State-of-the-art: Synthesis of pyrroles <i>via</i> ADC approach                  | S8      |
| 5. Characterization of Products                                                     | S9-S19  |
| 6. References                                                                       | S20     |
| 7. Copy of Spectra ( <sup>1</sup> H, <sup>13</sup> C, <sup>19</sup> F NMR and FTIR) | S21-S54 |

## 1. General Information

All catalytic experiments were carried out using standard Schlenk techniques. All solvents were reagent grade or better. Deuterated solvents were used as received. Manganese salt precursors were used without additional purification. Most of the chemicals used in the catalytic reactions were purified according to standard procedure.<sup>S1</sup> Reactions were monitored using precoated Aluminium supported silica gel 60 F254 TLC (thin layer chromatography) plates (Merck) and are visualized by UV light at 254 nm or under iodine. The final product was purified using column chromatography (230-400 mesh silica gel purchased from Merck). <sup>1</sup>H NMR (400 MHz) and <sup>13</sup>C NMR (101 MHz) spectra were recorded on the Bruker AVANCE NEO 400 MHz spectrometer. Deuterated chloroform was used as solvents, and Chemical shifts ( $\delta$ ) for <sup>1</sup>H and <sup>13</sup>C-NMR spectra are given in ppm relative to tetramethylsilane (TMS) [ $\delta$  7.27 for <sup>1</sup>H (chloroform-d),  $\delta$  77.0 for <sup>13</sup>C (chloroform-d)]. Abbreviations used in the NMR follow-up experiments: br, broad; s, singlet; d, doublet; t, triplet; q, quartet; sep, septet; dd, doublet of doublet; m, multiplet. High-resolution mass spectra (HRMS) were obtained from Orbitrap Elite HybridIon Trap-Orbitrap (ThermoFischer scientific, Newington, NH, USA) Mass Spectrometer in electrospray ionization mode.

## 2. Experimental Section

### 2.1. General procedure for the synthesis of Mn-PNP complex

In a three-necked round-bottom flask (100 mL) under an argon atmosphere, Mn(CO)<sub>5</sub>Br (1.0 eq.) was suspended in toluene. Then, the PNP ligand (1.05 eq.) was added at room temperature. The resultant mixture was stirred for 10-15 minutes. After mixing, the reaction mixture was kept at 100°C for 16 h. After the completion of 16 h, the mixture was cooled down to room temperature, and the removal of the solvent under reduced pressure resulted in the formation of a yellow solid. Further washing of this solid with n-octane (3×10 mL) and drying under a high vacuum provide the corresponding manganese complex in 90% yield. The complex was characterized using <sup>1</sup>H and <sup>31</sup>P NMR spectroscopy, and the data obtained was well correlated with the literature reported once.<sup>S2</sup>

## 2.2 General procedure for the synthesis of amino alcohol

The compounds 1o, 1d, 1e, 1f, 1g, 1i, 1j, and 1k were synthesized by following the described procedure. The corresponding acetic acid was dissolved in dry THF (40 mL). A solution of LiAlH<sub>4</sub> in THF (1M, 60 mL) was added dropwise at 0 °C. The resulting mixture was allowed to come to room temperature and then stirred for 2 h. Hydrolyzation of the mixture was done by adding water (2.5 mL) and 5% NaOH (7.5 mL). The suspension was then filtered, and the resulting precipitate was washed with ethyl acetate. After evaporating the organic layer, the resulting residue was recrystallized from ethyl acetate and petroleum ether, and the corresponding amino alcohol was yielded quantitatively.

## 2.3. General Procedure for the Synthesis of Pyrrole

To a 15 mL clean, oven-dried screw cap reaction tube, [Mn]-1 catalyst (0.01 mmol, 2 mol%), Cs<sub>2</sub>CO<sub>3</sub> (0.05 mmol, 10 mol%), **1a** (0.5 mmol, 1 equiv.) and **2a** (0.75 mmol, 1.5 equiv.) were added under a gentle stream of argon. The reaction mixture was kept for stirring (gently) at 130 °C for 8 h. After the completion of 8 h, the crude mixture was cooled down to room temperature, and dichloromethane was used to make it completely dissolve. It was then filtered through a celite filter and again washed with dichloromethane, followed by the solvent was removed under vacuum. Finally, the residue was purified by silica gel column chromatography (230- 400 mesh size) using petroleum ether and ethyl acetate as an eluent system.

## 2.4. General Procedure for the Synthesis of Pyrazine

To a 15 mL clean, oven-dried screw cap reaction tube, [Mn]-1 catalyst (0.01 mmol, 2 mol%), KOH (0.1 mmol, 20 mol%), **1a** (0.5 mmol, 1 equiv.) were added under a gentle stream of argon. The reaction mixture was kept for stirring (gently) at 130 °C for 16 h. After completion of 16 h, the crude mixture was cooled down to room temperature and added dichloromethane to make it completely dissolve then filtered through celite filter and again washed with dichloromethane, followed by the solvent was removed under vacuum and finally, the residue was purified by silica gel column chromatography (230- 400 mesh size) using petroleum-ether and ethyl acetate as an eluent system.

## 2.5. Reaction Optimization

**Table S1:** Screening of catalyst and ligand.<sup>a</sup>

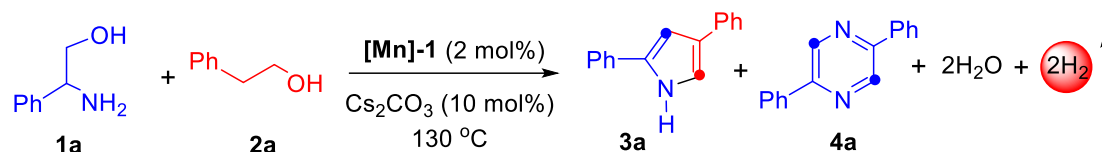

| Entry | Deviation from above                                                                          | <b>3a</b> Yield (%) <sup>b</sup> | <b>4a</b> Yield (%) <sup>b</sup> |
|-------|-----------------------------------------------------------------------------------------------|----------------------------------|----------------------------------|
| 1     | No Variation                                                                                  | 70                               | <5                               |
| 2     | <b>[Mn]-2</b> as a catalyst                                                                   | 63                               | <10                              |
| 3     | <b>[Mn]-3</b> as a catalyst                                                                   | 60                               | <10                              |
| 4     | $\text{Mn}(\text{CO})_5\text{Br}$ / <sup>Ph</sup> PNP-Ligand (1:1) ( <b>L</b> <sub>7</sub> )  | 57                               | <15                              |
| 5     | $\text{Mn}(\text{CO})_5\text{Br}$ / <sup>iPr</sup> PNP-Ligand (1:1) ( <b>L</b> <sub>8</sub> ) | 46                               | trace                            |
| 6     | $\text{Mn}(\text{CO})_5\text{Br}$ / <sup>Cy</sup> PNP-Ligand (1:1) ( <b>L</b> <sub>9</sub> )  | 43                               | trace                            |
| 7     | $\text{MnCl}_2$ / <sup>Ph</sup> PNP-Ligand (1:1) ( <b>L</b> <sub>7</sub> )                    | trace                            | -                                |
| 8     | <sup>Ph</sup> PNP-Ligand without Mn precursor                                                 | NR                               | NR                               |
| 9     | Mn precursor without <sup>Ph</sup> PNP-Ligand ( <b>L</b> <sub>7</sub> )                       | NR                               | NR                               |
| 10    | <b>L</b> <sub>1</sub> , <b>L</b> <sub>2</sub> , <b>L</b> <sub>3</sub>                         | nd                               | nd                               |
| 11    | <b>L</b> <sub>4</sub> , <b>L</b> <sub>5</sub> , <b>L</b> <sub>6</sub>                         | trace                            | trace                            |

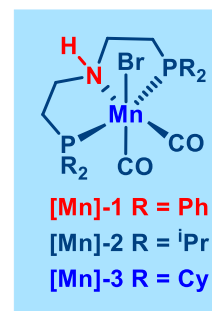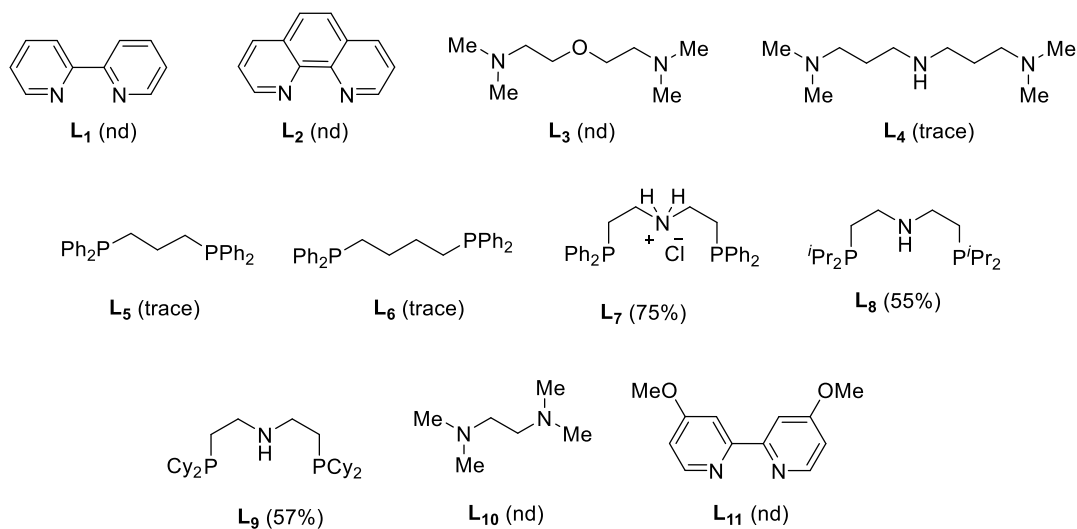

<sup>a</sup>Reaction Conditions: Substrate **1a** (0.5 mmol), **2a** (0.6 mmol), **[Mn]-1** (2 mol%), and  $\text{Cs}_2\text{CO}_3$  (10 mol%) were heated at 130 °C (silicone oil-bath temperature) for 8 h under an argon atmosphere. <sup>b</sup>Isolated yield.

**Table S2:** Screening of solvent.<sup>a</sup>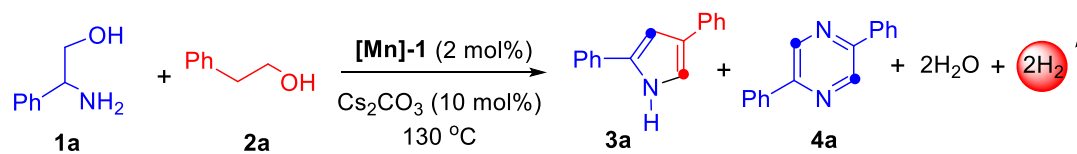

| Entry | Deviation from above | <b>3a</b> Yield (%) <sup>b</sup> | <b>4a</b> Yield (%) <sup>b</sup> |
|-------|----------------------|----------------------------------|----------------------------------|
| 1     | No Variation         | 70                               | <5                               |
| 2     | n-Octane             | 46                               | trace                            |
| 3     | 1,4 dioxane          | 48                               | trace                            |
| 4     | m-xylene             | 26                               | <5                               |
| 5     | THF                  | 30                               | trace                            |
| 6     | Mesitylene           | 28                               | trace                            |
| 7     | Toluene              | 32                               | <10                              |

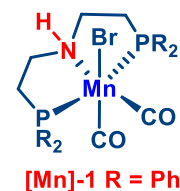

<sup>a</sup>Reaction Conditions: Substrate **1a** (0.5 mmol), **2a** (0.6 mmol), **[Mn]-1** (2 mol%) and  $\text{Cs}_2\text{CO}_3$  (10 mol%) were heated at 130 °C (silicone oil-bath temperature) for 8 h under an argon atmosphere. <sup>b</sup>Isolated yield.

**Table S3:** Screening of base.<sup>a</sup>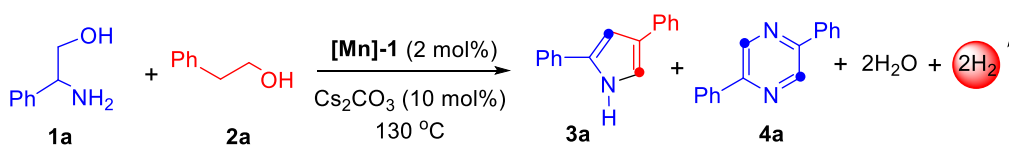

| Entry | Deviation from above                           | <b>3a</b> Yield (%) <sup>b</sup> | <b>4a</b> Yield (%) <sup>b</sup> |
|-------|------------------------------------------------|----------------------------------|----------------------------------|
| 1     | No Variation                                   | 70                               | <5                               |
| 2     | KOH                                            | 56                               | 30                               |
| 3     | NaOH                                           | 51                               | 22                               |
| 4     | KO <sup>t</sup> Bu                             | 46                               | 21                               |
| 5     | NaO <sup>t</sup> Bu                            | 43                               | 18                               |
| 6     | $\text{K}_2\text{CO}_3$                        | 58                               | trace                            |
| 7     | <b>[Mn]-1</b> without base                     | trace                            | -                                |
| 8     | $\text{Cs}_2\text{CO}_3$ without <b>[Mn]-1</b> | NR                               | -                                |

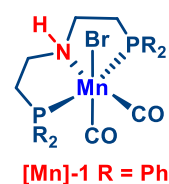

<sup>a</sup>Reaction Conditions: Substrate **1a** (0.5 mmol), **2a** (0.6 mmol), **[Mn]-1** (2 mol%) and Base (10 mol%) were heated at 130 °C (silicone oil-bath temperature) for 8 h under an argon atmosphere. <sup>b</sup>Isolated yield.

**Table S4:** Optimization for pyrazine.<sup>a</sup>

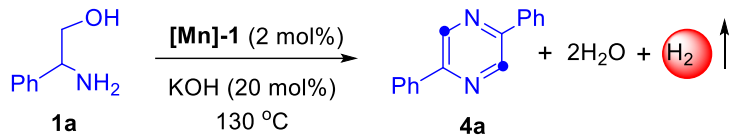

| Entry | Deviation from above        | Base                            | 4a Yield (%) <sup>b</sup> |
|-------|-----------------------------|---------------------------------|---------------------------|
| 1     | No Variation                | KOH                             | 80                        |
| 2     | <b>[Mn]-2</b> as a catalyst | KOH                             | 75                        |
| 3     | <b>[Mn]-3</b> as a catalyst | KOH                             | 72                        |
| 4     | [Mn]-1                      | NaOH                            | 75                        |
| 5     | [Mn]-1                      | KO <sup>t</sup> Bu              | 72                        |
| 6     | [Mn]-1                      | NaO <sup>t</sup> Bu             | 69                        |
| 7     | [Mn]-1                      | LiO <sup>t</sup> Bu             | 60                        |
| 8     | [Mn]-1                      | K <sub>2</sub> CO <sub>3</sub>  | 25                        |
| 9     | [Mn]-1                      | Cs <sub>2</sub> CO <sub>3</sub> | 30                        |
| 10    | [Mn]-1                      | -                               | 30                        |
| 11    | -                           | KOH                             | 30                        |

  
**[Mn]-1 R = Ph**

<sup>a</sup>Reaction Conditions: Substrate 1 (0.5 mmol), [Mn]-1 (2 mol%), and base (20 mol%) were heated at 130 °C (silicone oil-bath temperature) for 16 h under an argon atmosphere. <sup>b</sup>Isolated yields.

### 3. H<sub>2</sub> Detection

To a 15 mL clean, oven-dried screw cap with septa reaction tube, [Mn]-1 catalyst (0.01 mmol, 2 mol%), Cs<sub>2</sub>CO<sub>3</sub> (0.05 mmol, 10 mol%), **1a** (0.5 mmol, 1 equiv.) and **2a** (0.75 mmol, 1.5 equiv.) were added under a gentle stream of argon. The reaction mixture was kept for stirring (gently) at 130 °C (oil-bath temperature) for 1 h. After completion of the reaction, the crude mixture was cooled to room temperature, followed by the sample submitted to GC for detection of H<sub>2</sub> gas.

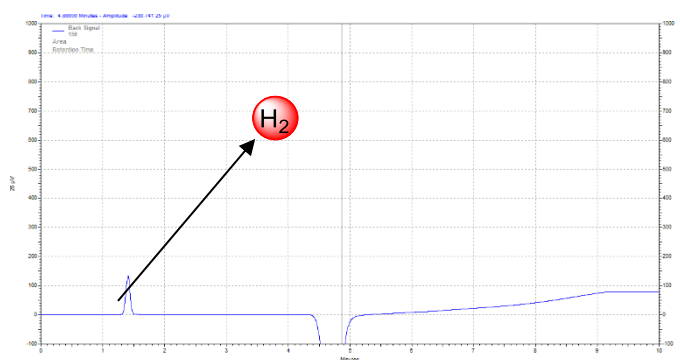

Gas chromatography analysis for the detection of hydrogen gas.

We have determined the formation of hydrogen gas (H<sub>2</sub>, m/z = 2) using an online MS with an OmniStar™ Gas Analysis System GSD 320 (Pfeiffer) quadrupole mass spectrometer apparatus.

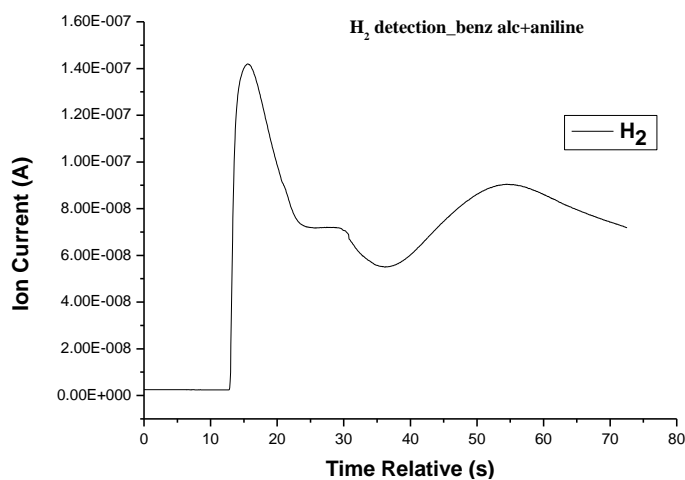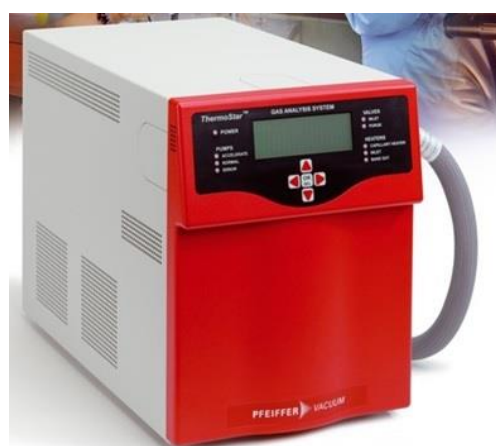

OmniStar™

Photograph of OmniStar™ Gas Analysis System GSD 320 (Pfeiffer) quadrupole mass spectrometer apparatus used for the analysis of gases based on following their masses.

## 4. State-of-the-art: Synthesis of pyrroles *via* ADC approach

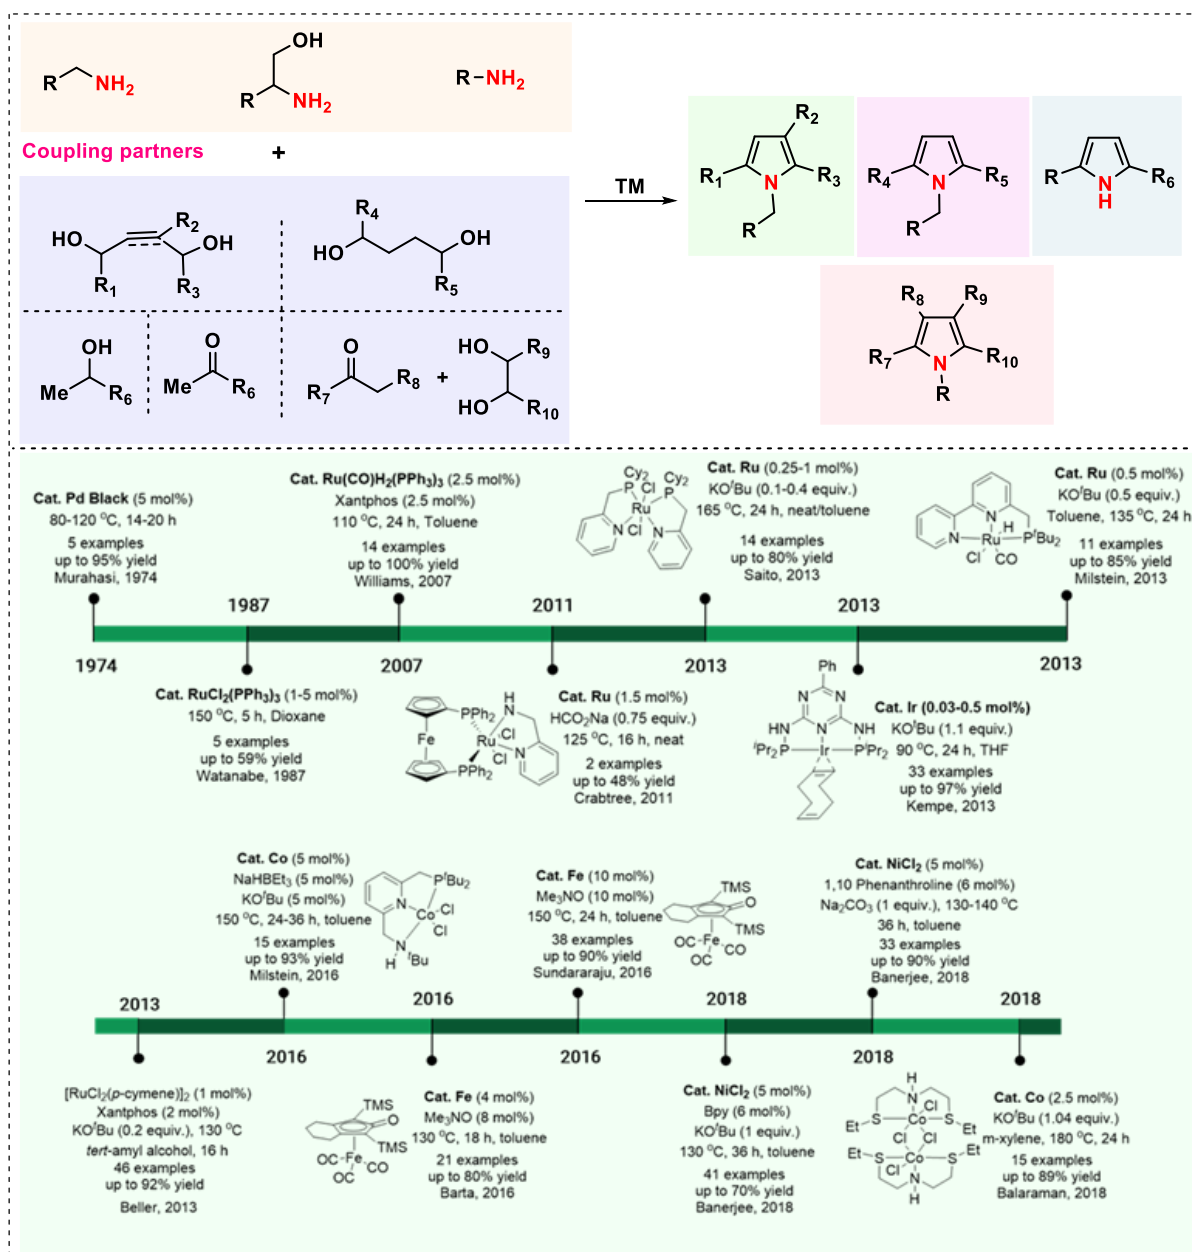



## 5. Characterization of products

### 2,4-diphenyl-1H-pyrrole (3a)

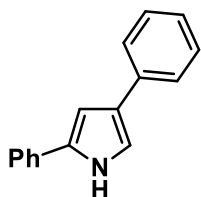

Viscous colourless liquid. Yield: 70%.  $^1\text{H}$  NMR (400 MHz,  $\text{CDCl}_3$ )  $\delta$  = 8.42 (s, 1H), 7.58 – 7.53 (m, 2H), 7.51 – 7.44 (m, 2H), 7.39 – 7.36 (m, 2H), 7.36 – 7.29 (m, 2H), 7.26 – 7.16 (m, 2H), 7.09 (dd,  $J$  = 2.7, 1.7 Hz, 1H), 6.82 (dd,  $J$  = 2.8, 1.7 Hz, 1H).  $^{13}\text{C}$  NMR (101 MHz,  $\text{CDCl}_3$ )  $\delta$  = 135.55, 133.10, 132.50, 128.99, 128.72, 126.59, 126.52, 125.79, 125.21, 123.89, 115.66, 103.97. HRMS (ESI):  $m/z$  Calcd for  $\text{C}_{16}\text{H}_{14}\text{N}$   $[\text{M}+\text{H}]^+$ : 220.1121; Found: 220.1126. Ref: M. Adib, N. Ayashi, F. Heidari and P. Mirzaei, *Synlett*, 2016, **27**, 1738–1742.

### 2-phenyl-4-(p-tolyl)-1H-pyrrole (3b)

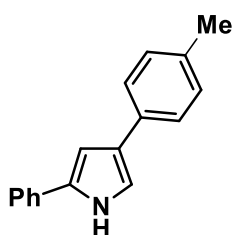

Viscous yellowish liquid. Yield: 74%.  $^1\text{H}$  NMR (400 MHz,  $\text{CDCl}_3$ )  $\delta$  = 8.44 (s, 1H), 7.56 – 7.46 (m, 2H), 7.43 – 7.33 (m, 4H), 7.27 – 7.21 (m, 2H), 7.12 (d,  $J$  = 1.3 Hz, 1H), 7.02 (d,  $J$  = 7.5 Hz, 1H), 6.82 (d,  $J$  = 1.7 Hz, 1H).  $^{13}\text{C}$  NMR (101 MHz,  $\text{CDCl}_3$ )  $\delta$  = 138.17, 135.44, 133.00, 132.55, 128.96, 128.59, 126.46, 126.00, 123.85, 122.33, 115.57, 104.07, 21.58. HRMS (ESI):  $m/z$  Calcd for  $\text{C}_{17}\text{H}_{16}\text{N}$   $[\text{M}+\text{H}]^+$ : 234.1277; Found: 234.1276. Ref: M. Adib, N. Ayashi, F. Heidari and P. Mirzaei, *Synlett*, 2016, **27**, 1738–1742.

### 2-phenyl-4-(m-tolyl)-1H-pyrrole (3c)

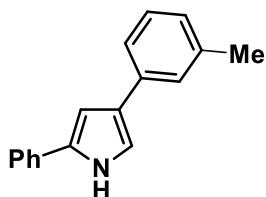

Viscous yellowish liquid. Yield: 70%.  $^1\text{H}$  NMR (400 MHz,  $\text{CDCl}_3$ )  $\delta$  = 8.37 (s, 1H), 7.50 – 7.45 (m, 3H), 7.45 (d,  $J$  = 1.9 Hz, 1H), 7.36 (dd,  $J$  = 8.5, 7.0 Hz, 2H), 7.24 – 7.19 (m, 1H), 7.16

(d,  $J = 7.9$  Hz, 2H), 7.06 – 7.05 (m, 1H), 6.80 – 6.79(m, 1H), 2.35 (s, 3H).  $^{13}\text{C}$  NMR (101 MHz,  $\text{CDCl}_3$ )  $\delta = 135.34, 132.96, 132.67, 132.56, 129.40, 129.40, 128.97, 128.97, 126.60, 126.45, 125.14, 123.85, 115.34, 103.95, 21.15$ . HRMS (ESI):  $m/z$  Calcd for  $\text{C}_{17}\text{H}_{16}\text{N}$   $[\text{M}+\text{H}]^+$ : 234.1277; Found: 234.1278. Ref: M. Adib, N. Ayashi, F. Heidari and P. Mirzaei, *Synlett*, 2016, **27**, 1738–1742.

### 2-phenyl-4-(*o*-tolyl)-1H-pyrrole (3d)

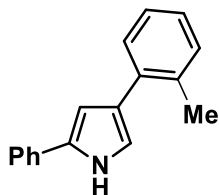

Viscous brown liquid. Yield: 73%.  $^1\text{H}$  NMR (400 MHz,  $\text{CDCl}_3$ )  $\delta = 8.46$  (s, 1H), 7.51 (dd,  $J = 8.3, 1.3$  Hz, 2H), 7.45 – 7.39 (m, 2H), 7.39 – 7.34 (m, 1H), 7.28 – 7.18 (m, 3H), 7.17 (td,  $J = 7.3, 1.7$  Hz, 1H), 6.93 (dd,  $J = 2.7, 1.7$  Hz, 1H), 6.69 (dd,  $J = 2.8, 1.7$  Hz, 1H), 2.47 (s, 3H).  $^{13}\text{C}$  NMR (101 MHz,  $\text{CDCl}_3$ )  $\delta = 135.54, 135.32, 132.60, 131.92, 130.61, 129.24, 128.97, 126.39, 126.17, 126.12, 125.86, 123.83, 117.73, 107.00, 21.44$ . HRMS (ESI):  $m/z$  Calcd for  $\text{C}_{17}\text{H}_{16}\text{N}$   $[\text{M}+\text{H}]^+$ : 234.1277; Found: 234.1276. Ref: X. Zhang, S. Zheng and S. Zhang, *RSC Adv.*, 2017, **7**, 54254–54257.

### 4-(4-methoxyphenyl)-2-phenyl-1H-pyrrole (3e)

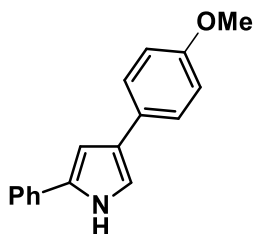

Viscous colourless liquid. Yield: 75%.  $^1\text{H}$  NMR (400 MHz,  $\text{CDCl}_3$ )  $\delta = 8.44$  (s, 1H), 7.52 – 7.49 (m, 3H), 7.43 – 7.35 (m, 3H), 7.25 – 7.19 (m, 1H), 7.06 (t,  $J = 2.2$  Hz, 1H), 6.94 – 6.89 (m, 2H), 6.76 (dd,  $J = 2.8, 1.7$  Hz, 1H), 3.83 (s, 3H).  $^{13}\text{C}$  NMR (101 MHz,  $\text{CDCl}_3$ )  $\delta = 157.94, 132.96, 132.59, 128.94, 128.68, 127.20, 126.42, 126.32, 123.85, 114.82, 114.12, 103.89, 55.34$ . HRMS (ESI):  $m/z$  Calcd for  $\text{C}_{17}\text{H}_{15}\text{NO}$   $[\text{M}+\text{Na}]^+$ : 272.1051; Found: 272.1072. FTIR: N-H ( $3317.72\text{ cm}^{-1}$ ), C-H stretching ( $2944.74\text{ cm}^{-1}, 2833.43\text{ cm}^{-1}$ ), C=C ( $1694.32\text{ cm}^{-1}, 1512\text{ cm}^{-1}$ ),

C-O (1252.27  $\text{cm}^{-1}$ ), C-N (1021.94  $\text{cm}^{-1}$ ), C-H bending (614.56  $\text{cm}^{-1}$ ). Ref : M. Adib, N. Ayashi, F. Heidari and P. Mirzaei, *Synlett*, 2016, **27**, 1738–1742.

#### 4-(3-methoxyphenyl)-2-phenyl-1H-pyrrole (3f)

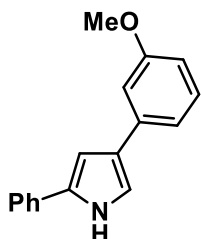

Viscous colourless liquid. Yield: 73%.  $^1\text{H}$  NMR (400 MHz,  $\text{CDCl}_3$ )  $\delta$  = 8.47 (s, 1H), 7.54 – 7.49 (m, 2H), 7.39 (t,  $J$  = 7.8 Hz, 2H), 7.31 – 7.26 (m, 1H), 7.23 (d,  $J$  = 7.4 Hz, 1H), 7.18 (s, 1H), 7.16 – 7.09 (m, 2H), 6.83 – 6.79 (m, 1H), 6.79 – 6.74 (m, 1H), 3.86 (s, 3H).  $^{13}\text{C}$  NMR (101 MHz,  $\text{CDCl}_3$ )  $\delta$  = 159.96, 136.99, 133.08, 132.47, 129.64, 128.97, 128.97, 126.54, 123.89, 117.88, 115.75, 111.13, 110.96, 104.11, 55.26. HRMS (ESI):  $m/z$  Calcd for  $\text{C}_{17}\text{H}_{15}\text{NO}$   $[\text{M}+\text{H}]^+$ : 250.1232; Found: 250.1223. FTIR: N-H (3333.05  $\text{cm}^{-1}$ ), C-H stretching (2942.91  $\text{cm}^{-1}$ , 2834.14  $\text{cm}^{-1}$ ), C=C (1686.54  $\text{cm}^{-1}$ , 1605  $\text{cm}^{-1}$ ), C-O (1287.58  $\text{cm}^{-1}$ ), C-N (1022.40  $\text{cm}^{-1}$ ), C-H bending (763.48  $\text{cm}^{-1}$ , 692.73  $\text{cm}^{-1}$ )

#### 4-(3,4-dimethoxyphenyl)-2-phenyl-1H-pyrrole (3g)

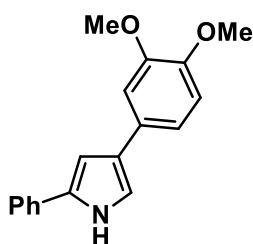

Viscous colourless liquid. Yield: 71%.  $^1\text{H}$  NMR (400 MHz,  $\text{CDCl}_3$ )  $\delta$  = 8.46 (s, 1H), 7.55 – 7.48 (m, 2H), 7.38 (m, 2H), 7.25 – 7.19 (m, 1H), 7.15 – 7.04 (m, 3H), 6.89 (d,  $J$  = 8.2 Hz, 1H), 6.76 (dd,  $J$  = 2.8, 1.7 Hz, 1H), 3.94 (s, 3H), 3.90 (s, 3H).  $^{13}\text{C}$  NMR (101 MHz,  $\text{CDCl}_3$ )  $\delta$  = 149.13, 147.45, 133.02, 132.53, 128.96, 128.83, 126.60, 126.48, 123.86, 117.50, 115.01, 111.66, 109.01, 103.98, 56.01, 55.91. HRMS (ESI):  $m/z$  Calcd for  $\text{C}_{18}\text{H}_{17}\text{NO}_2$   $[\text{M}+\text{Na}]^+$ : 302.1157; Found: 302.1154. FTIR: N-H (3325.50  $\text{cm}^{-1}$ ), C-H stretching (2943.89  $\text{cm}^{-1}$ , 2832.74  $\text{cm}^{-1}$ ), C=C (1671.32  $\text{cm}^{-1}$ ), C-O (1251.22  $\text{cm}^{-1}$ ), C-N (1021.50  $\text{cm}^{-1}$ ), C-H bending (628.49  $\text{cm}^{-1}$ )

#### 4-(4-fluorophenyl)-2-phenyl-1H-pyrrole (3h)

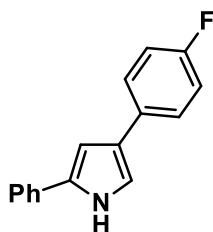

Viscous brown liquid. Yield: 78%.  $^1\text{H}$  NMR (400 MHz,  $\text{CDCl}_3$ )  $\delta$  = 8.44 (s, 1H), 7.52 – 7.49 (m, 4H), 7.40 – 7.36 (m, 2H), 7.28 – 7.21 (m, 1H), 7.09 – 7.00 (m, 3H), 6.76 (dd,  $J$  = 2.8, 1.7 Hz, 1H).  $^{13}\text{C}$  NMR (101 MHz,  $\text{CDCl}_3$ )  $\delta$  = 162.59, 160.16, 133.22, 132.40, 131.72, 131.69 (F-coupling), 129.04, 129.00, 126.64, 126.62, 126.56, 125.76 (F-coupling), 123.90, 115.57, 115.36, 115.29 (F-coupling), 103.94.  $^{19}\text{F}$  NMR (377 MHz,  $\text{CD}_2\text{Cl}_2$ )  $\delta$  -118.32, -118.33. HRMS (ESI):  $m/z$  Calcd for  $\text{C}_{16}\text{H}_{13}\text{FN}$   $[\text{M}+\text{H}]^+$ : 238.1027; Found: 238.1026. FTIR: N-H ( $3326.24\text{ cm}^{-1}$ ), C-H stretching ( $2944.13$ ,  $2832.39\text{ cm}^{-1}$ ), C=C ( $1449.14\text{ cm}^{-1}$ ), C-N ( $1114.22\text{ cm}^{-1}$ ), C-H bending ( $634.64\text{ cm}^{-1}$ ). Ref: M. Adib, N. Ayashi, F. Heidari and P. Mirzaei, *Synlett*, 2016, **27**, 1738–1742.

#### 4-(2-fluorophenyl)-2-phenyl-1H-pyrrole (3i)

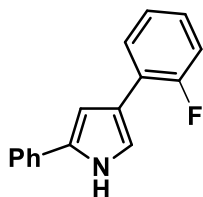

Viscous yellowish liquid. Yield: 71%.  $^1\text{H}$  NMR (400 MHz,  $\text{CDCl}_3$ )  $\delta$  = 8.48 (s, 1H), 7.65 – 7.57 (m, 1H), 7.52 – 7.46 (m, 2H), 7.37 (dd,  $J$  = 8.5, 7.0 Hz, 2H), 7.29 – 7.28 (m, 1H), 7.26 – 7.18 (m, 1H), 7.18 – 7.03 (m, 3H), 6.90 – 6.88 (m, 1H).  $^{13}\text{C}$  NMR (101 MHz,  $\text{CDCl}_3$ )  $\delta$  = 160.95, 158.50, 132.56, 132.36, 129.00, 127.77, 127.72 (F-Coupling), 126.73, 126.64, 126.61 (F-Coupling), 124.23, 124.20 (F-Coupling), 123.95, 123.20, 123.06, 119.89, 119.87 (F-Coupling), 118.76, 118.66 (F-Coupling), 116.10, 115.88, 104.82, 104.80,  $^{19}\text{F}$  NMR (377 MHz, Chloroform-*d*)  $\delta$  -115.07. HRMS (ESI):  $m/z$  Calcd for  $\text{C}_{16}\text{H}_{13}\text{FN}$   $[\text{M}+\text{H}]^+$ : 238.1027; Found: 238.1023. FTIR: N-H ( $3326.24\text{ cm}^{-1}$ ), C-H stretching ( $2944.13$ ,  $2832.39\text{ cm}^{-1}$ ), C=C ( $1449.14\text{ cm}^{-1}$ ), C-N ( $1114.22\text{ cm}^{-1}$ ), C-H bending ( $634.64\text{ cm}^{-1}$ ).

#### 4-(4-chlorophenyl)-2-phenyl-1H-pyrrole (3j)

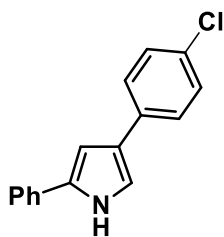

Viscous colourless liquid. Yield: 80%.  $^1\text{H}$  NMR (400 MHz,  $\text{CDCl}_3$ )  $\delta$  = 8.47 (s, 1H), 7.51 - 7.46 (m, 4H), 7.41 - 7.37 (m, 2H), 7.34 - 7.29 (m, 2H), 7.27 - 7.21 (m, 1H), 7.11 (s, 1H), 6.78 (s, 1H).  $^{13}\text{C}$  NMR (101 MHz,  $\text{CDCl}_3$ )  $\delta$  = 134.06, 133.36, 132.30, 131.23, 129.02, 128.77, 126.70, 126.36, 125.51, 123.92, 115.64, 103.84. HRMS (ESI):  $m/z$  Calcd for  $\text{C}_{16}\text{H}_{13}\text{NCl}$   $[\text{M}+\text{H}]^+$ : 254.0731; Found: 254.0733. Ref : M. Adib, N. Ayashi, F. Heidari and P. Mirzaei, *Synlett*, 2016, **27**, 1738–1742.

#### 4-(2-chlorophenyl)-2-phenyl-1H-pyrrole (3k)

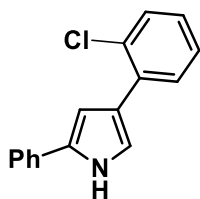

Viscous colourless liquid. Yield: 78%.  $^1\text{H}$  NMR (400 MHz, Chloroform-*d*)  $\delta$  8.45 (s, 1H), 7.54 - 7.52 (m, 1H), 7.48 (dd,  $J$  = 7.5, 2.0 Hz, 2H), 7.44 - 7.34 (m, 3H), 7.30 - 7.20 (m, 2H), 7.15 (d,  $J$  = 7.7 Hz, 1H), 7.10 - 7.08 (m, 1H), 6.78 (q,  $J$  = 2.2 Hz, 1H).  $^{13}\text{C}$  NMR (101 MHz,  $\text{CDCl}_3$ )  $\delta$  = 137.44, 134.55, 133.38, 132.24, 129.91, 129.03, 126.73, 125.64, 125.31, 125.16, 123.92, 123.21, 116.00, 103.87. HRMS (ESI):  $m/z$  Calcd for  $\text{C}_{16}\text{H}_{13}\text{NCl}$   $[\text{M}+\text{H}]^+$ : 254.0731; Found: 254.0731.

#### 4-(4-bromophenyl)-2-phenyl-1H-pyrrole (3l)

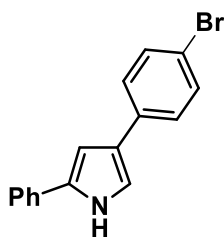

Viscous yellowish liquid. Yield: 72%.  $^1\text{H}$  NMR (400 MHz,  $\text{CDCl}_3$ )  $\delta$  = 8.49 (s, 1H), 7.53 – 7.49 (m, 2H), 7.49 – 7.41 (m, 4H), 7.41 – 7.38 (m, 1H), 7.28 – 7.21 (m, 2H), 7.13 (dd,  $J$  = 2.7, 1.7 Hz, 1H), 6.78 (dd,  $J$  = 2.8, 1.7 Hz, 1H).  $^{13}\text{C}$  NMR (101 MHz,  $\text{CDCl}_3$ )  $\delta$  = 134.51, 133.39, 132.29, 131.69, 129.01, 126.73, 126.71, 125.52, 123.93, 119.21, 115.64, 103.81. HRMS (ESI):  $m/z$  Calcd for  $\text{C}_{16}\text{H}_{13}\text{NBr}$   $[\text{M}+\text{H}]^+$ : 298.0226; Found: 254.0231.

(Ref : M. Adib, N. Ayashi, F. Heidari and P. Mirzaei, *Synlett*, 2016, **27**, 1738–1742)

#### 4-(naphthalen-1-yl)-2-phenyl-1H-pyrrole (3m)

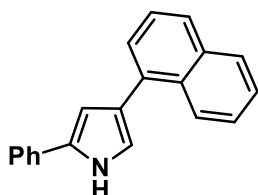

Viscous colourless liquid. Yield: 72%.  $^1\text{H}$  NMR (400 MHz,  $\text{CDCl}_3$ )  $\delta$  = 8.53 (s, 1H), 8.43 – 8.34 (m, 1H), 7.91 – 7.85 (m, 1H), 7.79 – 7.77 (m, 1H), 7.55 – 7.52 (m, 3H), 7.51 – 7.44 (m, 3H), 7.41 – 7.37 (m,  $J$  = 7.8 Hz, 2H), 7.27 – 7.21 (m, 1H), 7.05 (dd,  $J$  = 2.6, 1.6 Hz, 1H), 6.82 (dd,  $J$  = 2.9, 1.6 Hz, 1H).  $^{13}\text{C}$  NMR (101 MHz,  $\text{CDCl}_3$ )  $\delta$  = 134.39, 134.03, 132.57, 132.29, 131.96, 129.03, 128.33, 126.75, 126.50, 126.28, 125.81, 125.65, 125.62, 125.17, 123.90, 123.90, 118.24, 107.92. HRMS (ESI):  $m/z$  Calcd for  $\text{C}_{20}\text{H}_{15}\text{N}$   $[\text{M}+\text{H}]^+$ : 270.1283; Found: 270.1275. FTIR: N-H ( $3326.75\text{ cm}^{-1}$ ), C-H stretching ( $3005.61\text{ cm}^{-1}$ ), C=C ( $1685.81\text{ cm}^{-1}$ ,  $1449.50\text{ cm}^{-1}$ ), C-N ( $1017.22\text{ cm}^{-1}$ ), C-H bending ( $760.20\text{ cm}^{-1}$ ,  $694.46\text{ cm}^{-1}$ ).

#### 4-(naphthalen-2-yl)-2-phenyl-1H-pyrrole (3n)

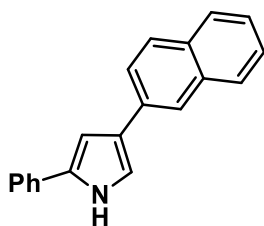

Viscous colourless liquid. Yield: 70%.  $^1\text{H}$  NMR (400 MHz,  $\text{CDCl}_3$ )  $\delta$  = 8.52 (s, 1H), 8.00 (d,  $J$  = 1.7 Hz, 1H), 7.84 – 7.80 (m, 3H), 7.73 (dd,  $J$  = 8.5, 1.8 Hz, 1H), 7.59 – 7.52 (m, 2H), 7.47 (dd,  $J$  = 6.8, 1.3 Hz, 1H), 7.44 – 7.37 (m, 3H), 7.29 – 7.26 (m, 1H), 7.26 – 7.24 (m, 1H), 6.97 (dd,  $J$  = 2.7, 1.7 Hz, 1H).  $^{13}\text{C}$  NMR (101 MHz,  $\text{CDCl}_3$ )  $\delta$  = 134.00, 133.35, 132.93, 132.47, 132.08, 129.00, 129.00, 128.19, 127.70, 127.67, 126.60, 126.10, 124.99, 124.51, 123.93, 122.70, 116.01, 104.12. HRMS (ESI):  $m/z$  Calcd for  $\text{C}_{20}\text{H}_{15}\text{N}$   $[\text{M}+\text{H}]^+$ : 270.1283; Found:

270.1277. FTIR: N-H (3326.70  $\text{cm}^{-1}$ ), C-H stretching (2944.60, 2832.76  $\text{cm}^{-1}$ ), C=C (1687.09  $\text{cm}^{-1}$ , 1449.60  $\text{cm}^{-1}$ ), C-N (1021.10  $\text{cm}^{-1}$ ), C-H bending (776.86  $\text{cm}^{-1}$ , 641.74  $\text{cm}^{-1}$ ).

### 2-phenyl-4-(4-(trifluoromethyl)phenyl)-1H-pyrrole (3o)

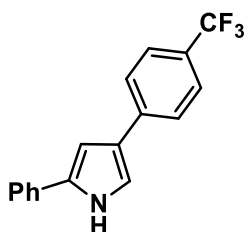

Viscous brown liquid. Yield: 70%.  $^1\text{H}$  NMR (400 MHz,  $\text{CDCl}_3$ )  $\delta$  = 8.55 (s, 1H), 7.67 – 7.63 (m, 2H), 7.62 – 7.57 (m, 2H), 7.54 – 7.49 (m, 2H), 7.44 – 7.36 (m, 2H), 7.29 – 7.25 (m, 1H), 7.21 (dd,  $J$  = 2.8, 1.7 Hz, 1H), 6.84 (dd,  $J$  = 2.8, 1.7 Hz, 1H).  $^{13}\text{C}$  NMR (101 MHz,  $\text{CDCl}_3$ )  $\delta$  = 139.10, 133.63, 132.16, 129.05, 127.69, 127.37 (F couplings), 126.85, 125.86, 125.70, 125.66, 125.63, 125.59 ( $\text{CF}_3$  group, F couplings), 125.29, 125.05 (F couplings), 123.98, 123.16, 116.37, 103.96.  $^{19}\text{F}$  NMR (377 MHz,  $\text{CD}_2\text{Cl}_2$ )  $\delta$  -62.48. HRMS (ESI):  $m/z$  Calcd for  $\text{C}_{17}\text{H}_{12}\text{F}_3\text{N}$  [ $\text{M}+\text{NH}_4$ ] $^+$ : 305.1266; Found: 305.1258.

### 2-phenyl-4-(thiophen-3-yl)-1H-pyrrole (3p)

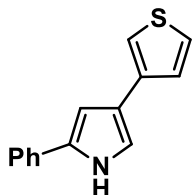

Viscous brown liquid. Yield: 69%.  $^1\text{H}$  NMR (400 MHz,  $\text{CDCl}_3$ )  $\delta$  = 8.40 (s, 1H), 7.54 – 7.47 (m, 2H), 7.39 (dd,  $J$  = 8.5, 7.1 Hz, 2H), 7.33 (dd,  $J$  = 5.0, 2.9 Hz, 1H), 7.28 (dd,  $J$  = 5.0, 1.4 Hz, 1H), 7.26 (d,  $J$  = 2.4 Hz, 1H), 7.25 – 7.20 (m, 1H), 7.06 (dd,  $J$  = 2.8, 1.6 Hz, 1H), 6.74 (dd,  $J$  = 2.8, 1.7 Hz, 1H).  $^{13}\text{C}$  NMR (101 MHz,  $\text{CDCl}_3$ )  $\delta$  = 136.78, 132.86, 132.45, 128.97, 126.53, 126.08, 125.59, 123.89, 122.15, 117.13, 115.58, 104.39. HRMS (ESI):  $m/z$  Calcd for  $\text{C}_{14}\text{H}_{11}\text{NS}$  [ $\text{M}+\text{H}$ ] $^+$ : 226.0690; Found: 226.0685. FTIR: N-H (3337.84  $\text{cm}^{-1}$ ), C-H stretching (2950.0  $\text{cm}^{-1}$ ), C=C (1687.19  $\text{cm}^{-1}$ ), C-N (1022.16  $\text{cm}^{-1}$ ), C-H bending (764.98  $\text{cm}^{-1}$ , 692.15  $\text{cm}^{-1}$ ).

### 2,5-diphenylpyrazine (4a)

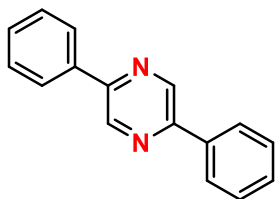

White solid. Yield: 80%.  $^1\text{H}$  NMR (400 MHz,  $\text{CDCl}_3$ )  $\delta$  = 8.98 (s, 2H), 8.20 – 8.13 (m, 4H), 7.57 – 7.54 (m, 2H), 7.54 – 7.47 (m, 4H).  $^{13}\text{C}$  NMR (101 MHz,  $\text{CDCl}_3$ )  $\delta$  = 151.61, 139.92, 136.54, 129.93, 129.02, 127.05. HRMS (ESI):  $m/z$  Calcd for  $\text{C}_{16}\text{H}_{13}\text{N}_2$   $[\text{M}+\text{H}]^+$ : 233.1079; Found: 233.1072. Ref: M. Nitta and T. Kobayashi, *Chem. Lett.*, 1983, **12**, 1715–1718.

### 2,5-di-*p*-tolylpyrazine (4b)

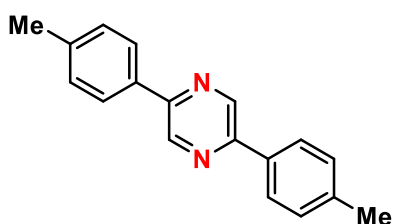

Yellow solid. Yield: 72%.  $^1\text{H}$  NMR (400 MHz,  $\text{CDCl}_3$ -*d*)  $\delta$  = 8.91 (s, 2H), 8.09 – 8.02 (m, 4H), 7.37 – 7.29 (m, 4H), 2.44 (s, 6H).  $^{13}\text{C}$  NMR (101 MHz,  $\text{CDCl}_3$ )  $\delta$  = 151.52, 140.03, 139.34, 133.85, 129.72, 126.91, 21.40. HRMS (ESI):  $m/z$  Calcd for  $\text{C}_{18}\text{H}_{17}\text{N}_2$   $[\text{M}+\text{H}]^+$ : 261.1393; Found: 261.1386. Ref: P. Vitale, L. Cicco, F. Messa, F. M. Perna, A. Salomone and V. Capriati, *Eur. J. Org. Chem.*, 2019, **2019**, 5557–5562.

### 2,5-bis(3,5-dimethylphenyl)pyrazine (4c)

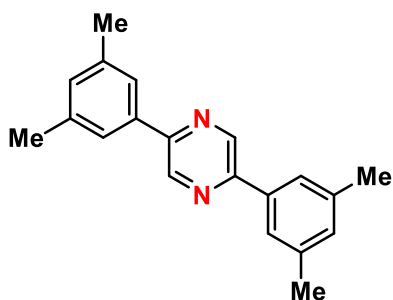



Yellowish-brown solid. Yield: 72%.  $^1\text{H}$  NMR (400 MHz,  $\text{CDCl}_3$ )  $\delta$  = 8.55 (s, 2H), 7.33 (d,  $J$  = 7.5 Hz, 2H), 7.07 (s, 3H), 7.05 (s, 2H), 2.37 (s, 6H), 2.31 (s, 6H).  $^{13}\text{C}$  NMR (101 MHz,  $\text{CDCl}_3$ )  $\delta$  = 154.35, 142.22, 139.02, 136.25, 134.21, 131.86, 130.04, 126.87, 21.20, 20.57 HRMS (ESI):  $m/z$  Calcd for  $\text{C}_{20}\text{H}_{21}\text{N}_2$   $[\text{M}+\text{H}]^+$ : 289.1705; Found: 289.1698.

#### 2,5-bis(4-(tert-butyl)phenyl)pyrazine (4d)

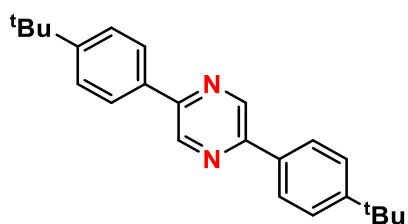

Yellow solid. Yield: 67%.  $^1\text{H}$  NMR (400 MHz,  $\text{CDCl}_3$ )  $\delta$  = 8.92 (s, 2H), 8.13 – 8.04 (m, 4H), 7.60 – 7.52 (m, 4H), 1.39 (s, 18H).  $^{13}\text{C}$  NMR (101 MHz,  $\text{CDCl}_3$ )  $\delta$  = 153.18, 151.57, 139.45, 133.87, 126.78, 125.97, 34.83, 31.28. HRMS (ESI):  $m/z$  Calcd for  $\text{C}_{24}\text{H}_{29}\text{N}_2$   $[\text{M}+\text{H}]^+$ : 345.2325; Found: 345.2337. Ref: Z. Chen, D. Ye, G. Xu, M. Ye and L. Liu, *Org. Biomol. Chem.*, 2013, **11**, 6699–6702.

#### 2,5-bis(4-fluorophenyl)pyrazine (4e)

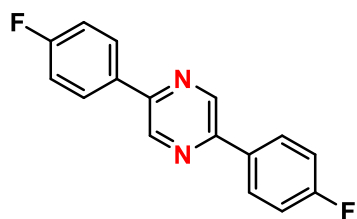

Yellow solid. Yield: 70%.  $^1\text{H}$  NMR (400 MHz,  $\text{CDCl}_3$ )  $\delta$  = 8.93 (s, 2H), 8.14 (dd,  $J$  = 8.9, 5.3 Hz, 4H), 7.26 - 7.21 (m, 4H).  $^{13}\text{C}$  NMR (101 MHz,  $\text{CDCl}_3$ )  $\delta$  = 165.43, 162.94, 150.86, 138.99, 132.43 (F-coupling), 129.03 - 128.95 (F-coupling), 116.26 - 116.05 (F-coupling),  $^{19}\text{F}$  NMR (377 MHz,  $\text{CDCl}_3$ )  $\delta$  -110.64. HRMS (ESI):  $m/z$  Calcd for  $\text{C}_{16}\text{H}_{11}\text{N}_2\text{F}_2$   $[\text{M}+\text{H}]^+$ : 269.0890; Found: 269.0893. FTIR: N-H (3337.84  $\text{cm}^{-1}$ ), C-H stretching (2923.72.0  $\text{cm}^{-1}$ ), C=C (1602.21  $\text{cm}^{-1}$ , 1511.47  $\text{cm}^{-1}$ ), C-N (1228.33  $\text{cm}^{-1}$ , 1436.53  $\text{cm}^{-1}$ ), C-H bending (1157.84  $\text{cm}^{-1}$ , 827.66

cm<sup>-1</sup>). Ref: P. Vitale, L. Cicco, F. Messa, F. M. Perna, A. Salomone and V. Capriati, *European J. Org. Chem.*, 2019, **2019**, 5557–5562).

#### 2,5-bis(4-chlorophenyl)pyrazine (4f)

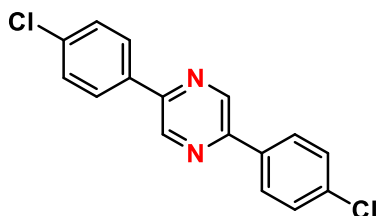

Yellow solid. Yield: 60%. <sup>1</sup>H NMR (400 MHz, CDCl<sub>3</sub>) δ = 9.04 (s, 2H), 8.05 – 7.98 (m, 4H), 7.54 – 7.47 (m, 4H). <sup>13</sup>C NMR (101 MHz, CDCl<sub>3</sub>) δ = 149.78, 141.00, 136.20, 134.57, 129.37, 128.04. HRMS (ESI): m/z Calcd for C<sub>16</sub>H<sub>11</sub>N<sub>2</sub>Cl<sub>2</sub> [M+H]<sup>+</sup>: 301.0299; Found: 301.0304. Ref: P. Vitale, L. Cicco, F. Messa, F. M. Perna, A. Salomone and V. Capriati, *Euro. J. Org. Chem.*, 2019, **2019**, 5557–5562.

#### 2,5-bis(4-bromophenyl)pyrazine (4g)

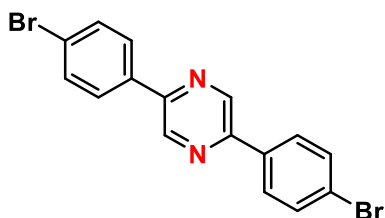

White solid. Yield: 60%. <sup>1</sup>H NMR (400 MHz, CDCl<sub>3</sub>) δ = 8.96 (s, 2H), 8.06 – 7.97 (m, 4H), 7.68 (dd, J = 6.3, 4.3 Hz, 4H). <sup>13</sup>C NMR (101 MHz, CDCl<sub>3</sub>) δ = 150.62, 139.92, 135.18, 132.28, 128.54, 124.74. HRMS (ESI): m/z Calcd for C<sub>16</sub>H<sub>11</sub>N<sub>2</sub>Br<sub>2</sub> [M+H]<sup>+</sup>: 388.9289; Found: 388.9301.

#### 2,3,5,6-tetraphenylpyrazine (4h)

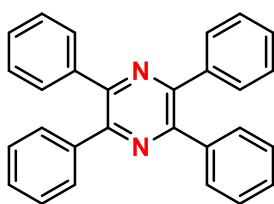

Yellow solid. Yield: 63%.  $^1\text{H}$  NMR (400 MHz,  $\text{CDCl}_3$ )  $\delta$  7.57 (m, 8H), 7.25 (m, 12H).  $^{13}\text{C}$  NMR (101 MHz,  $\text{CDCl}_3$ )  $\delta$  = 148.46, 138.50, 129.92, 128.64, 128.27. HRMS (ESI):  $m/z$  Calcd for  $\text{C}_{28}\text{H}_{21}\text{N}_2$   $[\text{M}+\text{H}]^+$ : 385.1705; Found: 385.1703. Ref: L. O. Khafizova, M. G. Shaibakova and U. M. Dzhemilev, *ChemistrySelect*, 2018, **3**, 11451–11453.

#### 1,2,3,5,6,7-hexahydrodicyclopenta[b,e]pyrazine (4i)

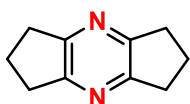

White solid. Yield: 59%.  $^1\text{H}$  NMR (400 MHz,  $\text{CDCl}_3$ )  $\delta$  3.00 (t,  $J$  = 7.6 Hz, 4H), 2.20 (t,  $J$  = 7.7 Hz, 2H).  $^{13}\text{C}$  NMR (101 MHz,  $\text{CDCl}_3$ )  $\delta$  156.09, 31.60, 21.40. HRMS (ESI):  $m/z$  Calcd for  $\text{C}_{10}\text{H}_{13}\text{N}_2$   $[\text{M}+\text{H}]^+$ : 161.1079; Found: 161.1074.

#### 1,2,3,4,6,7,8,9-octahydrophenazine (4j)

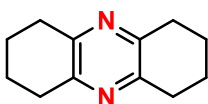

White solid. Yield: 65%.  $^1\text{H}$  NMR (400 MHz,  $\text{CDCl}_3$ )  $\delta$  = 2.92 – 2.84 (m, 4H), 1.90 (td,  $J$  = 4.1, 2.2 Hz, 4H).  $^{13}\text{C}$  NMR (101 MHz,  $\text{CDCl}_3$ )  $\delta$  = 149.35, 31.64, 22.82. HRMS (ESI):  $m/z$  Calcd for  $\text{C}_{12}\text{H}_{17}\text{N}_2$   $[\text{M}+\text{H}]^+$ : 189.1386; Found: 189.1377

#### 1,2,3,4,5,6,8,9,10,11,12,13-dodecahydrocycloocta[b,e]pyrazine (4k)

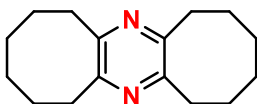

White solid. Yield: 61%.  $^1\text{H}$  NMR (400 MHz, Chloroform-*d*)  $\delta$  2.96 – 2.82 (m, 8H), 1.73 (dt,  $J$  = 3.7, 1.6 Hz, 8H), 1.40 – 1.27 (m, 8H). HRMS (ESI):  $m/z$  Calcd for  $\text{C}_{14}\text{H}_{26}\text{N}_2\text{Na}$   $[\text{M}+\text{H}]^+$ : 245.1994 ; Found: 245.2005.

## 6. References

1. Perrin, D.D. and Armarego, W.L.F. (1988) Purification of Laboratory Chemicals. 3rd Edition, Pergamon, Oxford.
2. M. Peña-López, P. Piehl, S. Elangovan, H. Neumann and M. Beller, *Angew. Chem. Int. Ed.*, 2016, **55**, 14967–14971.
3. M. Nitta and T. Kobayashi, *Chem. Lett.*, 1983, **12**, 1715–1718.
4. P. Vitale, L. Cicco, F. Messa, F. M. Perna, A. Salomone and V. Capriati, *Euro. J. Org. Chem.*, 2019, **2019**, 5557–5562.
5. L. O. Khafizova, M. G. Shaibakova and U. M. Dzhemilev, *ChemistrySelect*, 2018, **3**, 11451–11453.
6. Z. Chen, D. Ye, G. Xu, M. Ye and L. Liu, *Org. Biomol. Chem.*, 2013, **11**, 6699–6702.
7. G. Sivakumar, M. Subaramanian and E. Balaraman, *ACS Sustain. Chem. Eng.*, 2022, **10**, 7362–7373.

## 7. Copy of Spectra

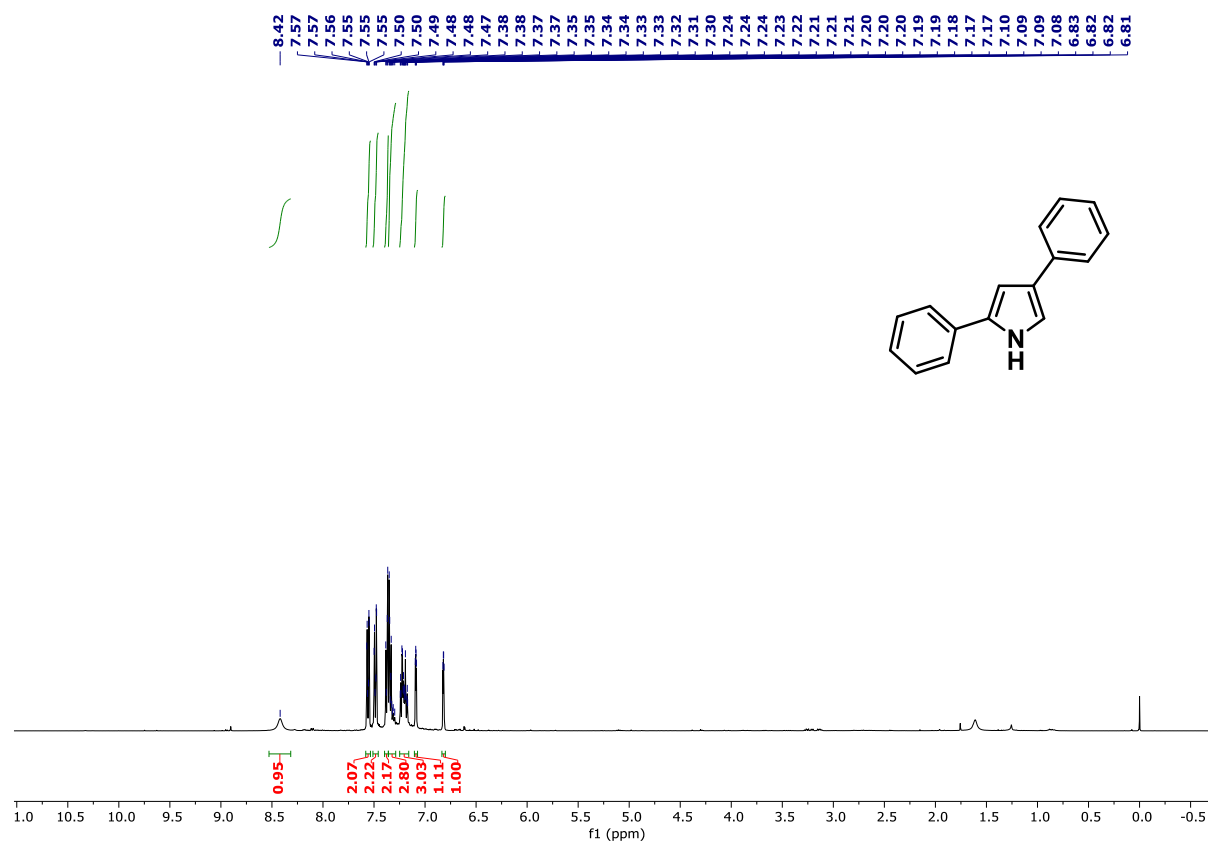

<sup>1</sup>H NMR of 2,4-diphenyl-1H-pyrrole (3a)

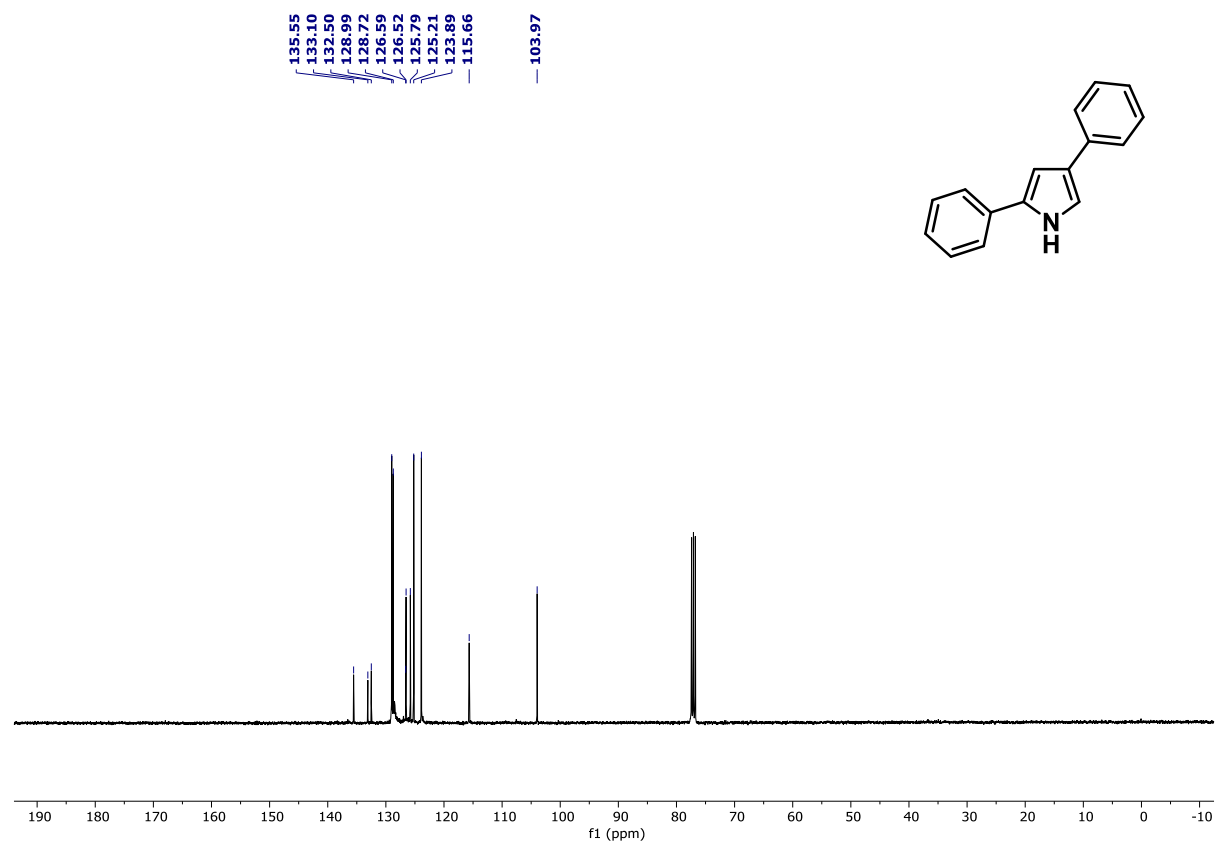

<sup>13</sup>C NMR of 2,4-diphenyl-1H-pyrrole (3a)

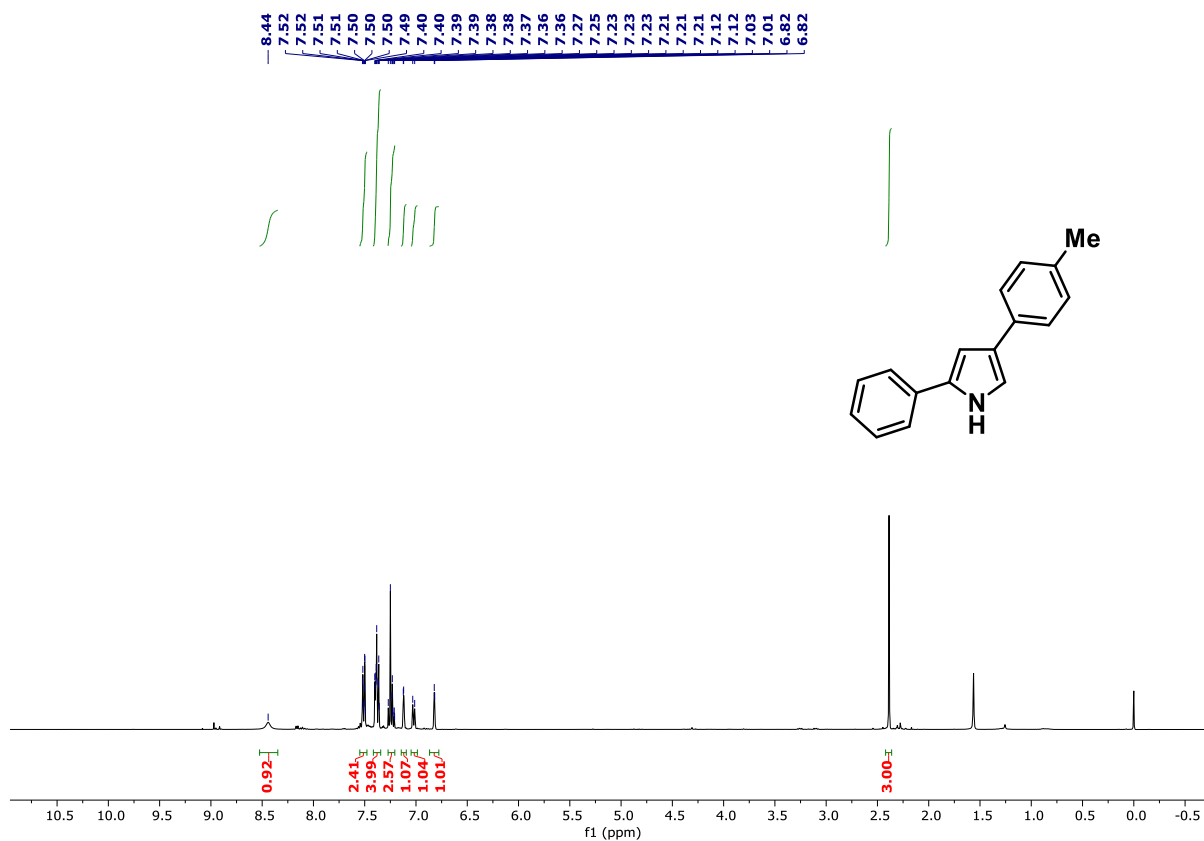

<sup>1</sup>H NMR of 2-phenyl-4-(*p*-tolyl)-1H-pyrrole (3b)

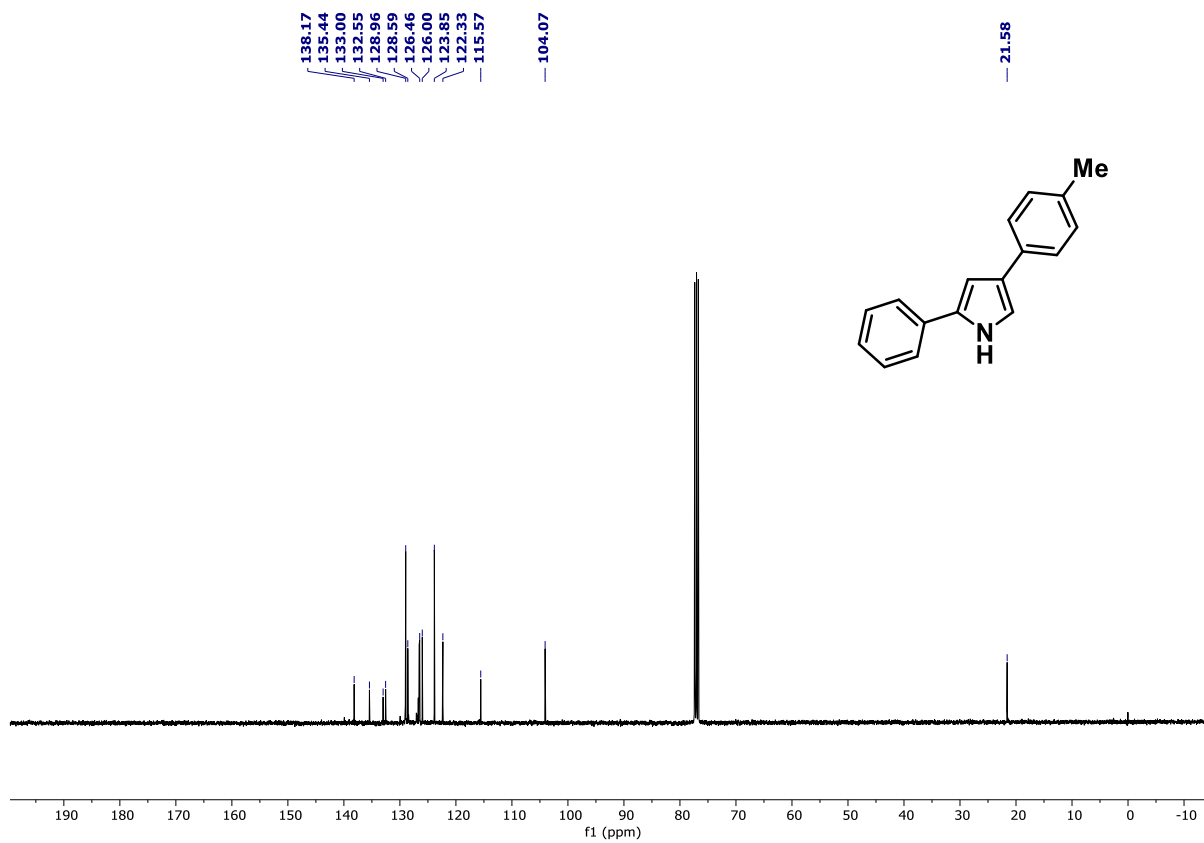

<sup>13</sup>C NMR of 2-phenyl-4-(*p*-tolyl)-1H-pyrrole (3b)

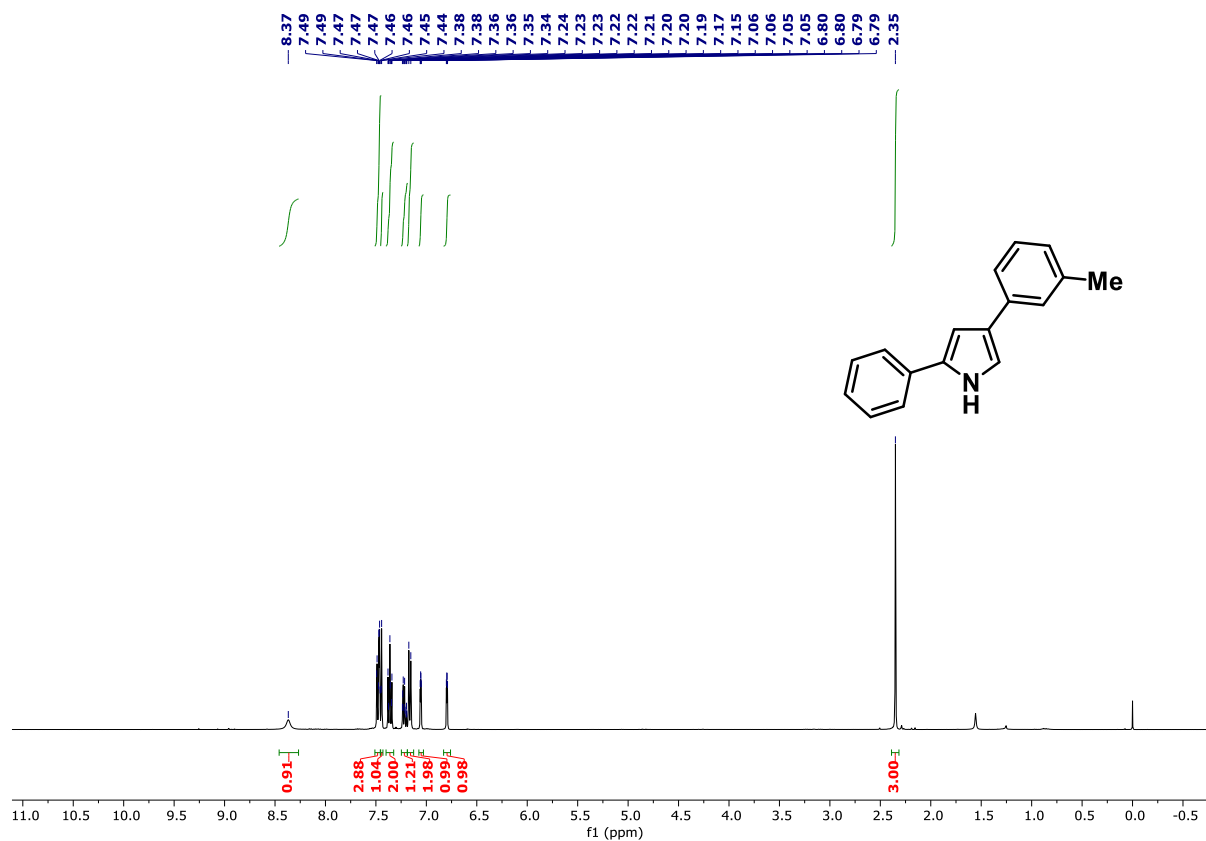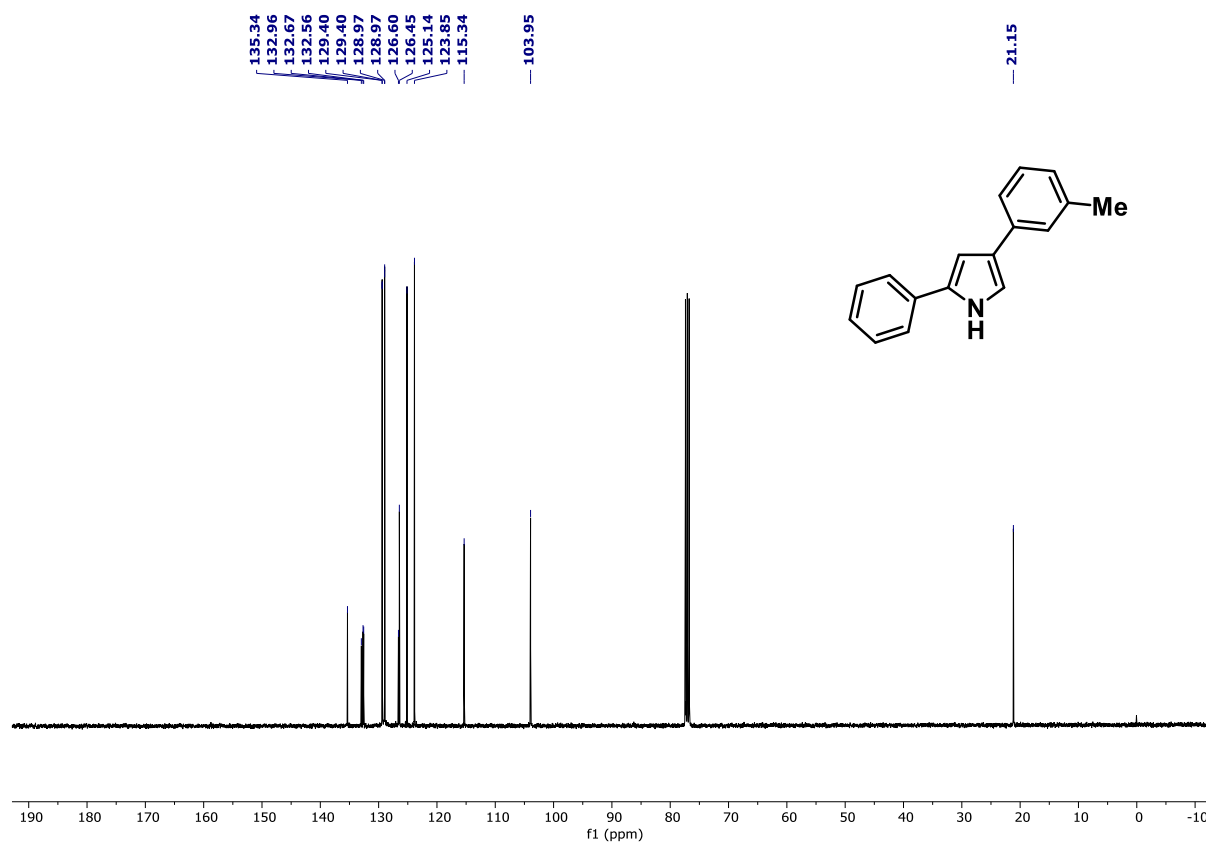

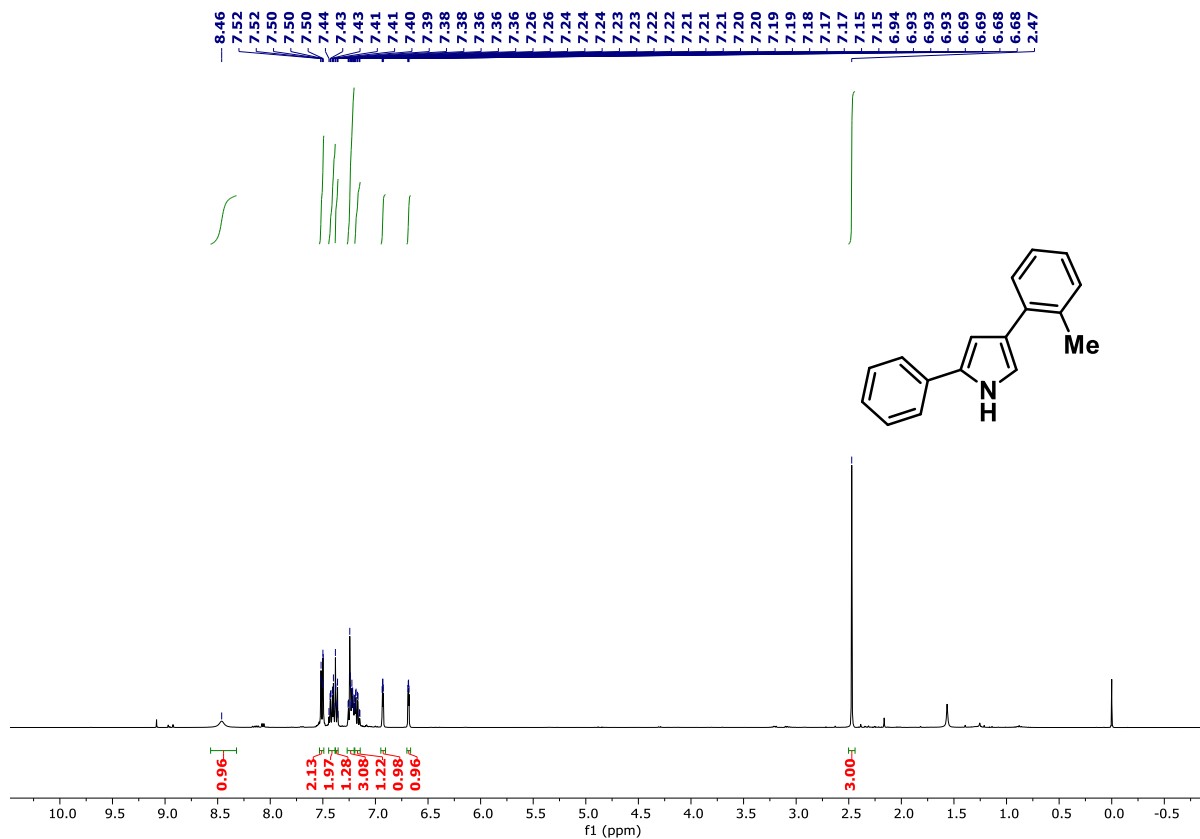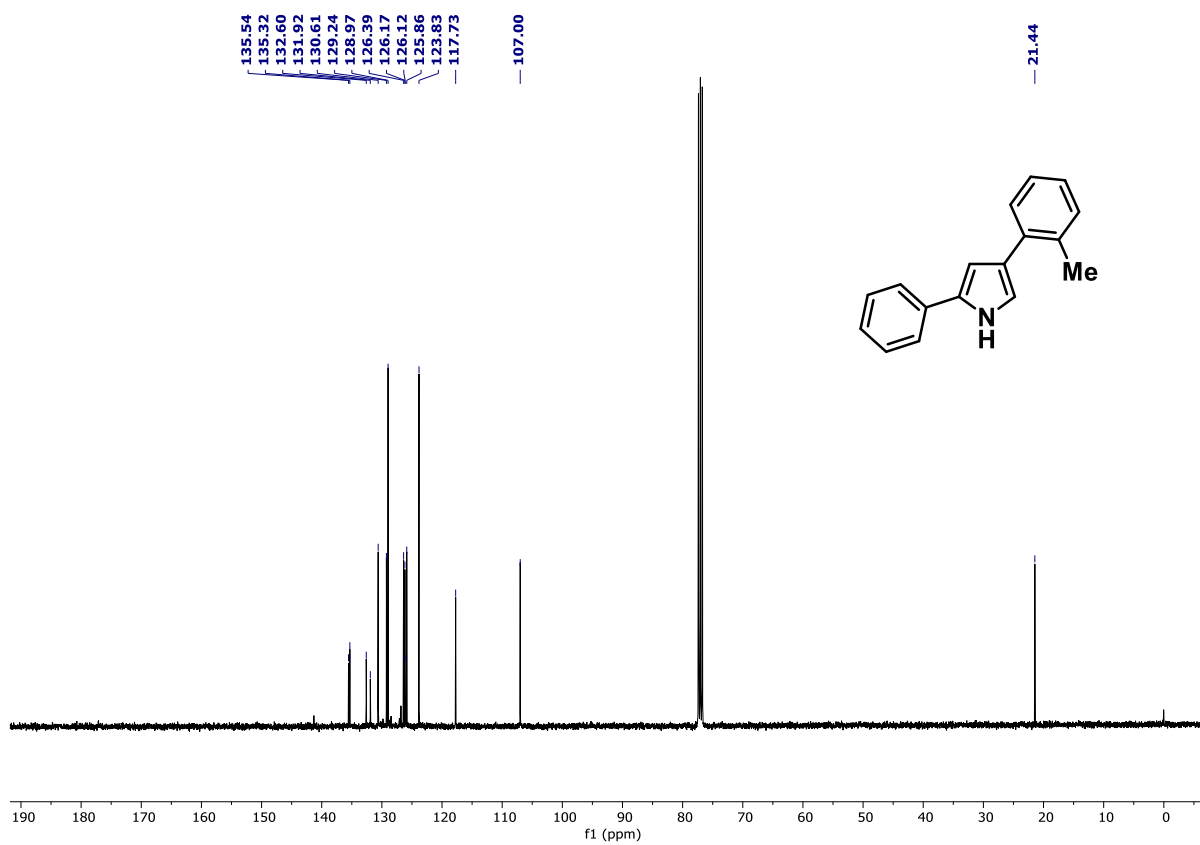



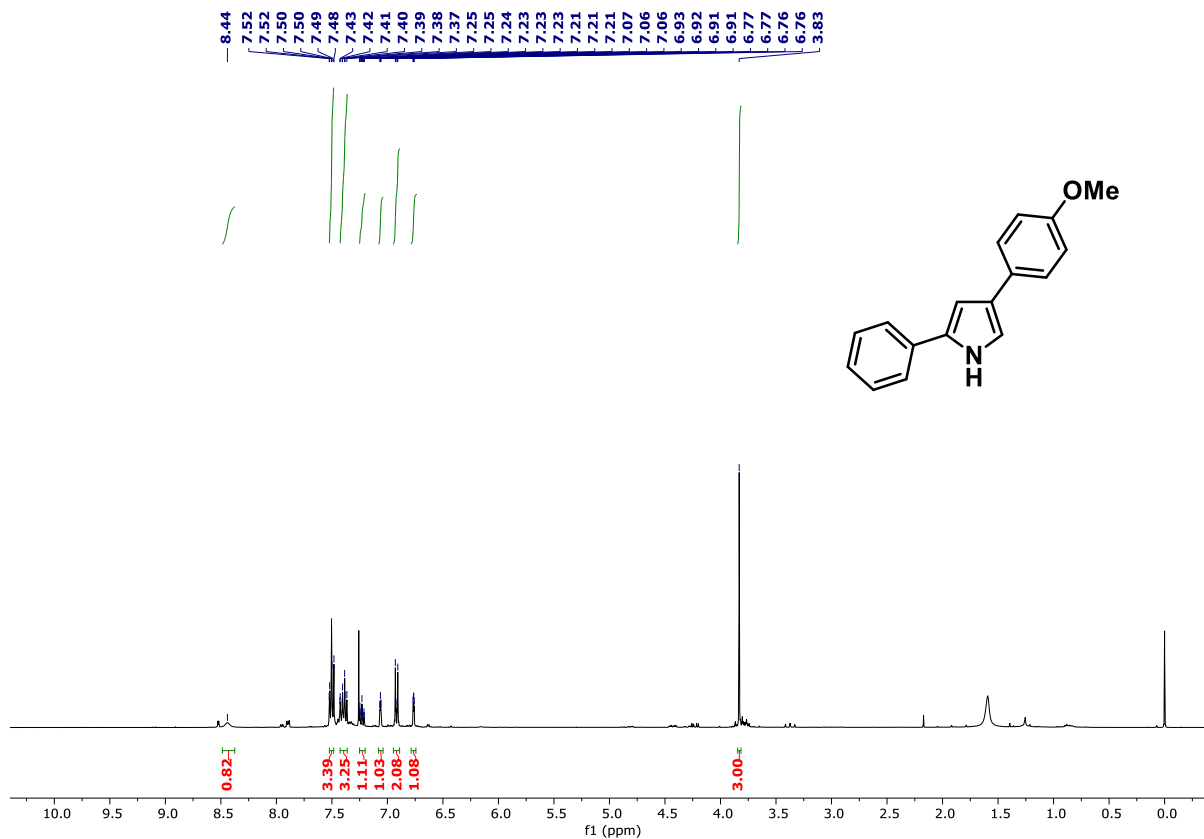

<sup>1</sup>H NMR of 4-(4-methoxyphenyl)-2-phenyl-1H-pyrrole (3e)

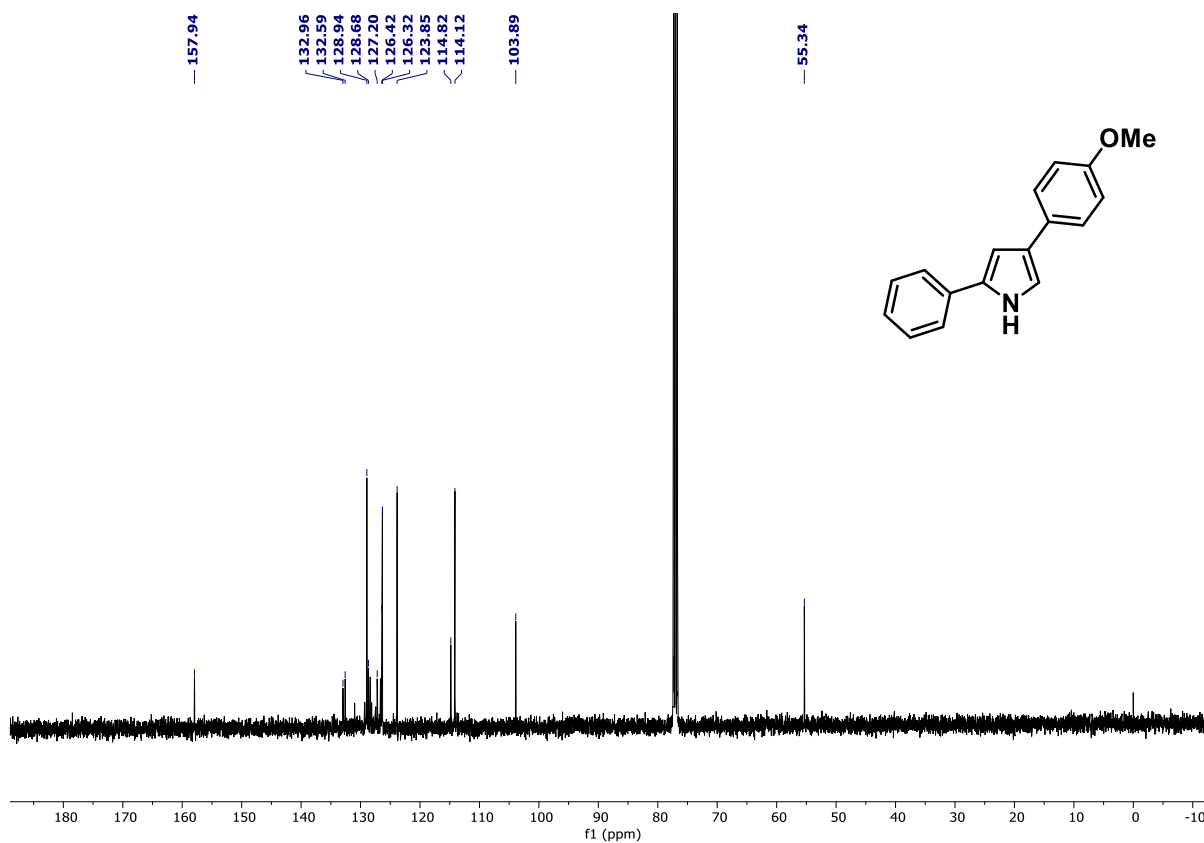

<sup>13</sup>C NMR of 4-(4-methoxyphenyl)-2-phenyl-1H-pyrrole (3e)

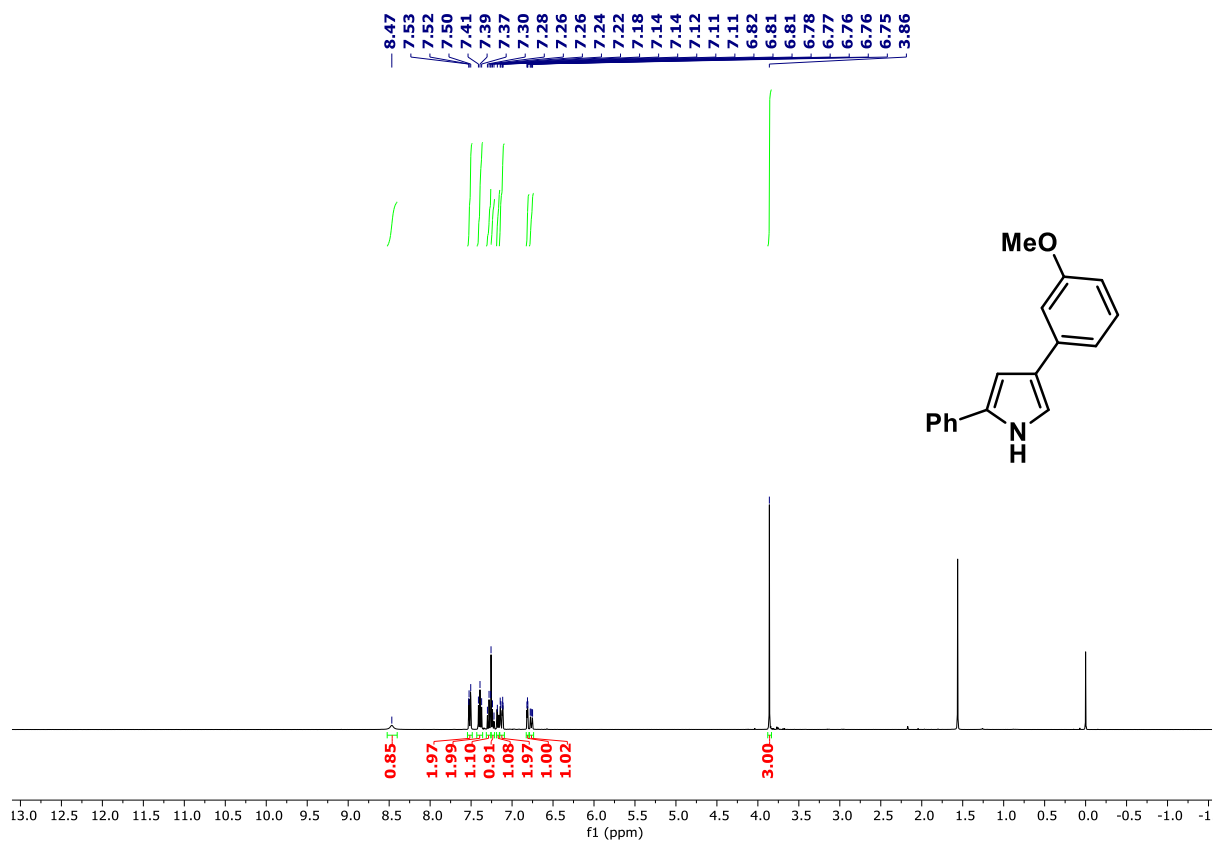

**<sup>1</sup>H NMR of 4-(3-methoxyphenyl)-2-phenyl-1H-pyrrole (3f)**

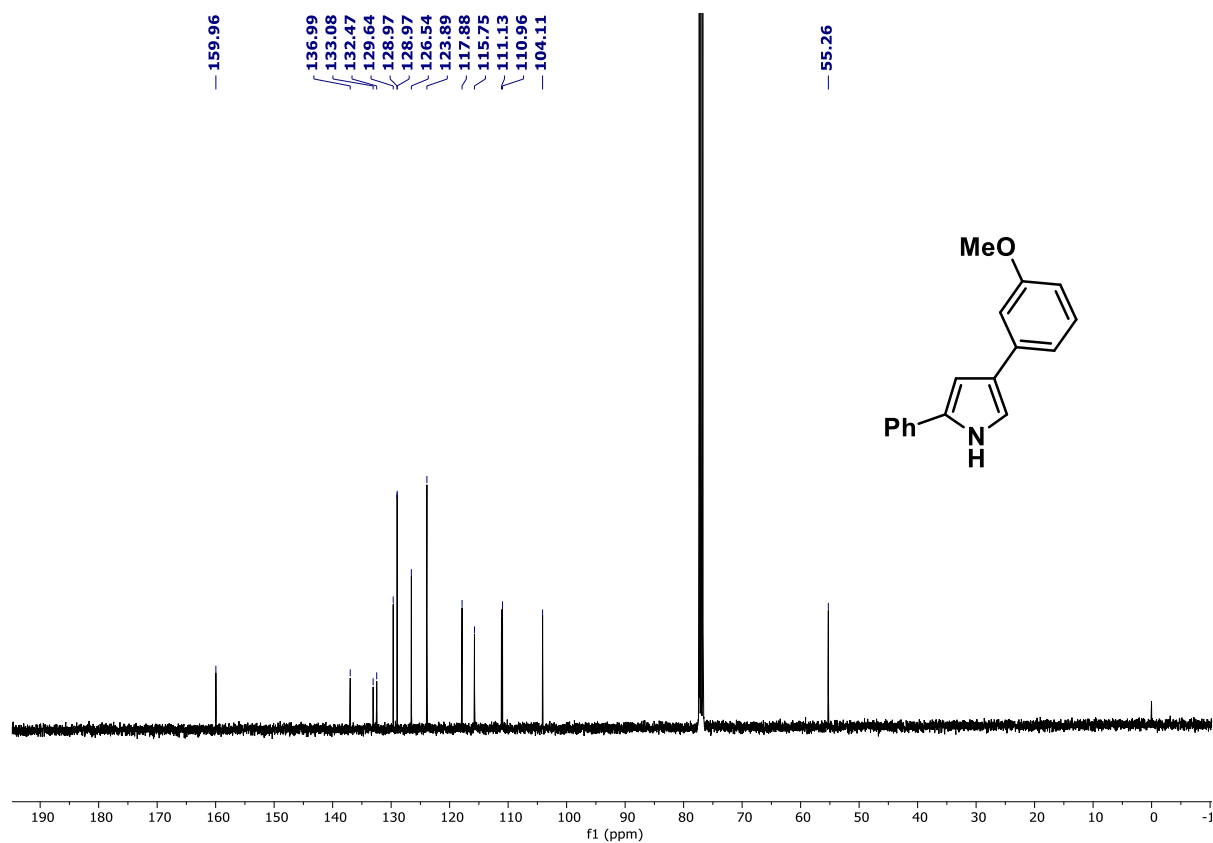

**<sup>13</sup>C NMR of 4-(3-methoxyphenyl)-2-phenyl-1H-pyrrole (3f)**

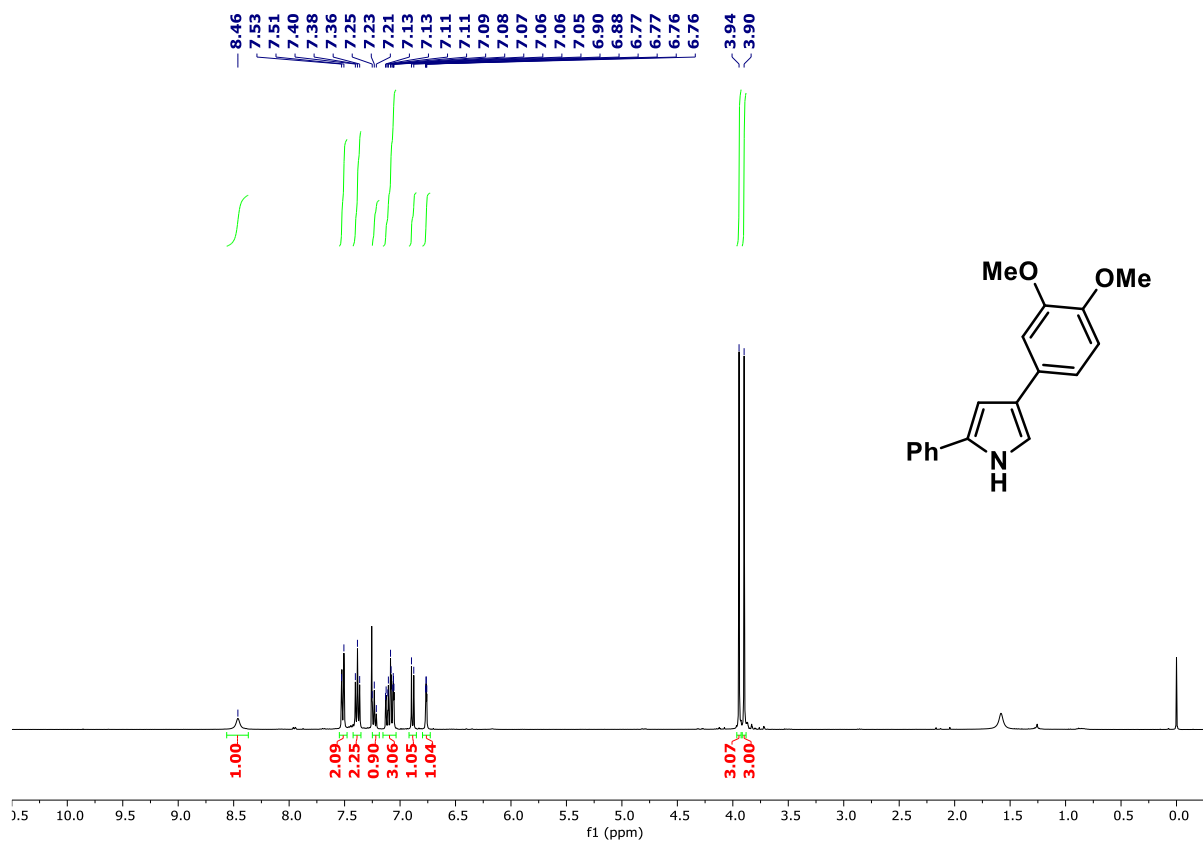

$^1\text{H}$  NMR of 4-(3,4-dimethoxyphenyl)-2-phenyl-1H-pyrrole (**3g**)

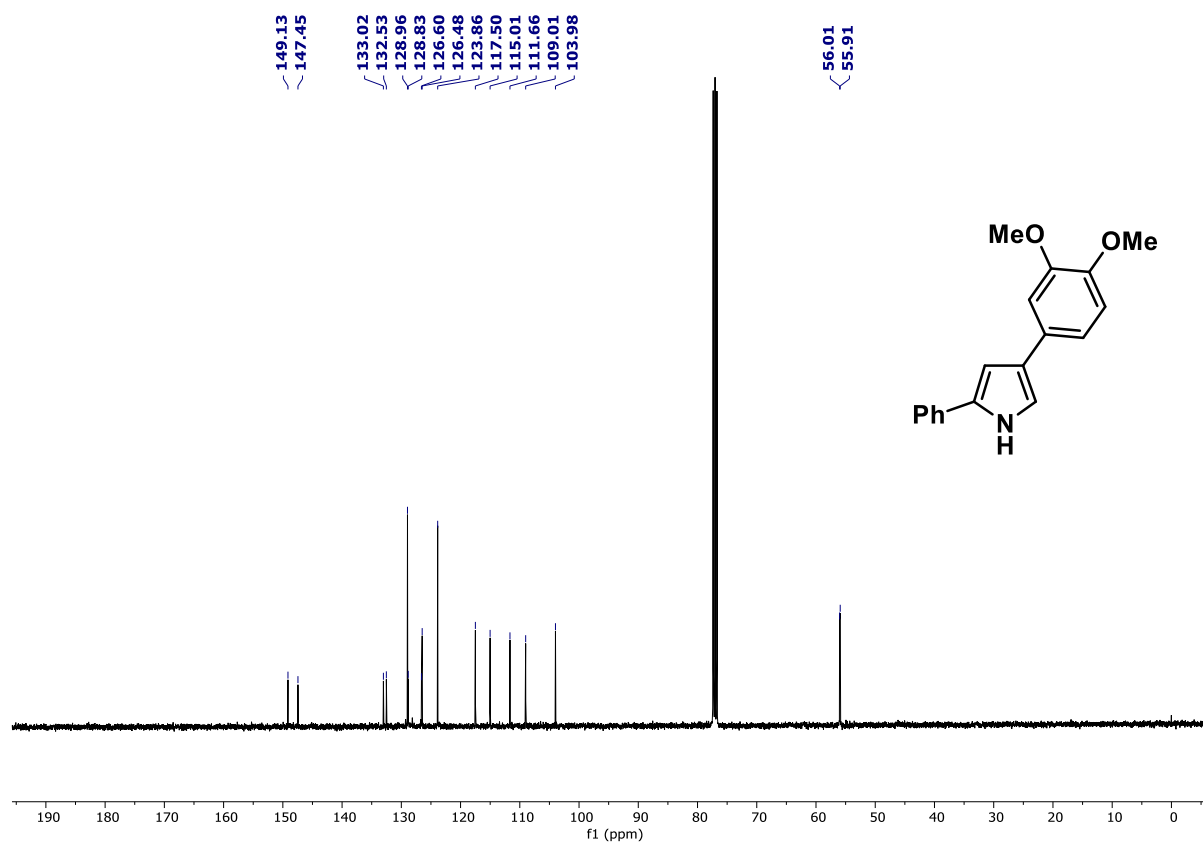

$^{13}\text{C}$  NMR of 4-(3,4-dimethoxyphenyl)-2-phenyl-1H-pyrrole (**3g**)

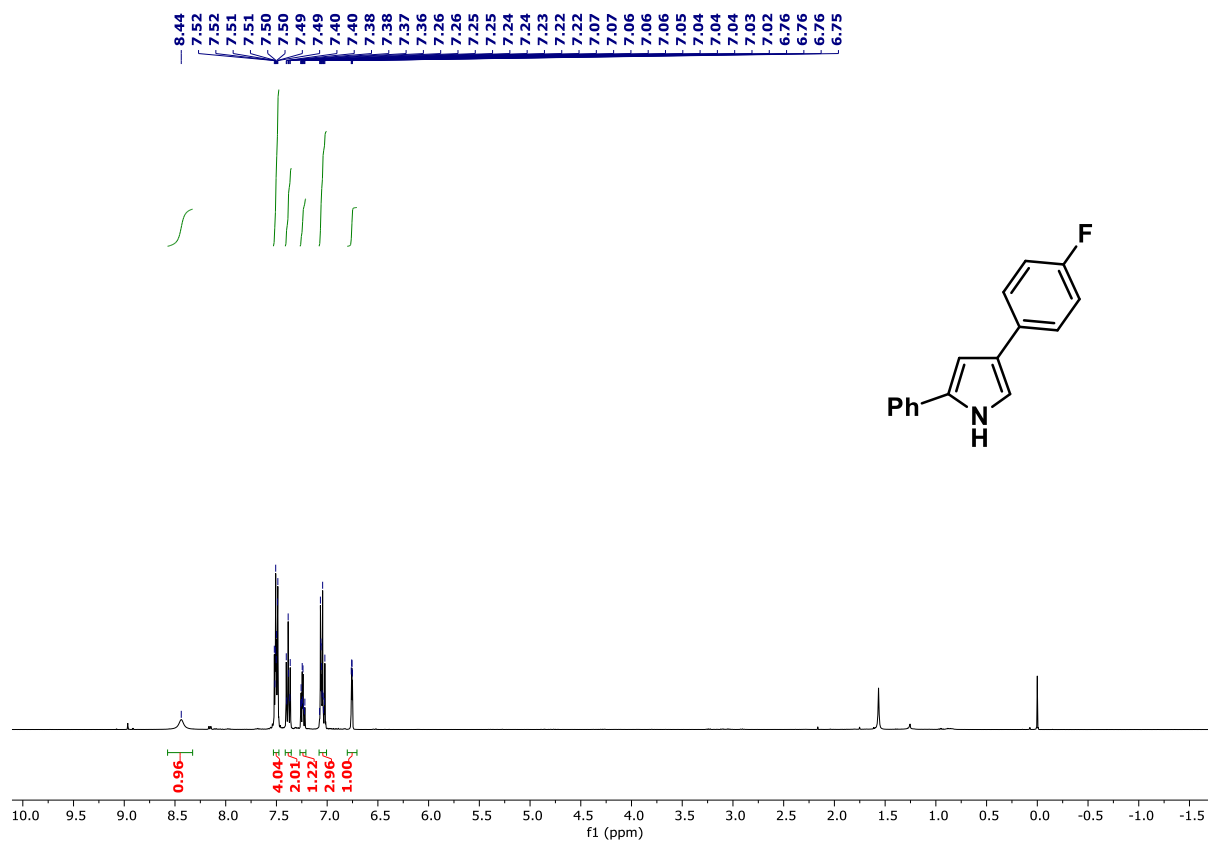

<sup>1</sup>H NMR of 4-(4-fluorophenyl)-2-phenyl-1H-pyrrole (3h)

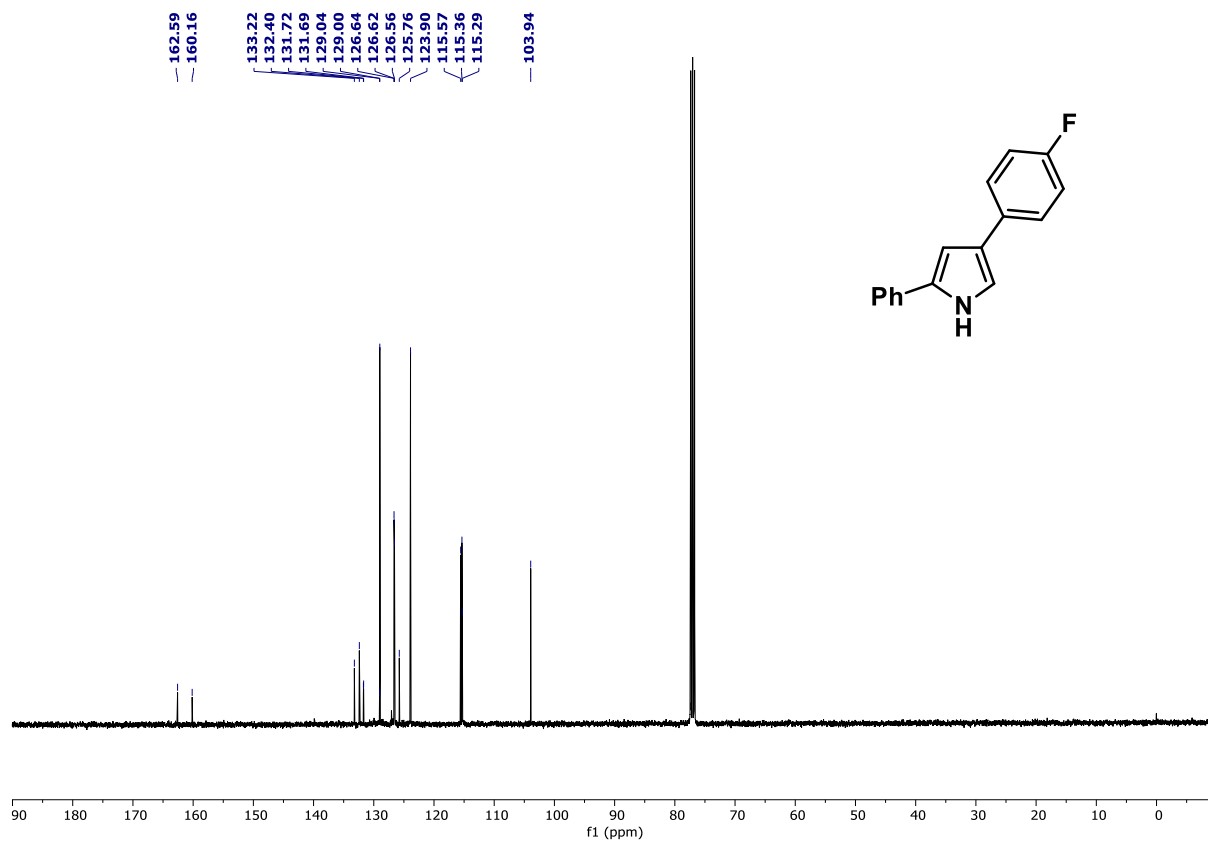

<sup>13</sup>C NMR of 4-(4-fluorophenyl)-2-phenyl-1H-pyrrole (3h)

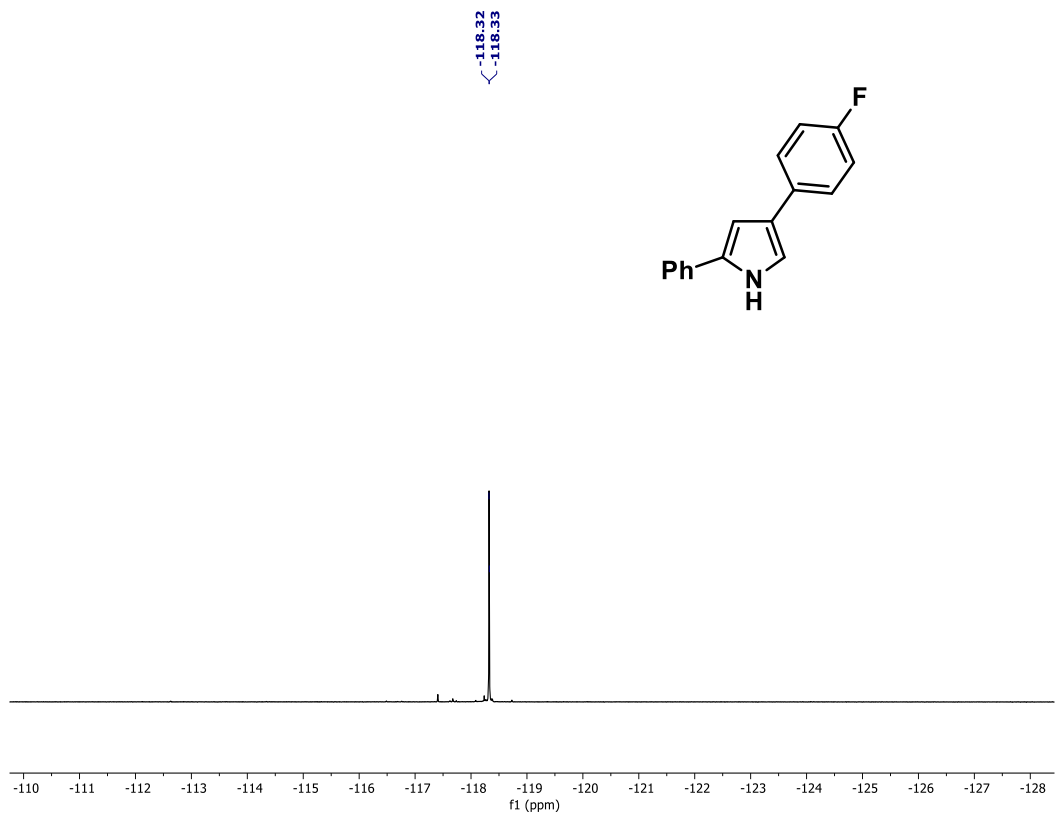

**<sup>19</sup>F NMR of 4-(4-fluorophenyl)-2-phenyl-1H-pyrrole (3h)**

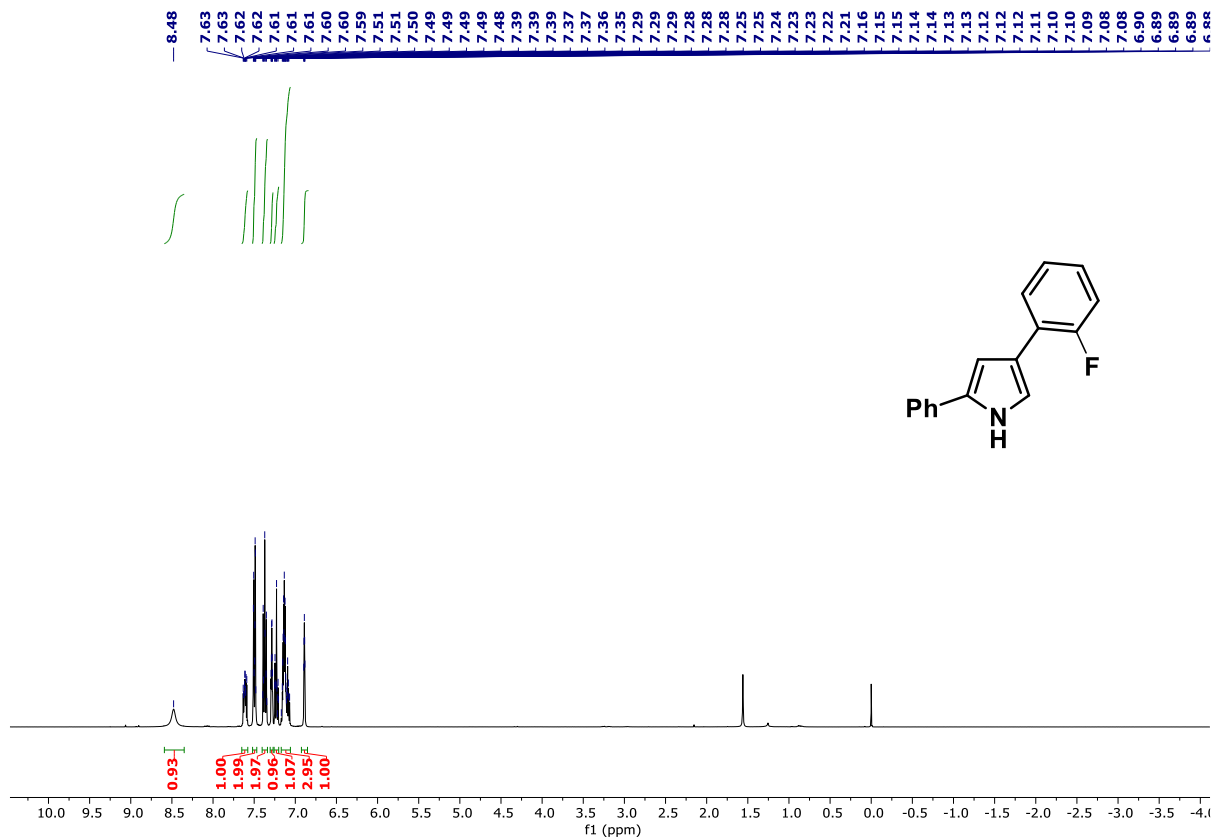

**<sup>1</sup>H NMR of 4-(2-fluorophenyl)-2-phenyl-1H-pyrrole (3i)**

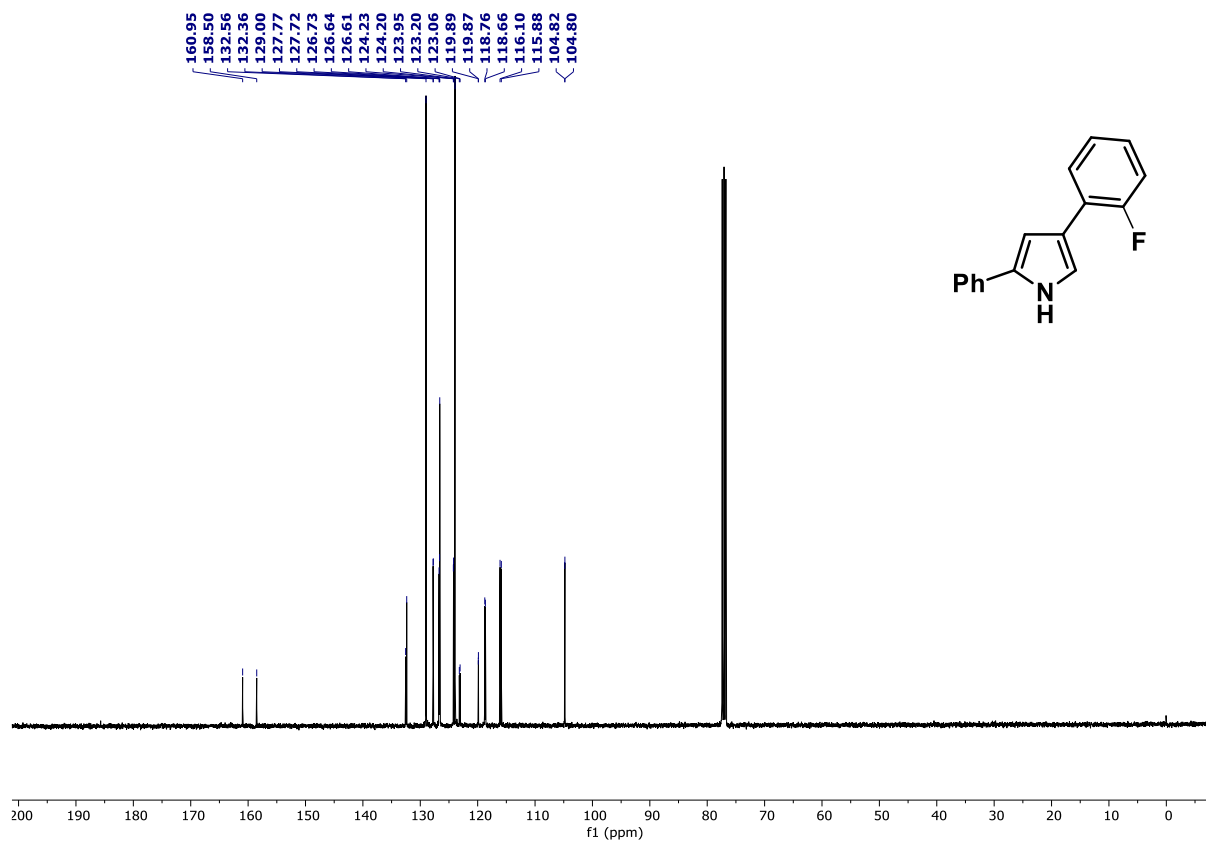

<sup>13</sup>C NMR of 4-(2-fluorophenyl)-2-phenyl-1H-pyrrole (3i)

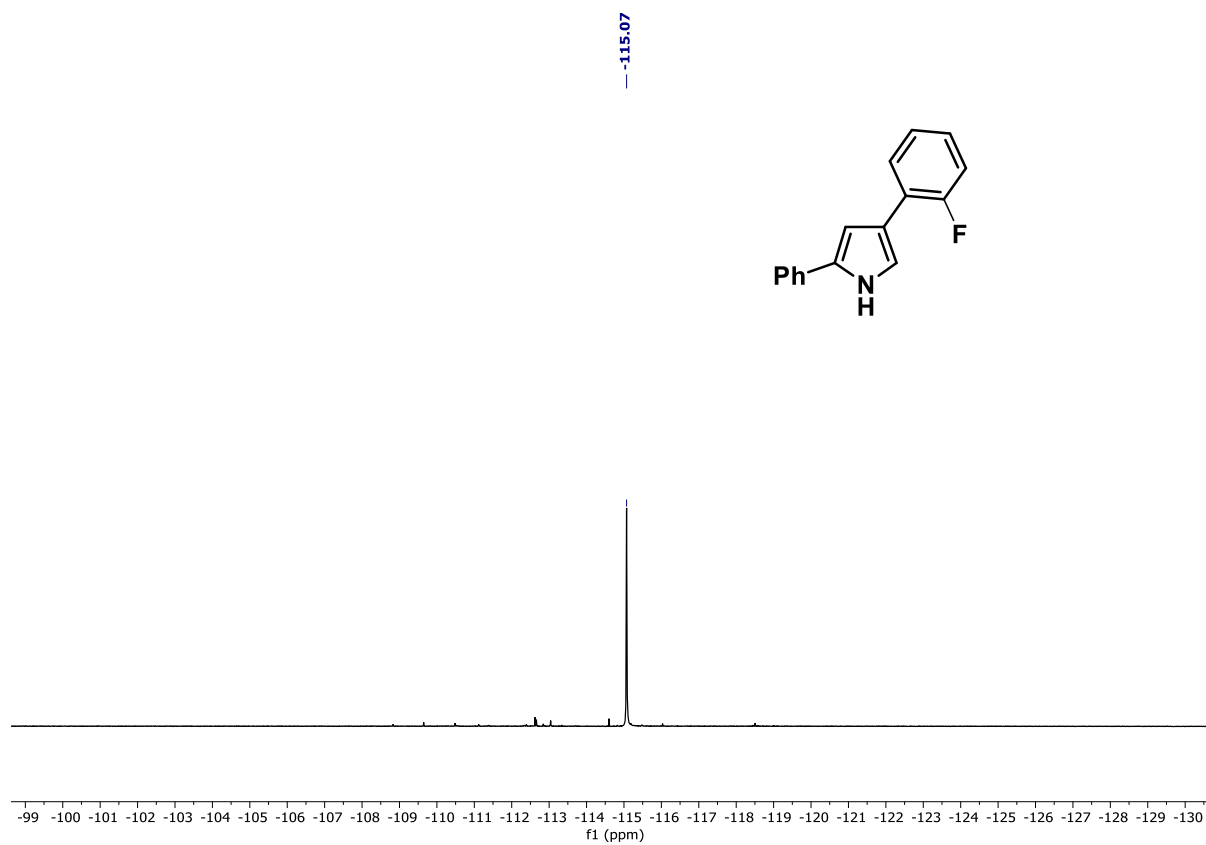

<sup>19</sup>F NMR of 4-(2-fluorophenyl)-2-phenyl-1H-pyrrole (3i)

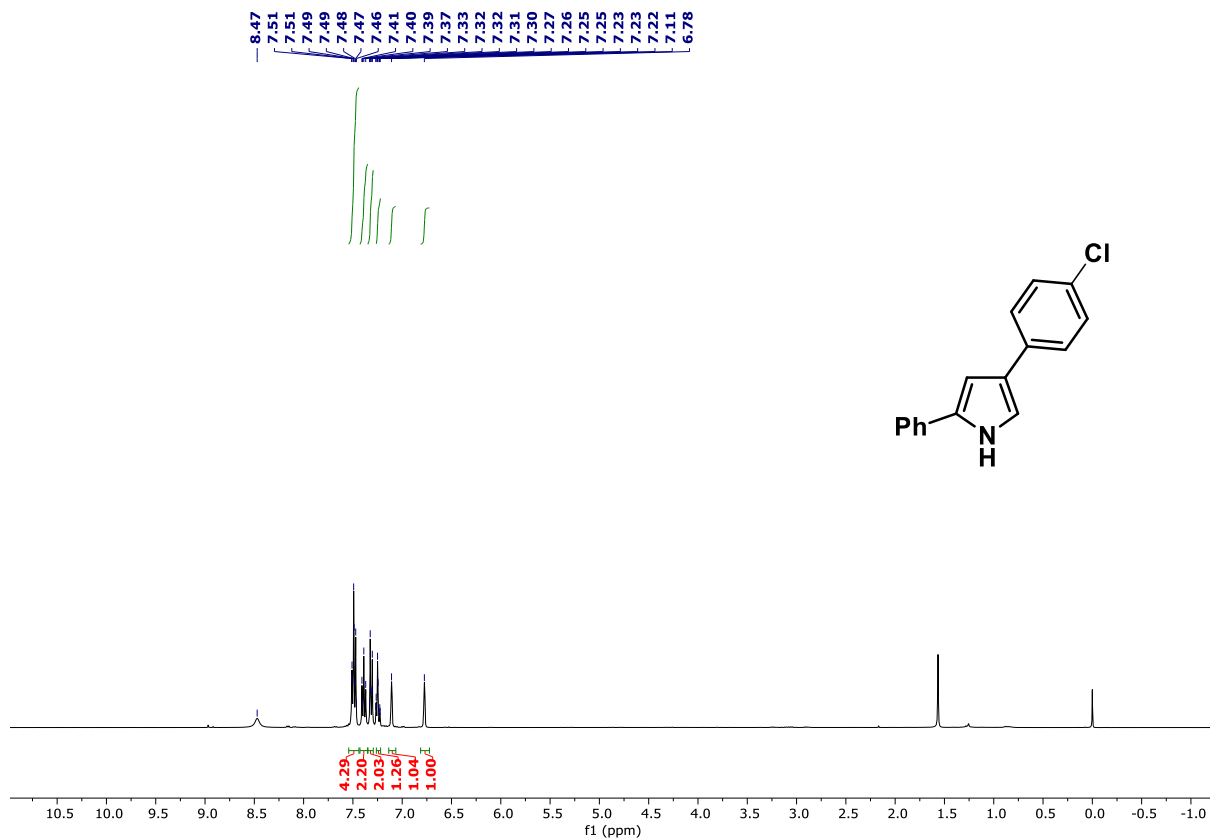

$^1\text{H}$  NMR of 4-(4-chlorophenyl)-2-phenyl-1H-pyrrole (**3j**)

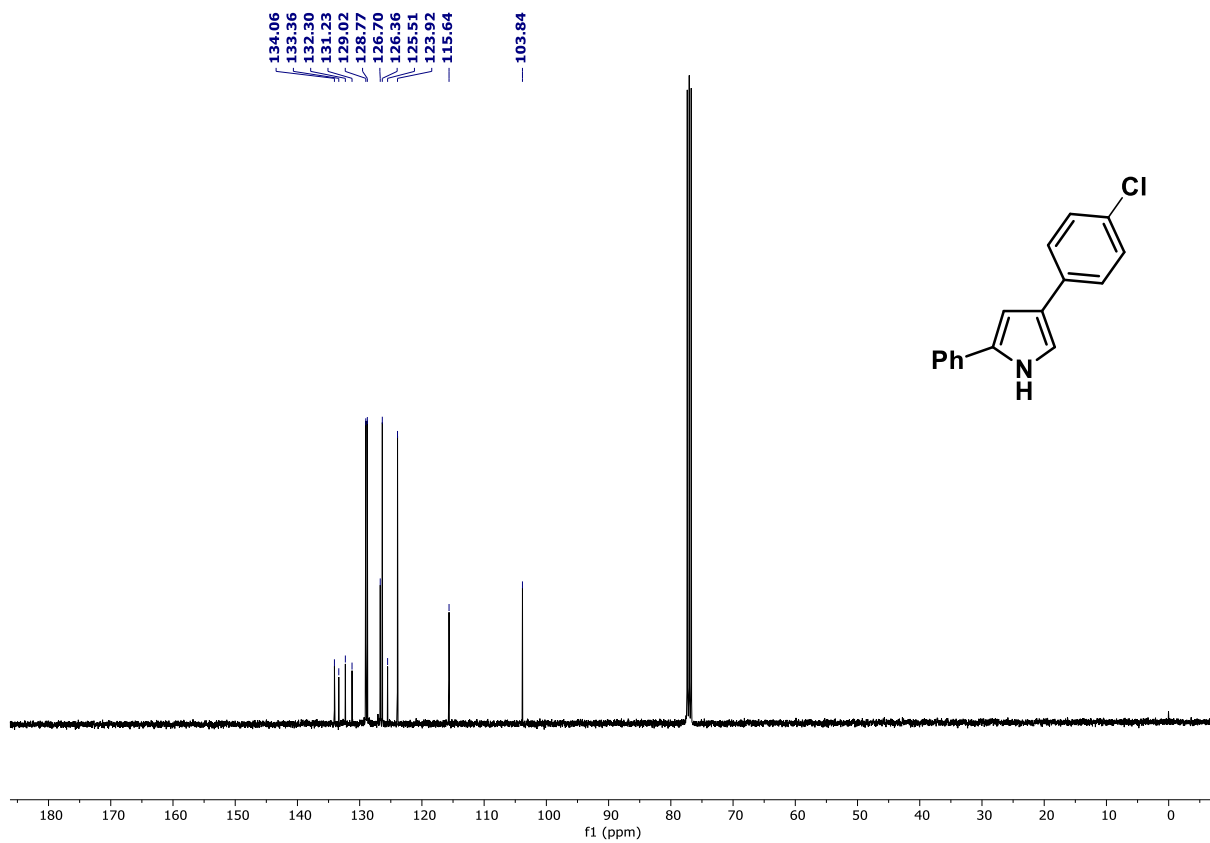

$^{13}\text{C}$  NMR of 4-(4-chlorophenyl)-2-phenyl-1H-pyrrole (**3j**)

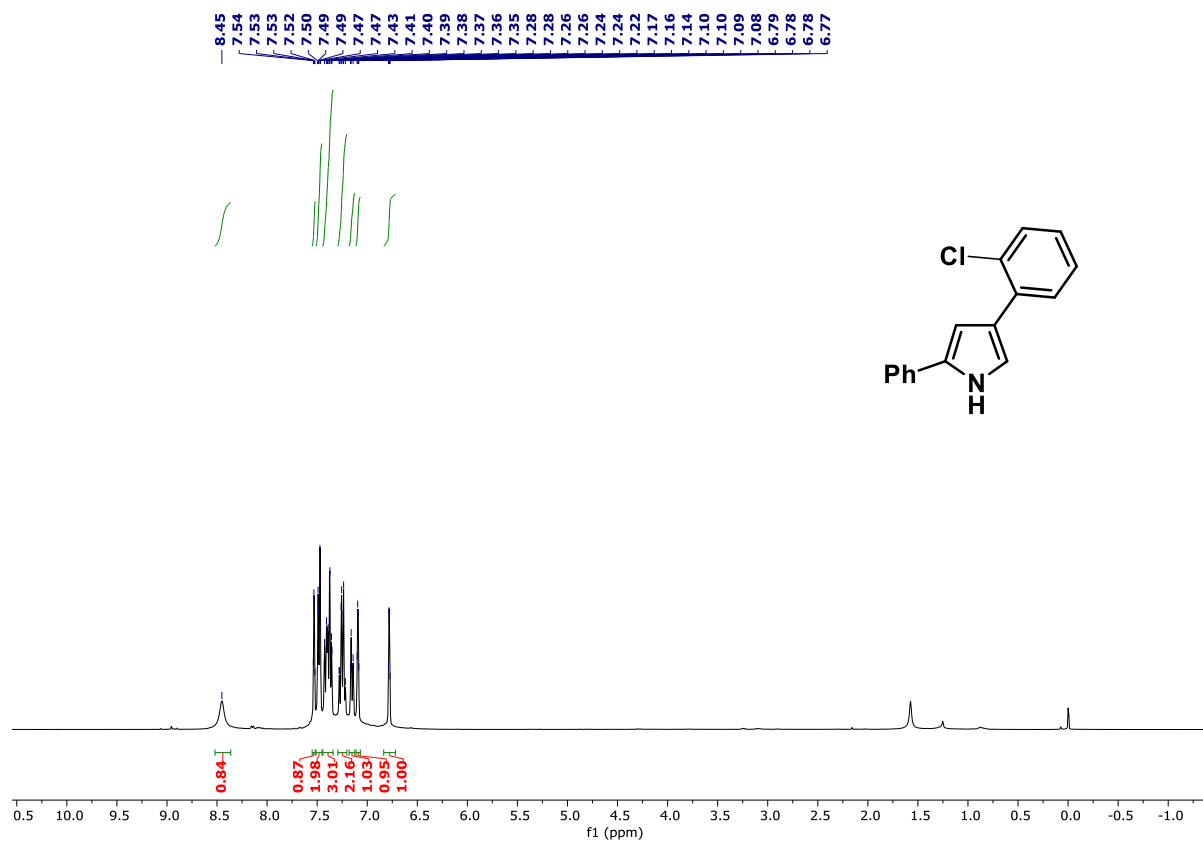

<sup>1</sup>H NMR of 4-(2-chlorophenyl)-2-phenyl-1H-pyrrole (**3k**)

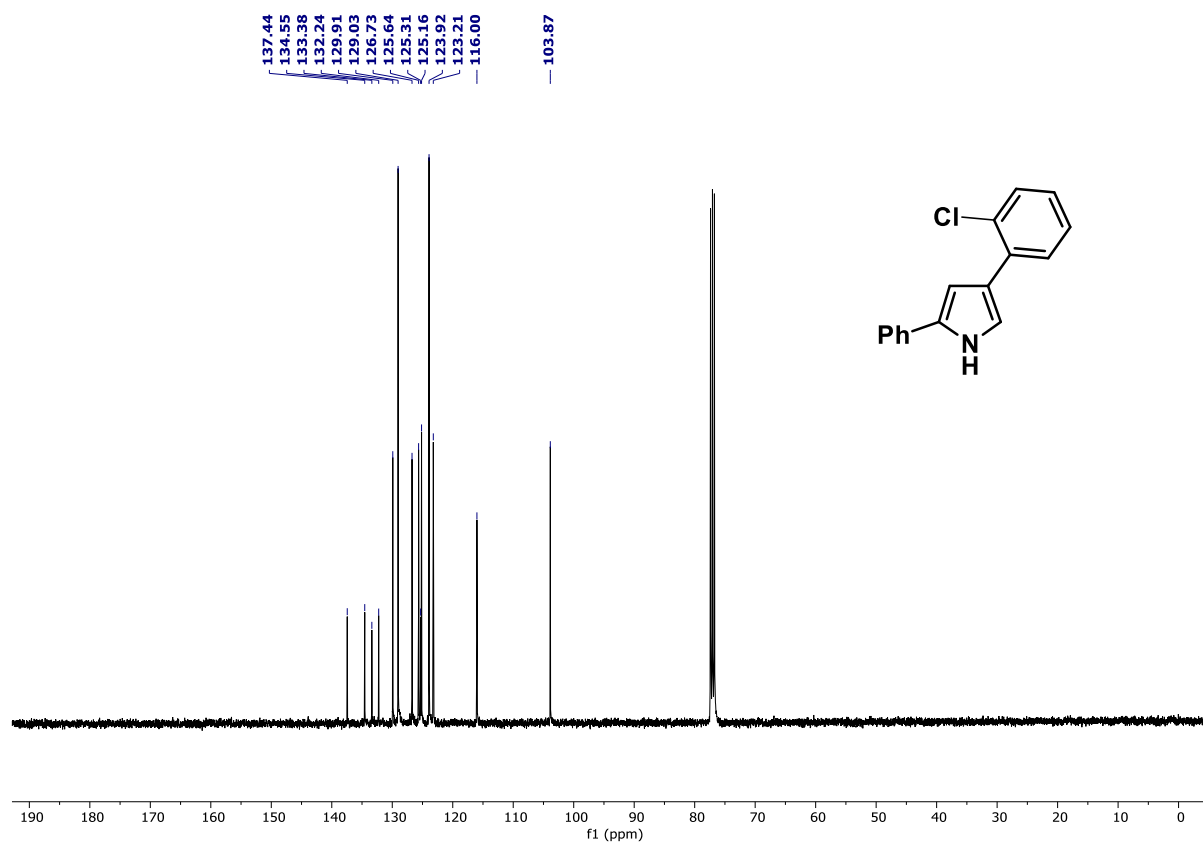

<sup>13</sup>C NMR of 4-(2-chlorophenyl)-2-phenyl-1H-pyrrole (**3k**)



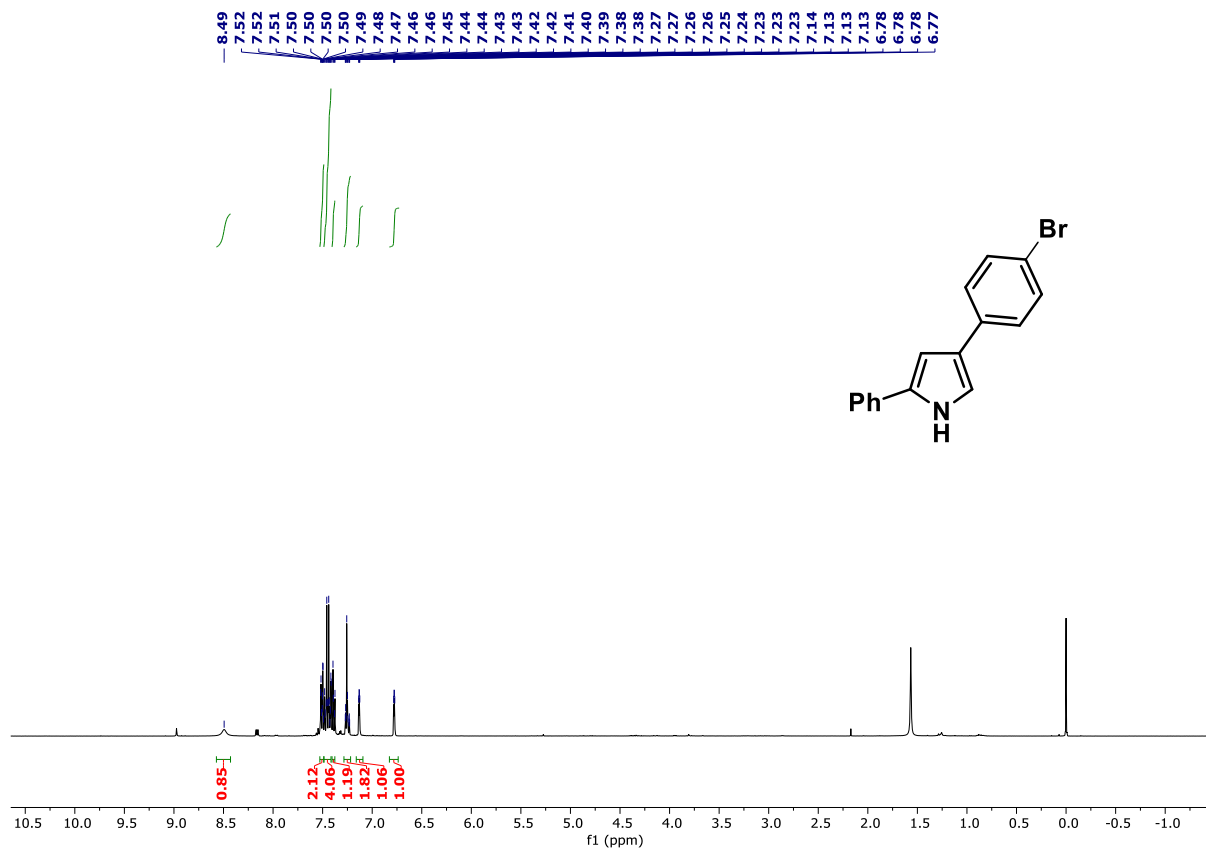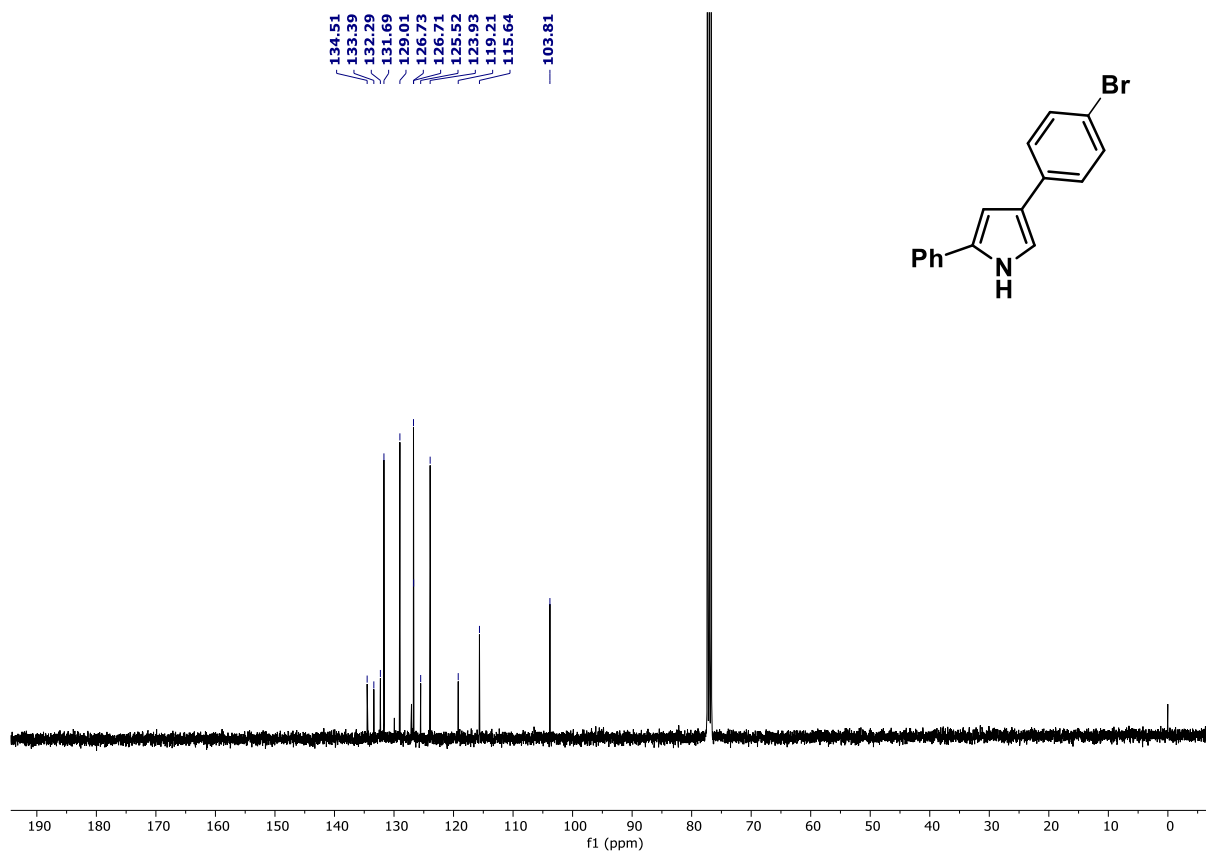

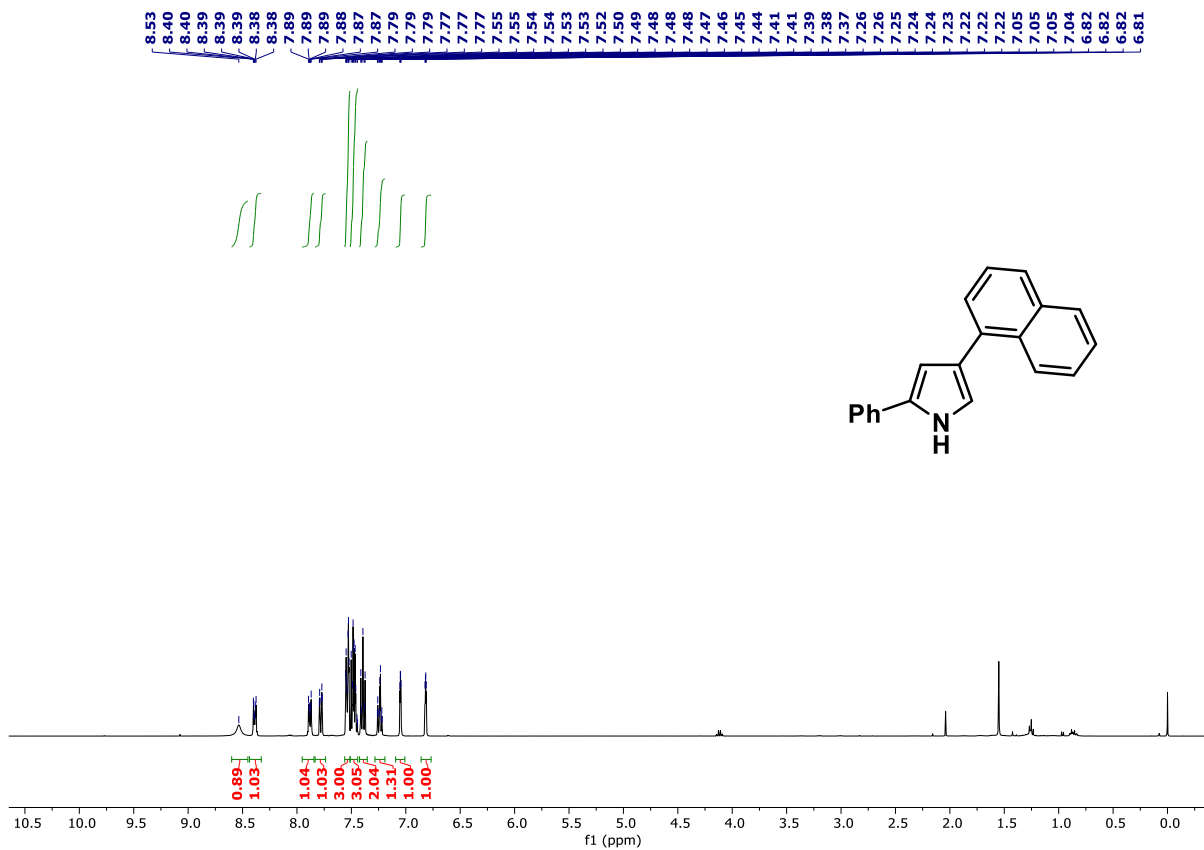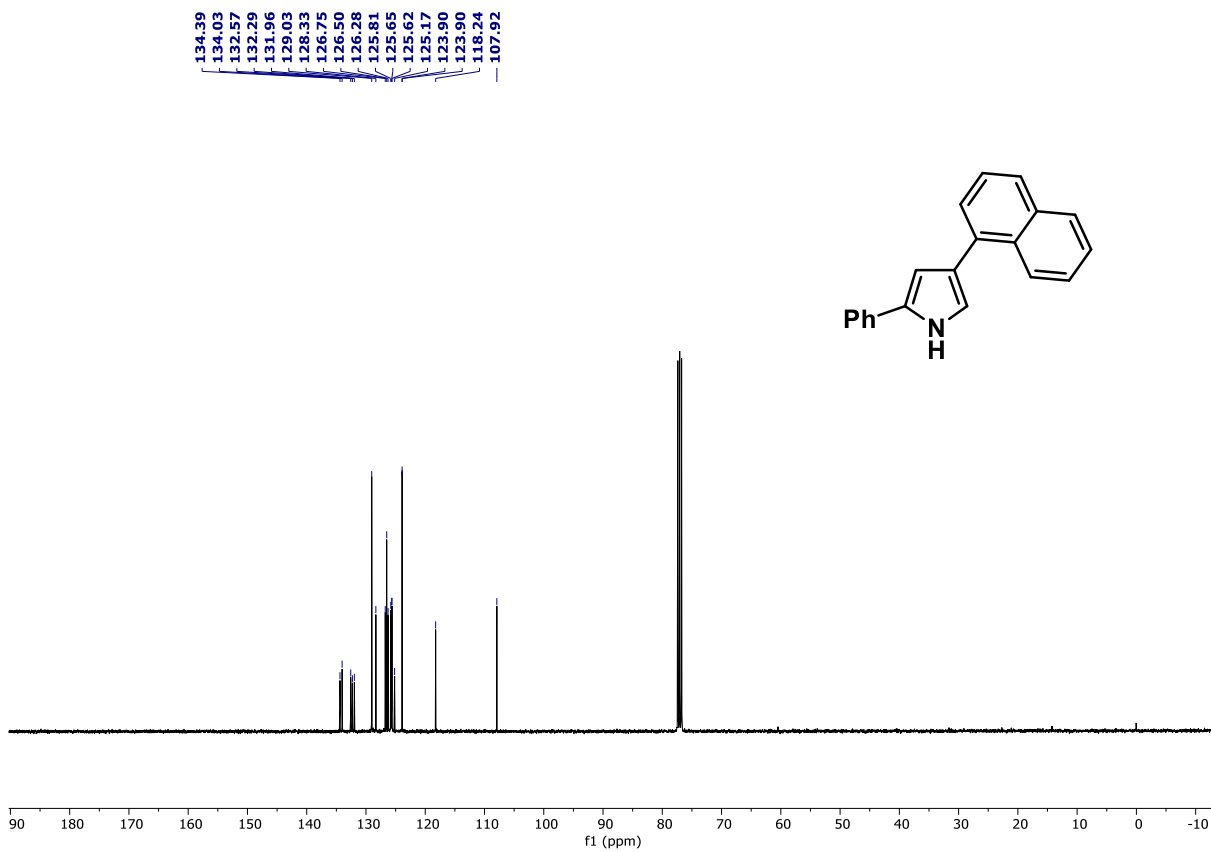

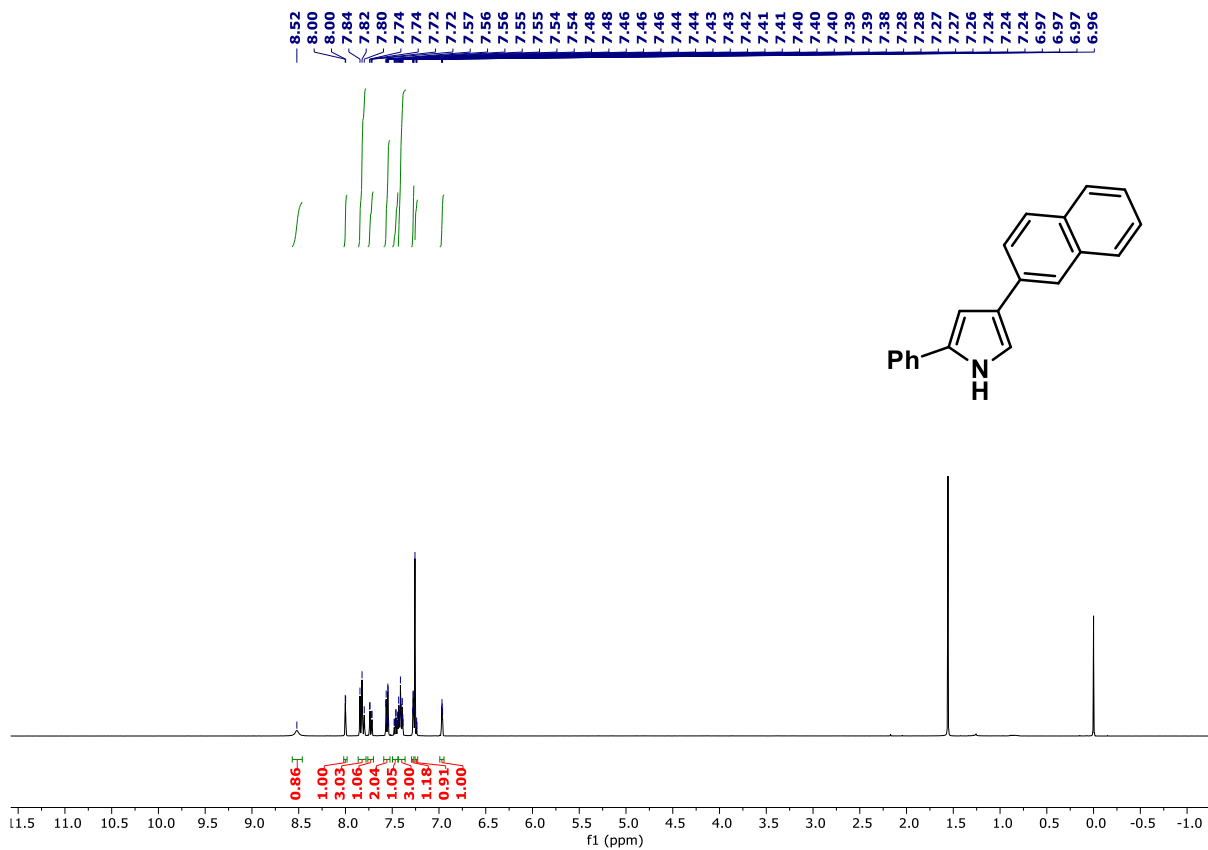

<sup>1</sup>H NMR of 4-(naphthalen-2-yl)-2-phenyl-1H-pyrrole (**3n**)

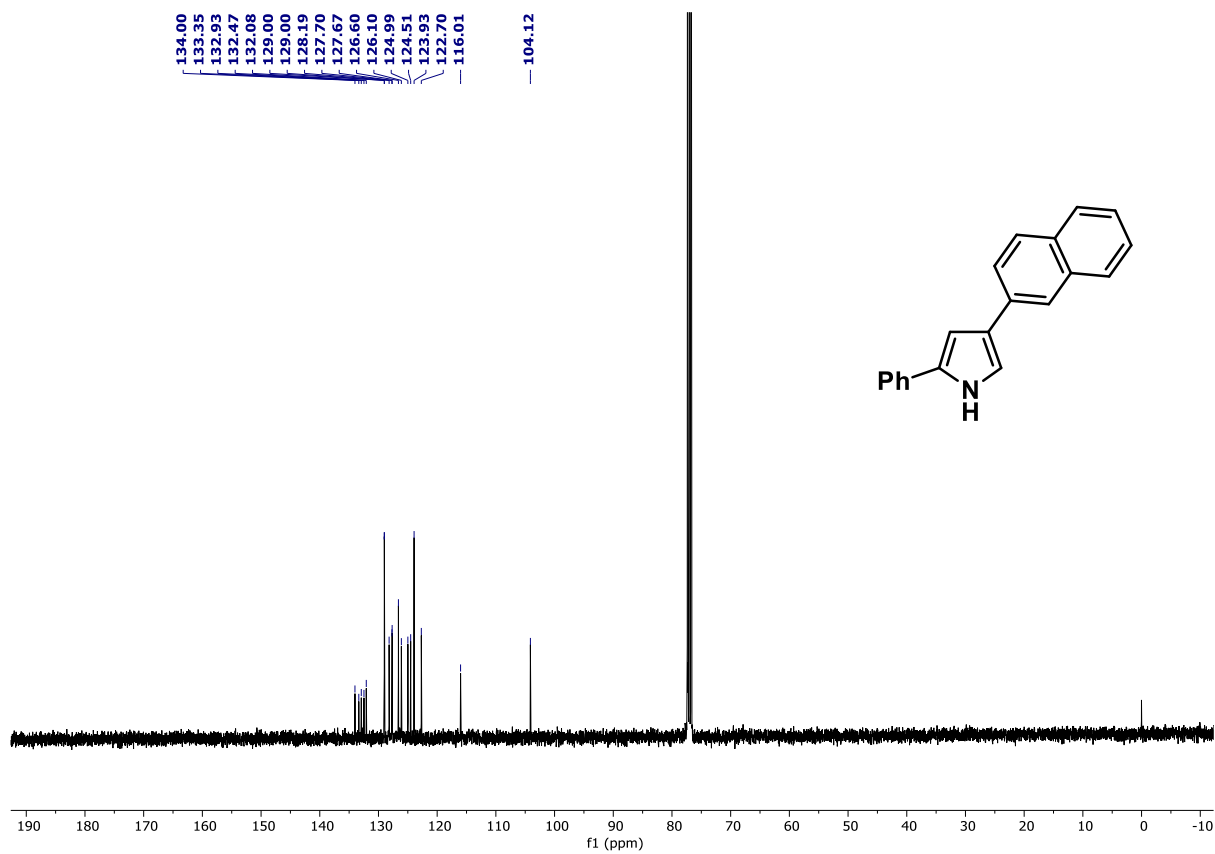

<sup>13</sup>C NMR of 4-(naphthalen-2-yl)-2-phenyl-1H-pyrrole (**3n**)

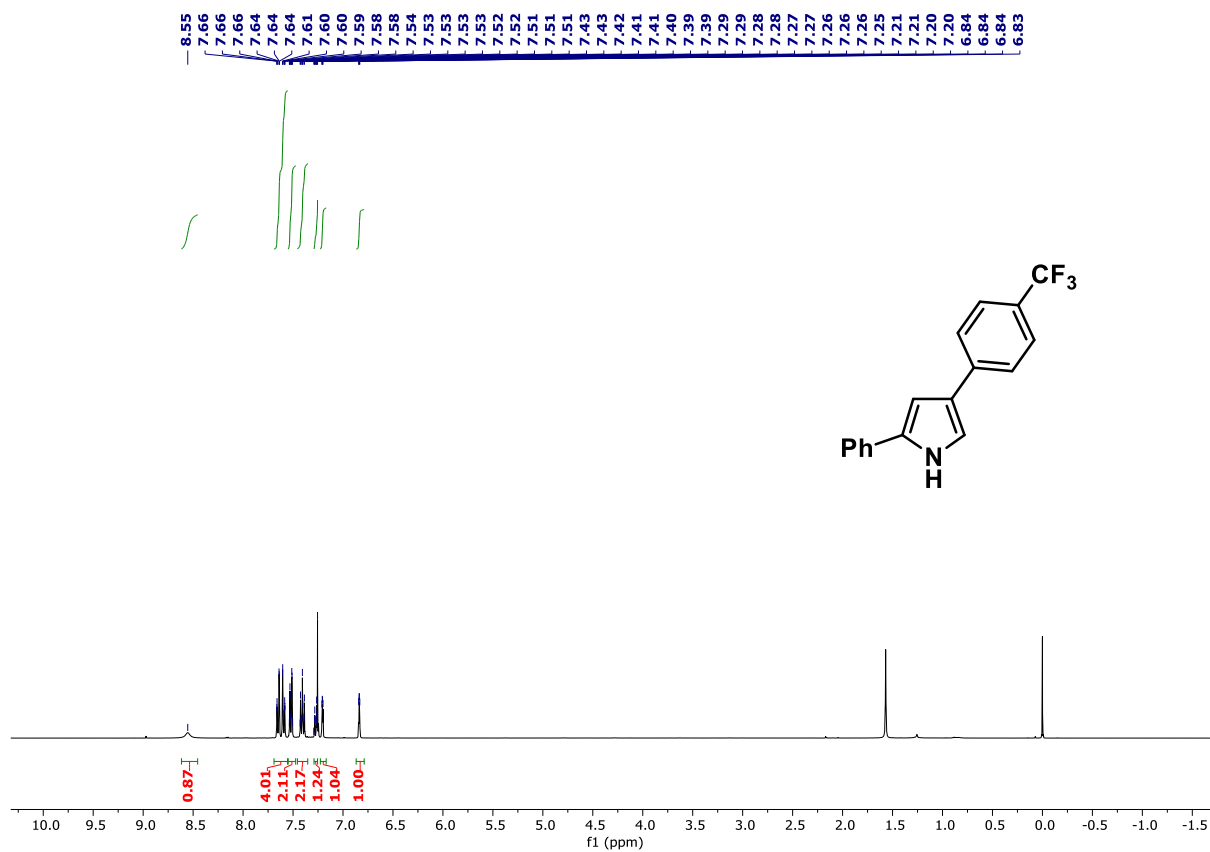

<sup>1</sup>H NMR of 2-phenyl-4-(4-(trifluoromethyl)phenyl)-1H-pyrrole (30)

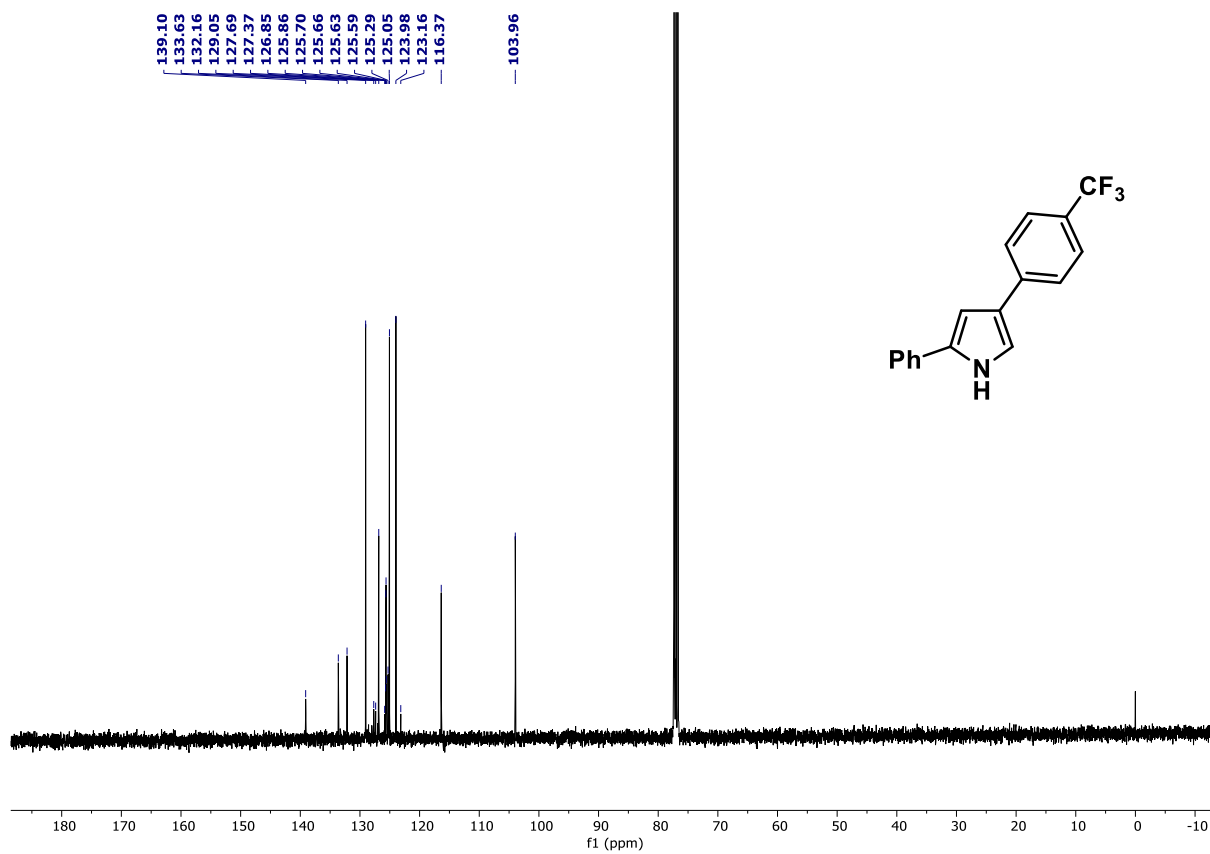

<sup>13</sup>C NMR of 2-phenyl-4-(4-(trifluoromethyl)phenyl)-1H-pyrrole (30)

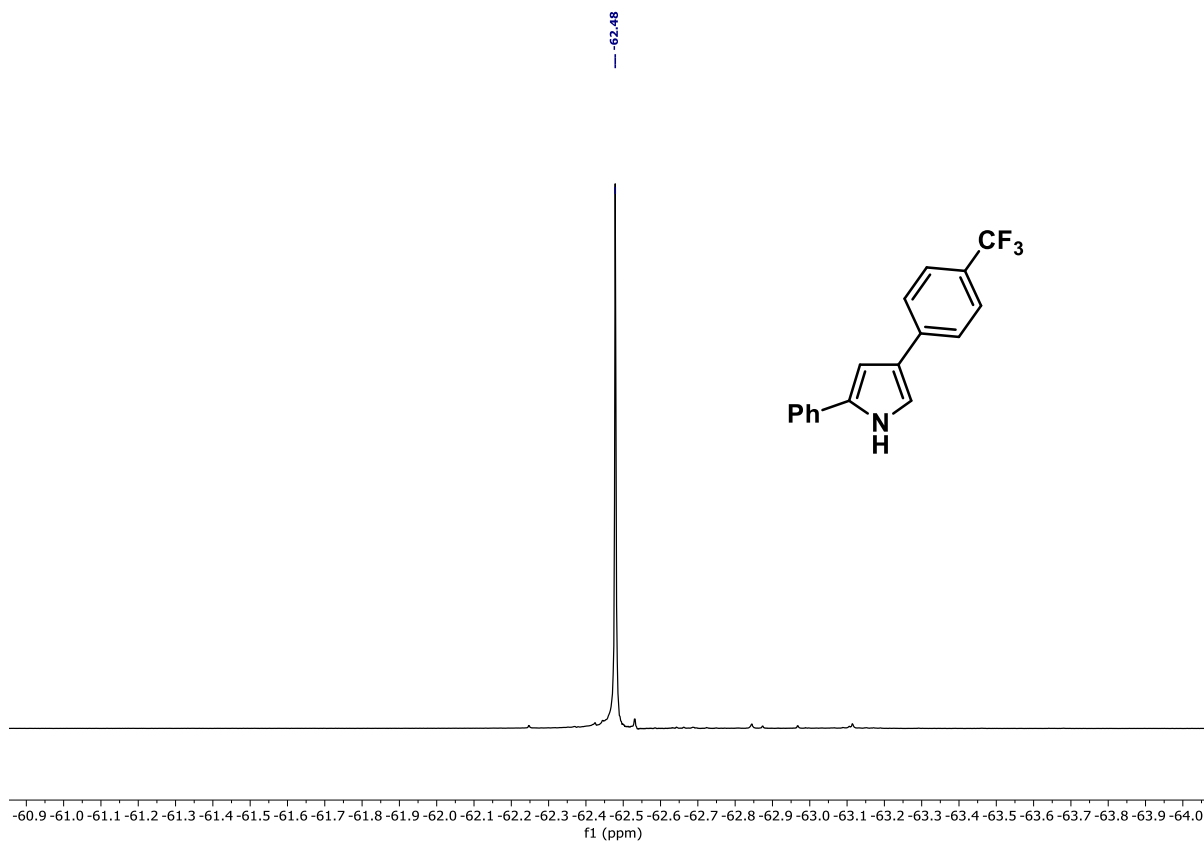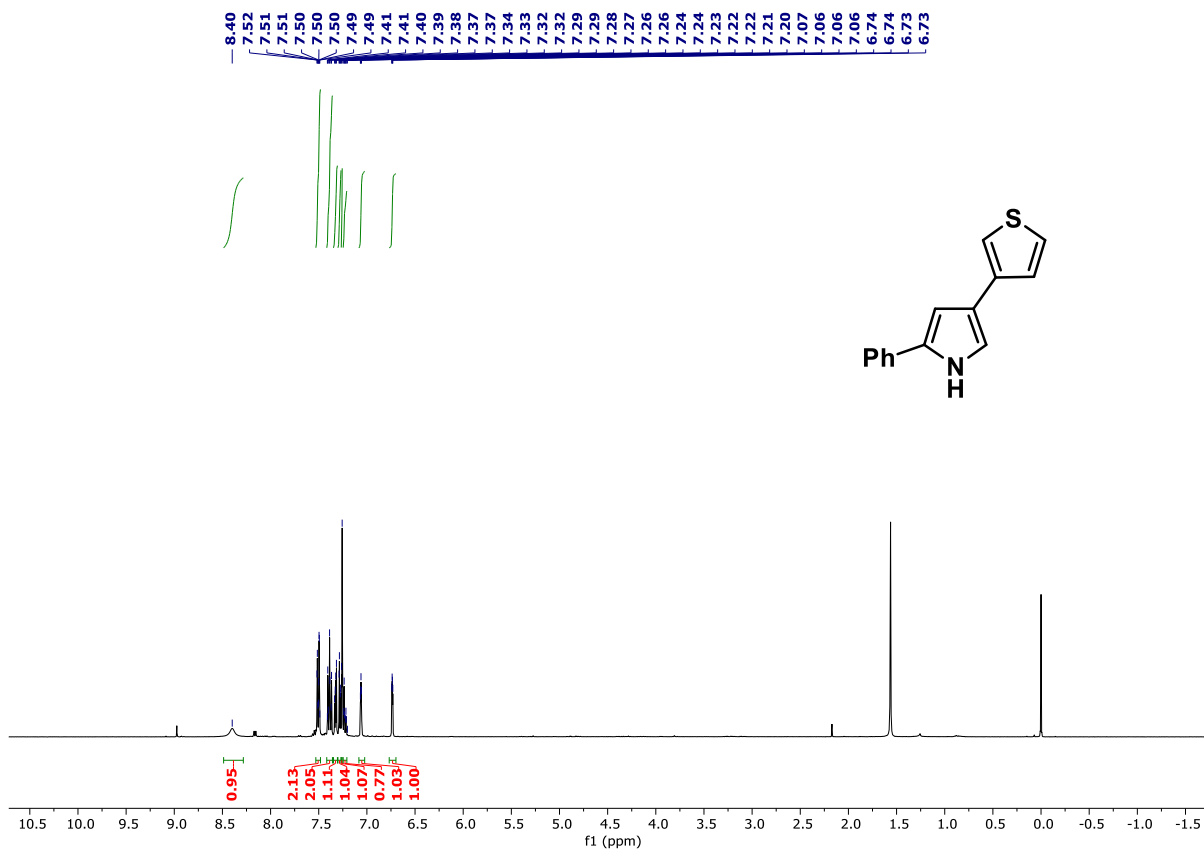

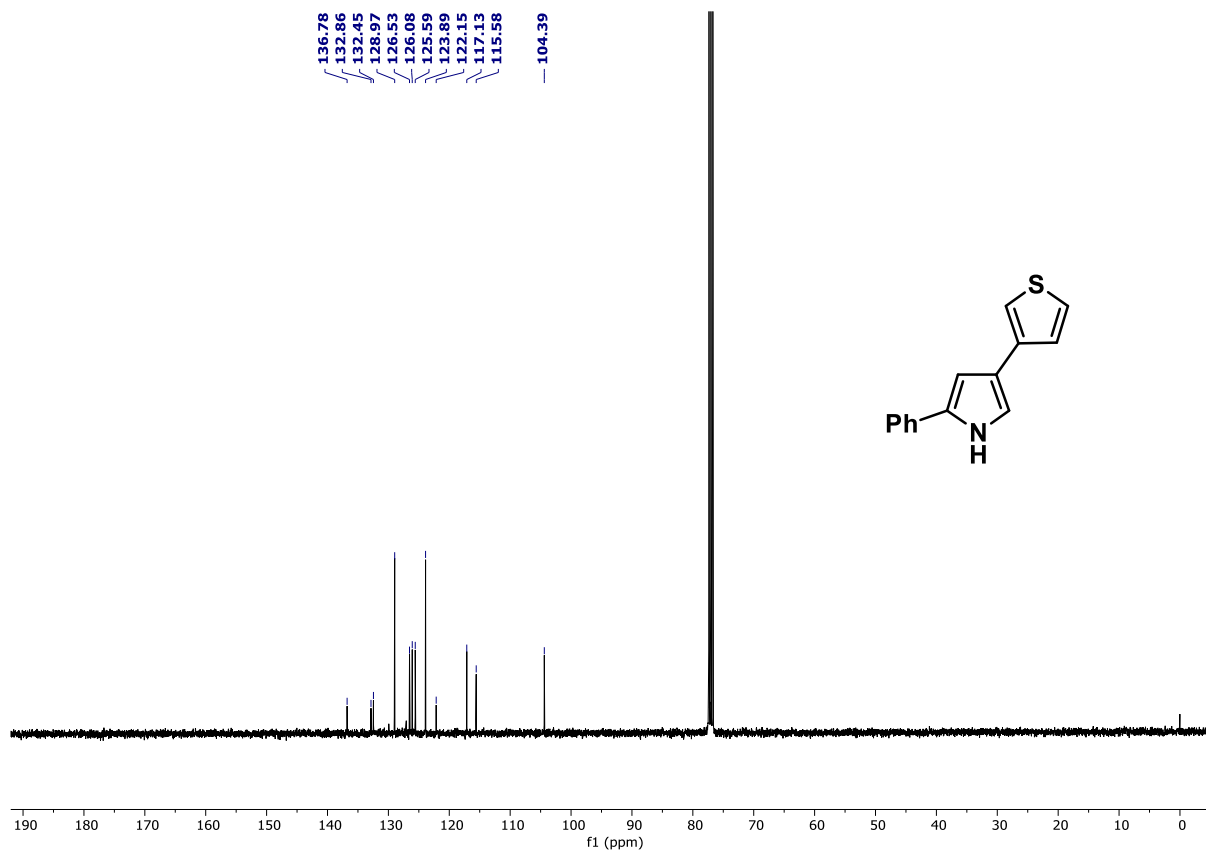

$^{13}\text{C}$  NMR of 2-phenyl-4-(thiophen-3-yl)-1H-pyrrole (**3p**)

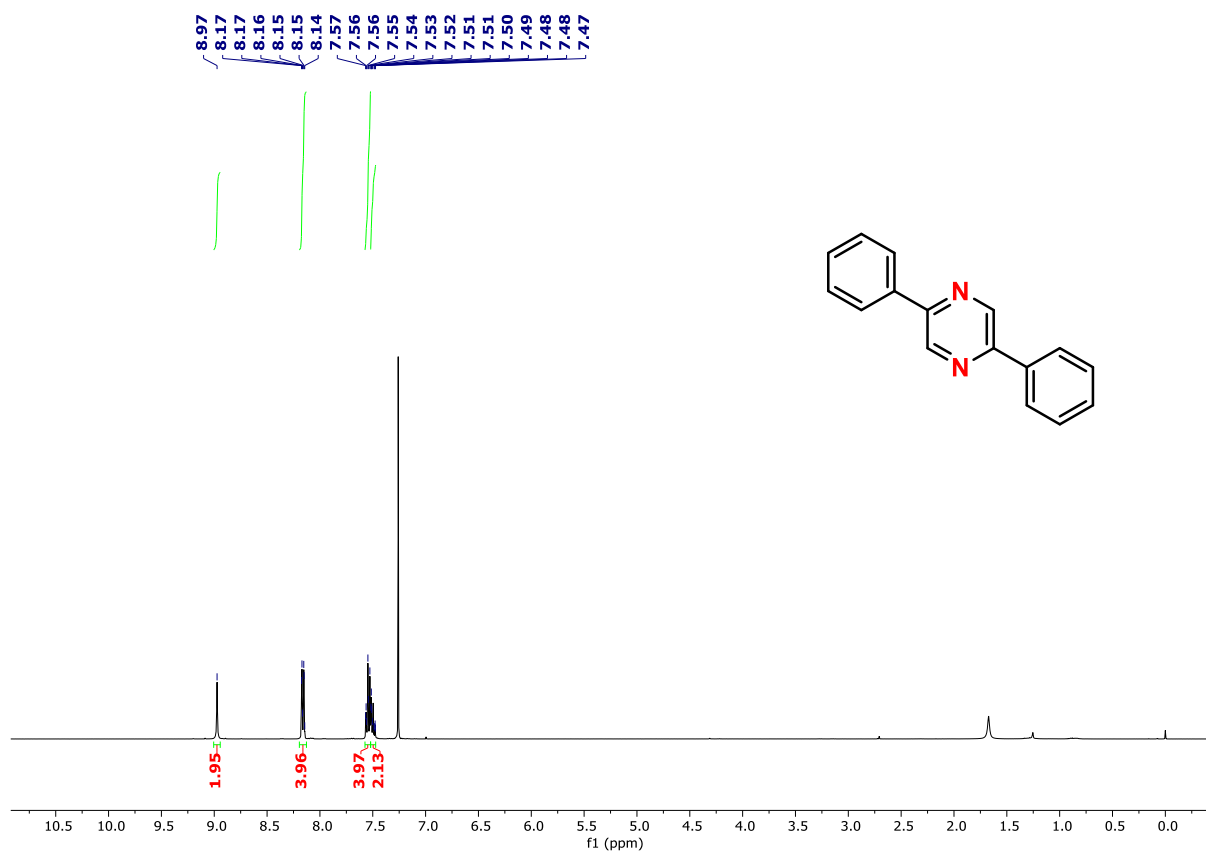

$^1\text{H}$  NMR of 2,5-diphenylpyrazine (**4a**)

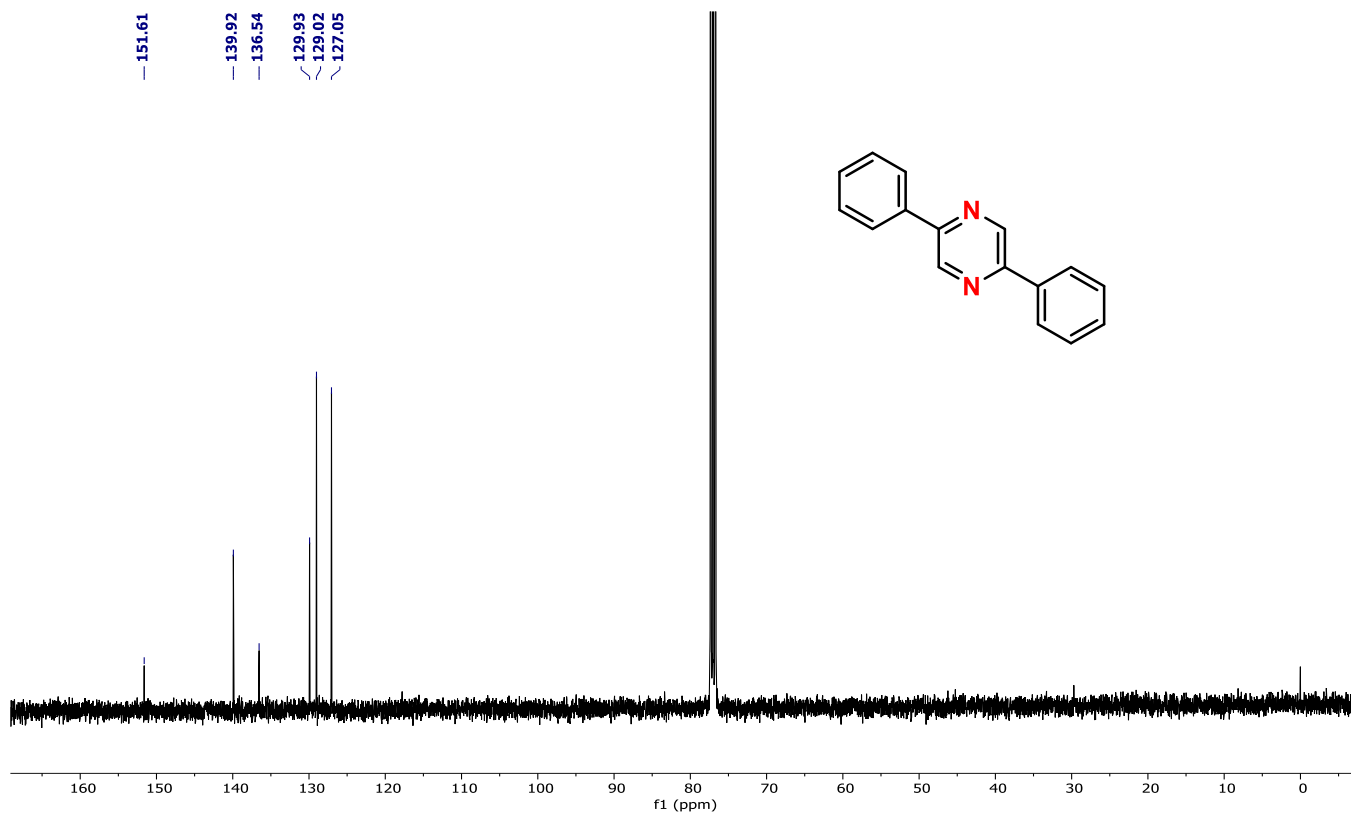

$^{13}\text{C}$  NMR of 2,5-diphenylpyrazine (**4a**)

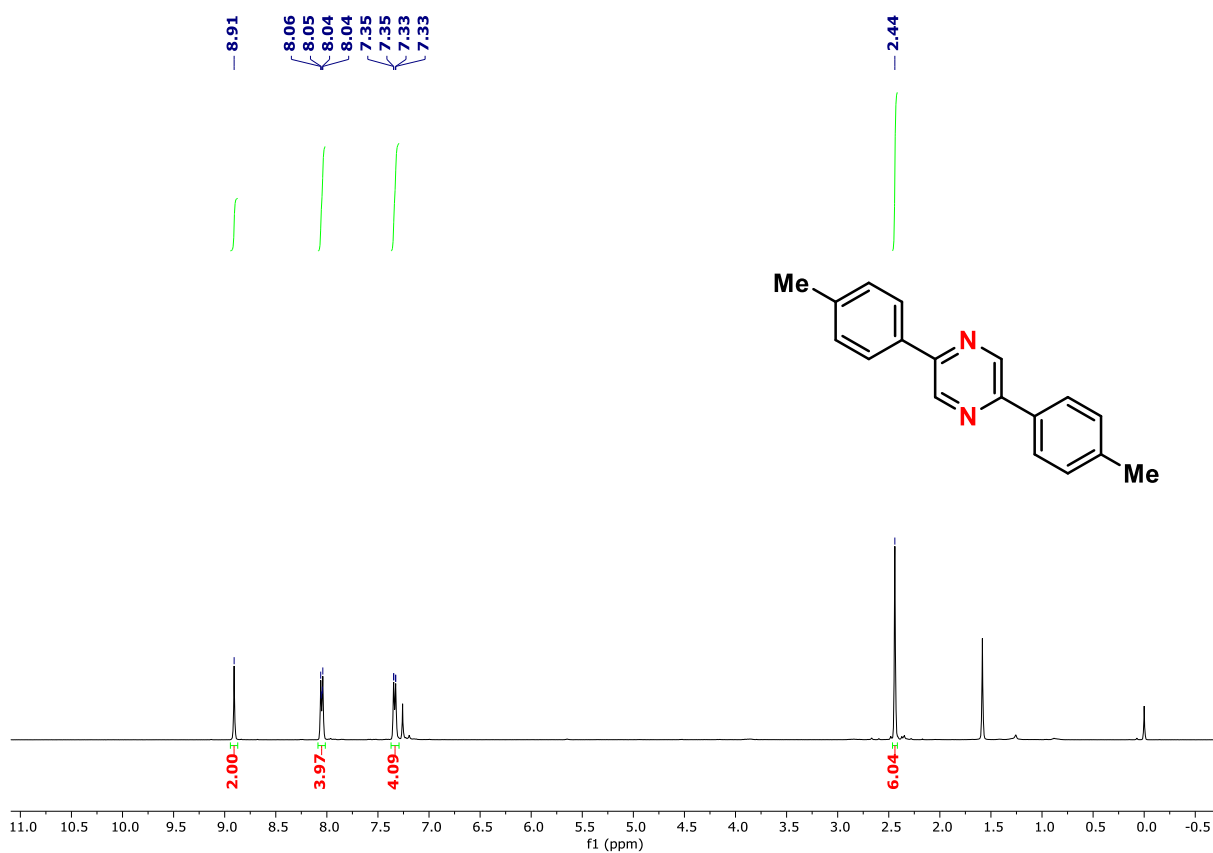

$^1\text{H}$  NMR of 2,5-di-p-tolylpyrazine (**4b**)

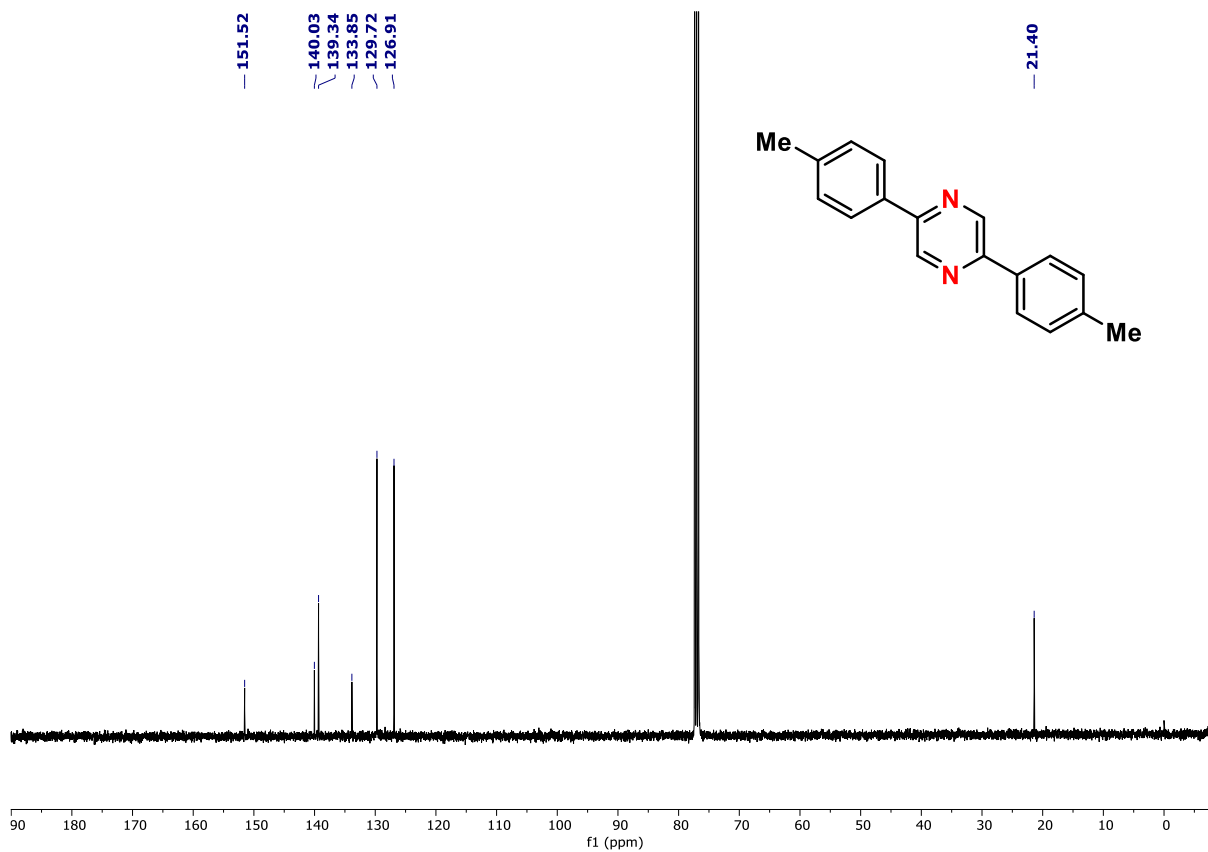

<sup>13</sup>C NMR of 2,5-di-p-tolypyrazine (**4b**)

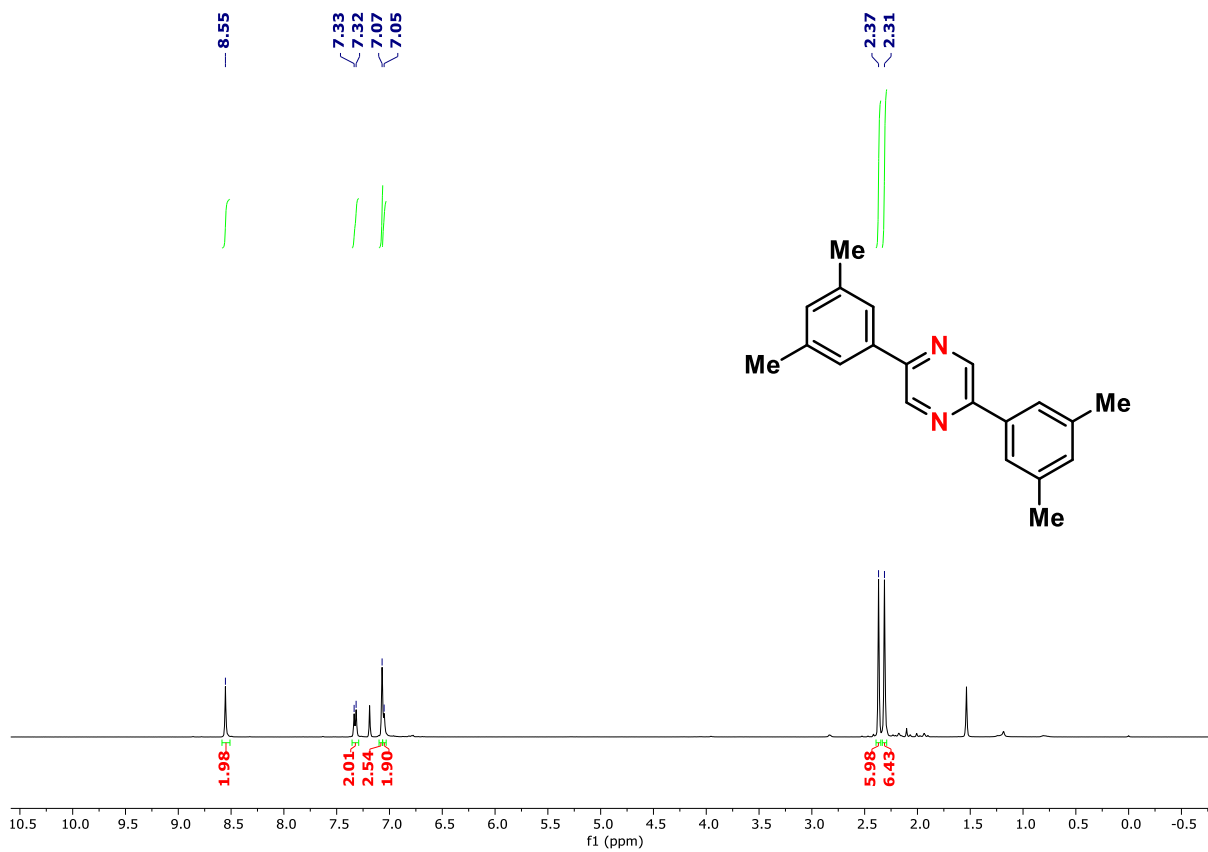

<sup>1</sup>H NMR of 2,5-bis(3,5-dimethylphenyl)pyrazine (**4c**)



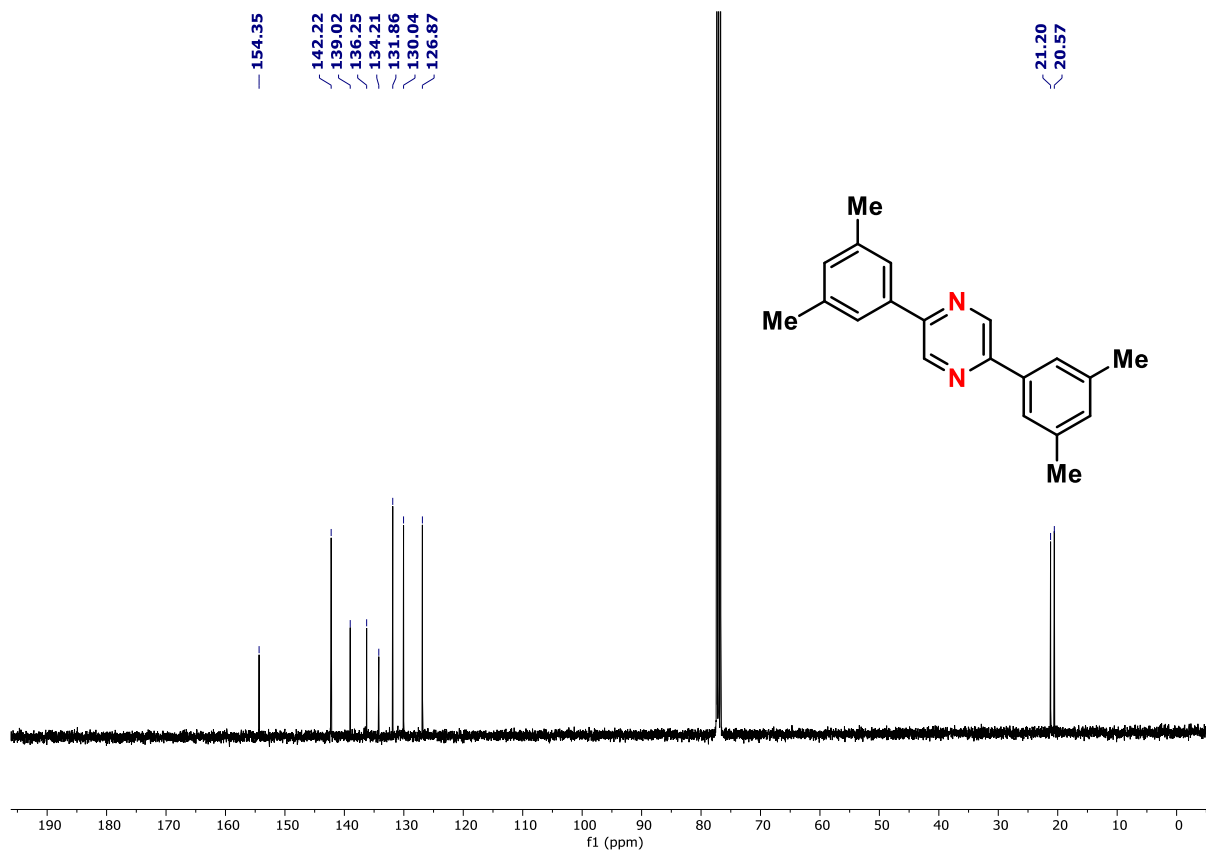

<sup>13</sup>C NMR of 2,5-bis(3,5-dimethylphenyl)pyrazine (4c)

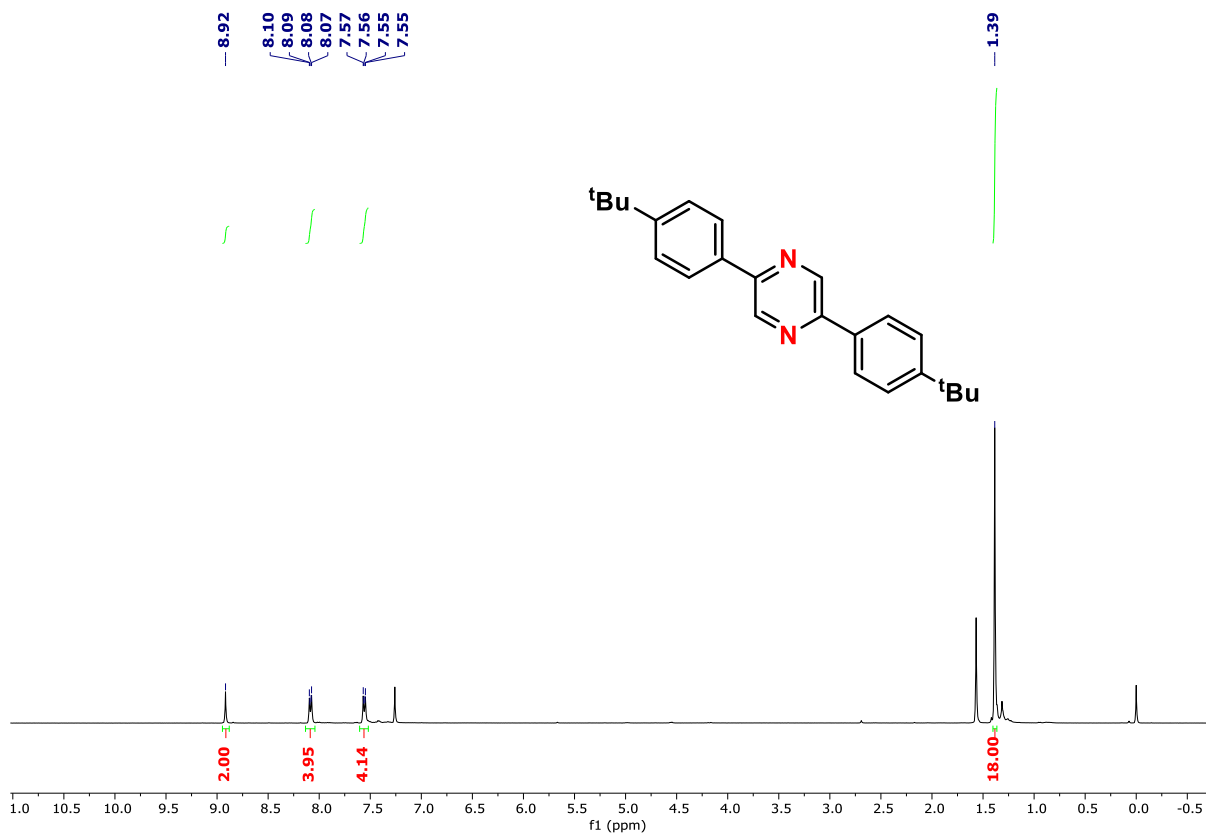

<sup>1</sup>H NMR of 2,5-bis(4-(tert-butyl)phenyl)pyrazine (4d)

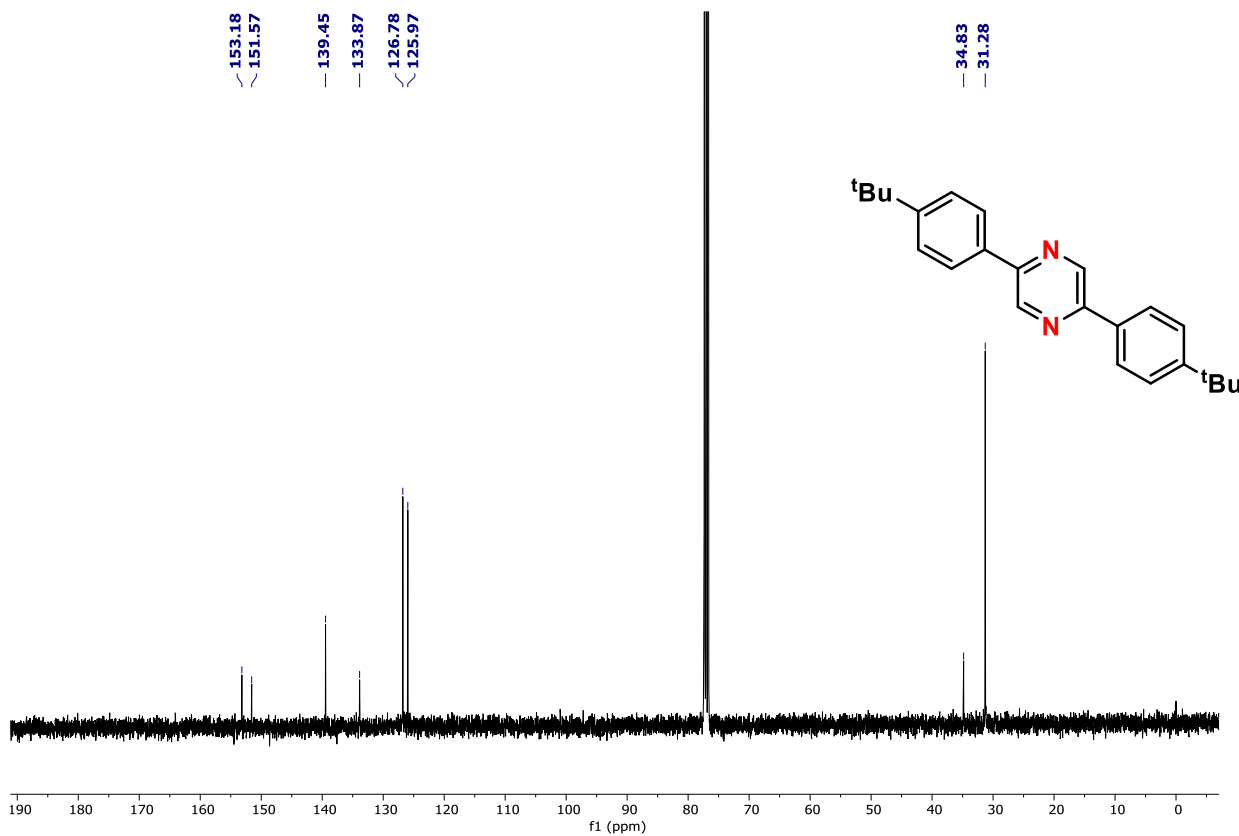

<sup>13</sup>C NMR of 2,5-bis(4-(tert-butyl)phenyl)pyrazine (4d)

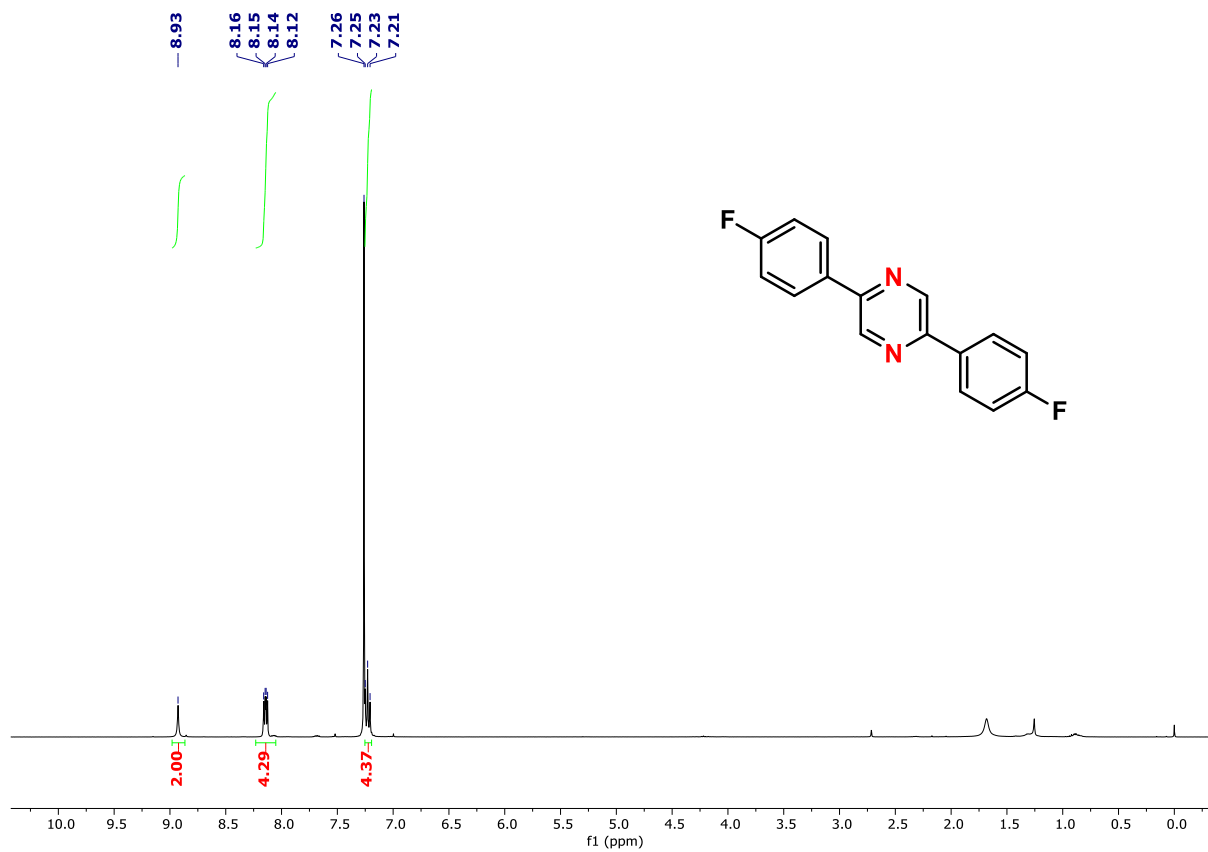

<sup>1</sup>H NMR of 2,5-bis(4-fluorophenyl)pyrazine (4e)

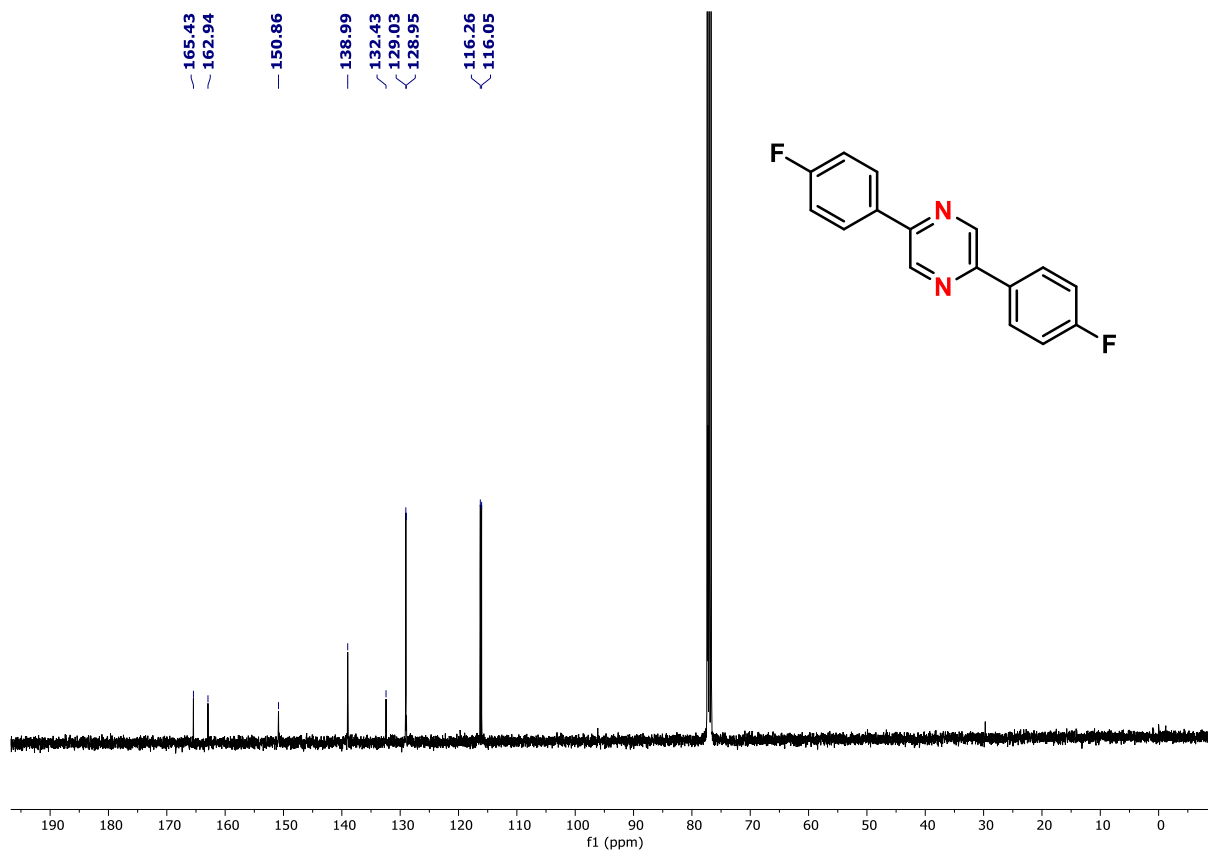

<sup>13</sup>C NMR of 2,5-bis(4-fluorophenyl)pyrazine (4e)

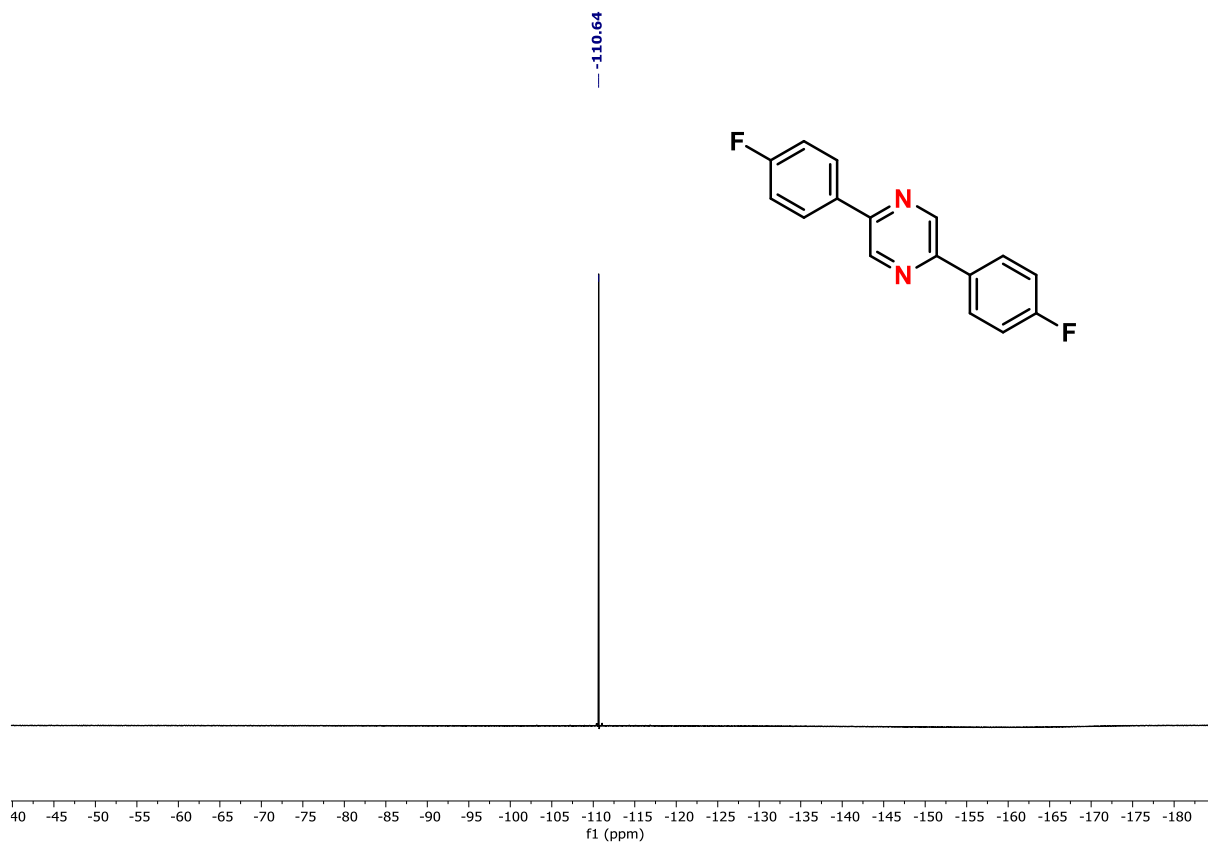

<sup>19</sup>F NMR of 2,5-bis(4-fluorophenyl)pyrazine (4e)

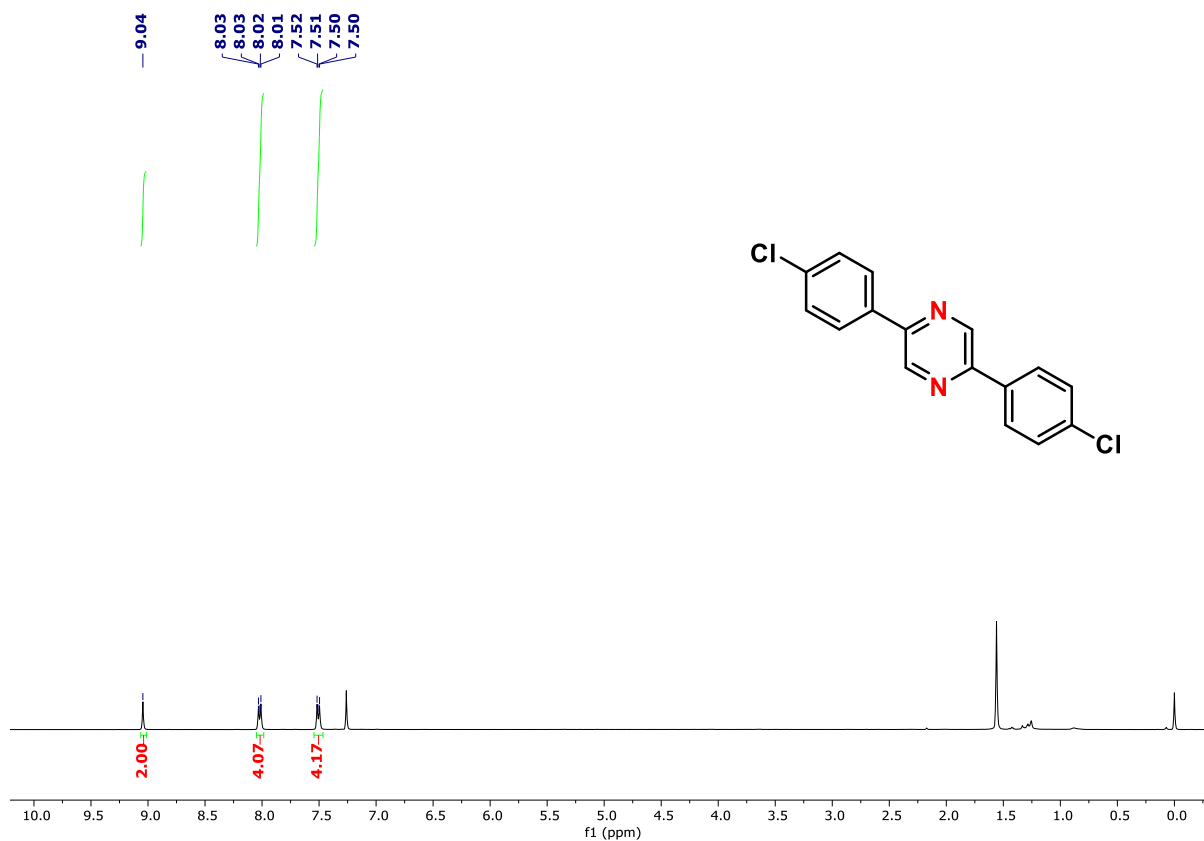

<sup>1</sup>H NMR of 2,5-bis(4-chlorophenyl)pyrazine (**4f**)

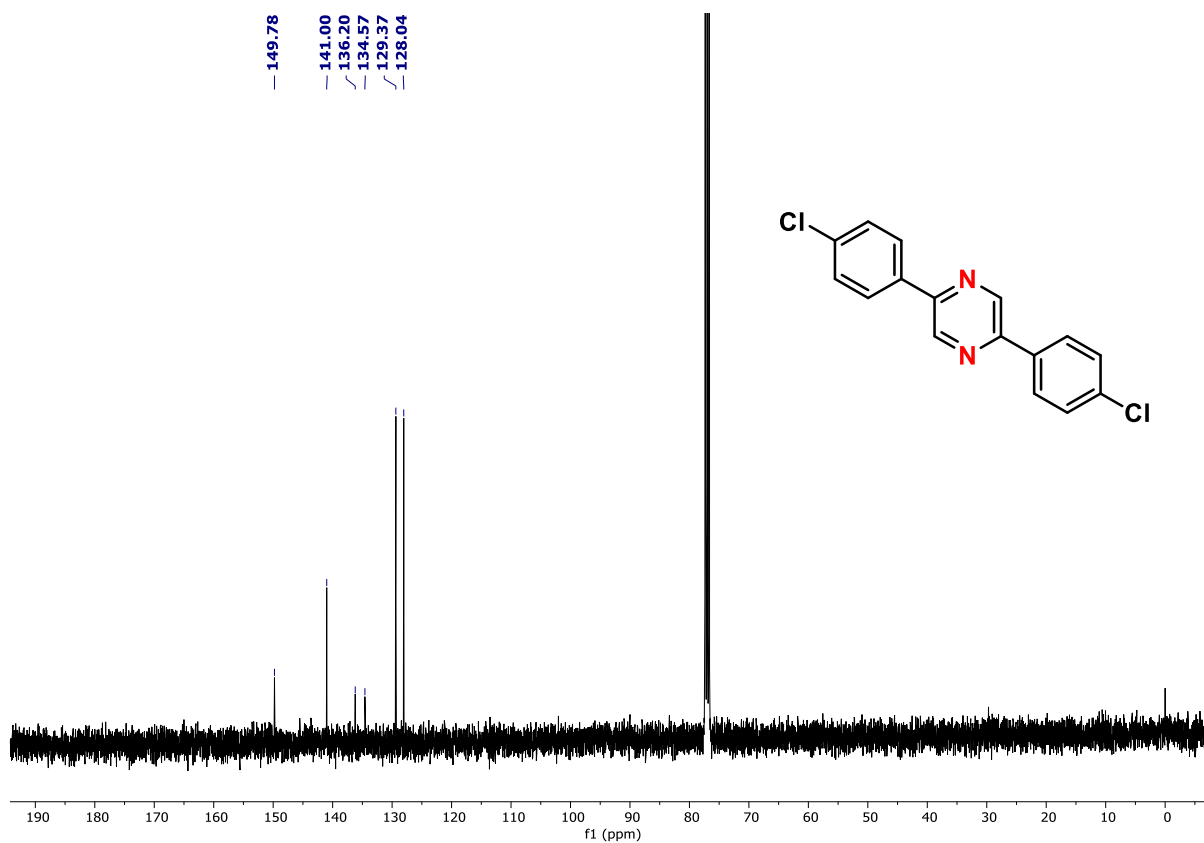

<sup>13</sup>C NMR of 2,5-bis(4-chlorophenyl)pyrazine (**4f**)

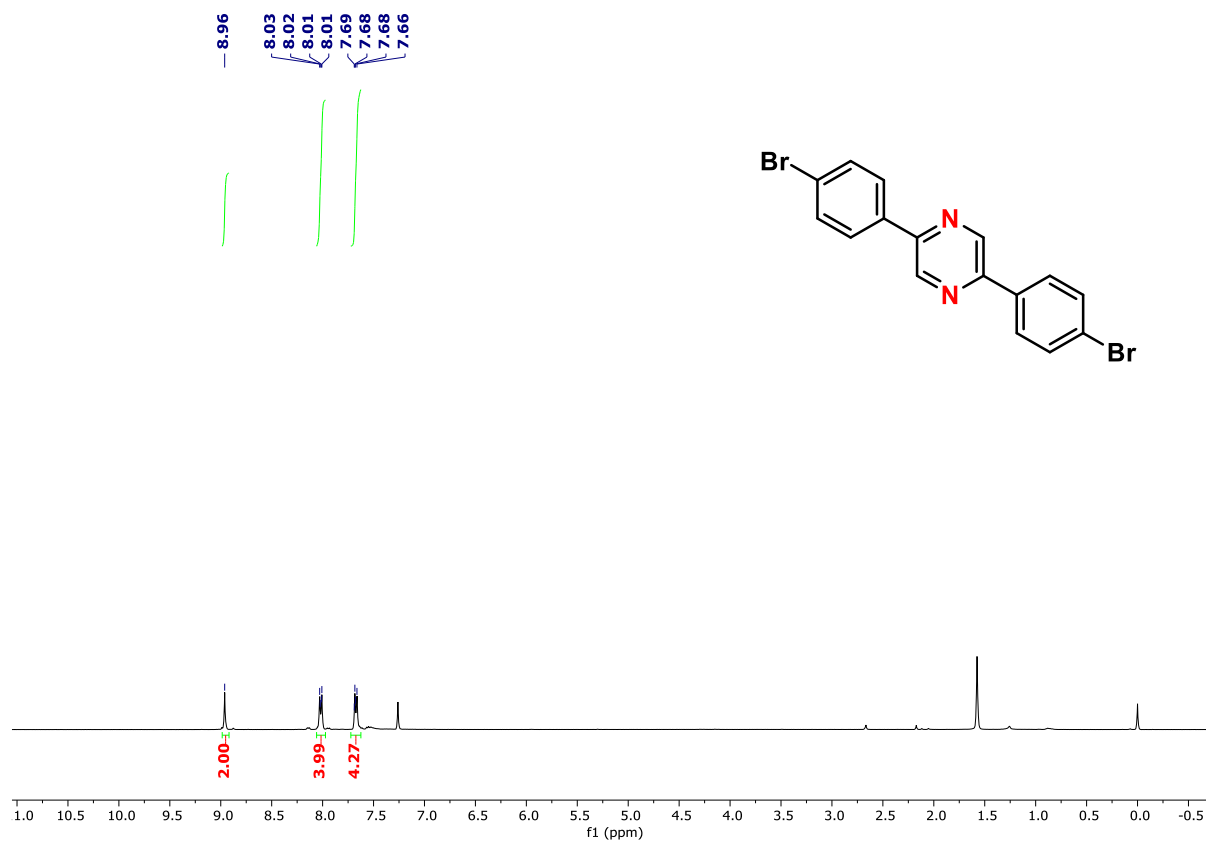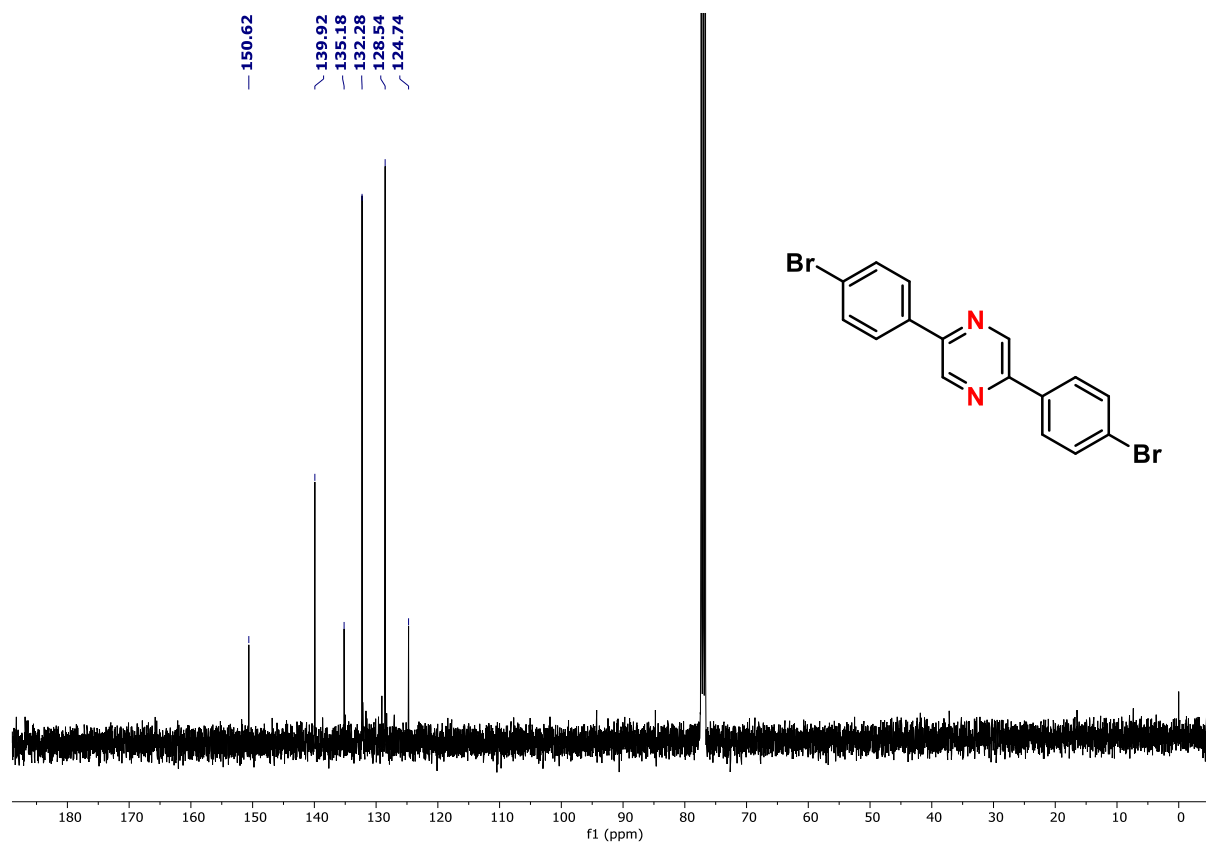

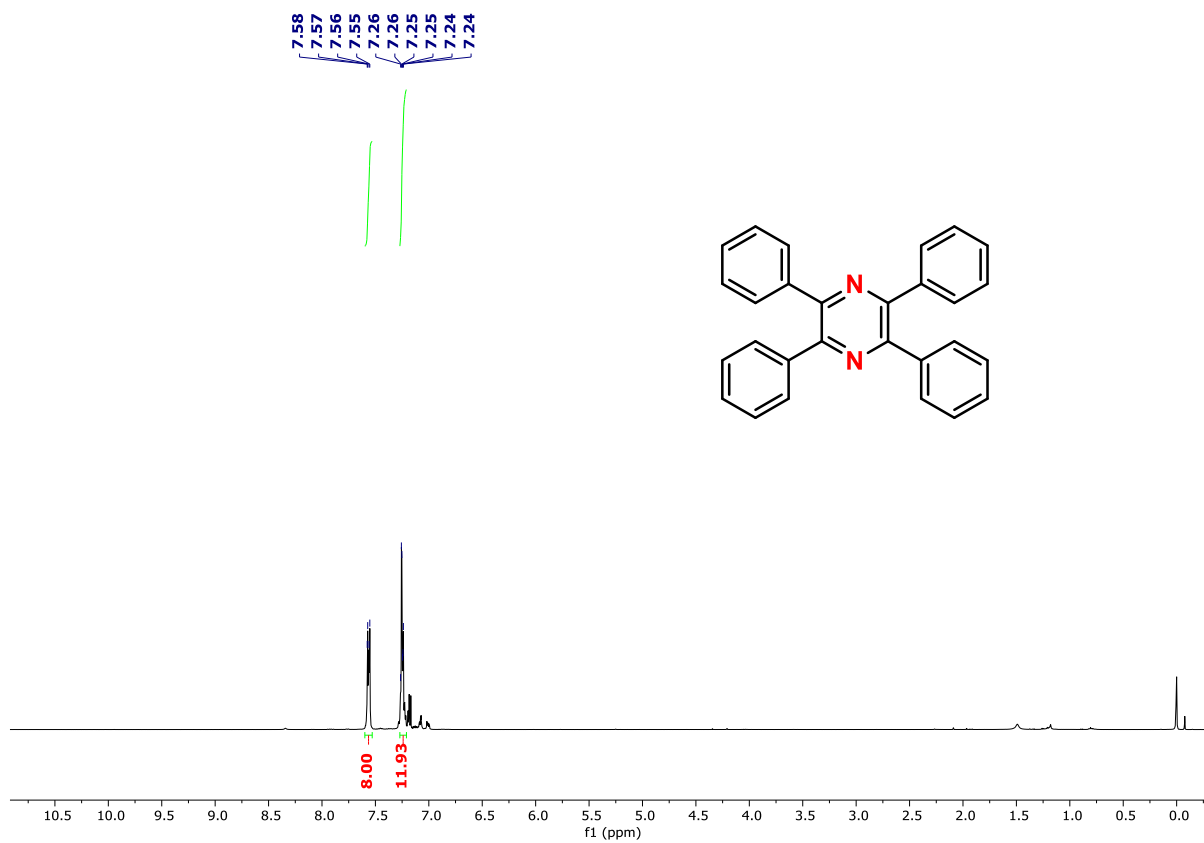

$^1\text{H}$  NMR of 2,3,5,6-tetraphenylpyrazine (**4h**)

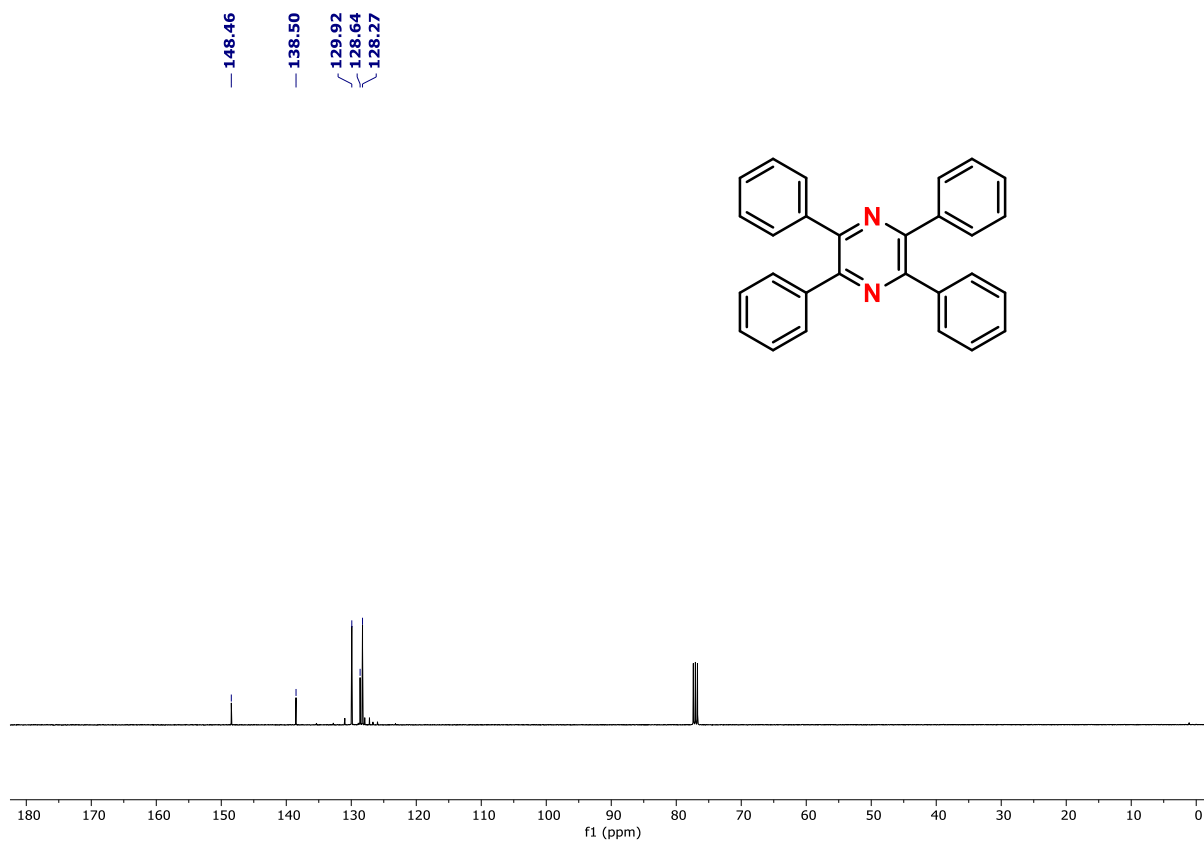

$^{13}\text{C}$  NMR of 2,3,5,6-tetraphenylpyrazine (**4h**)

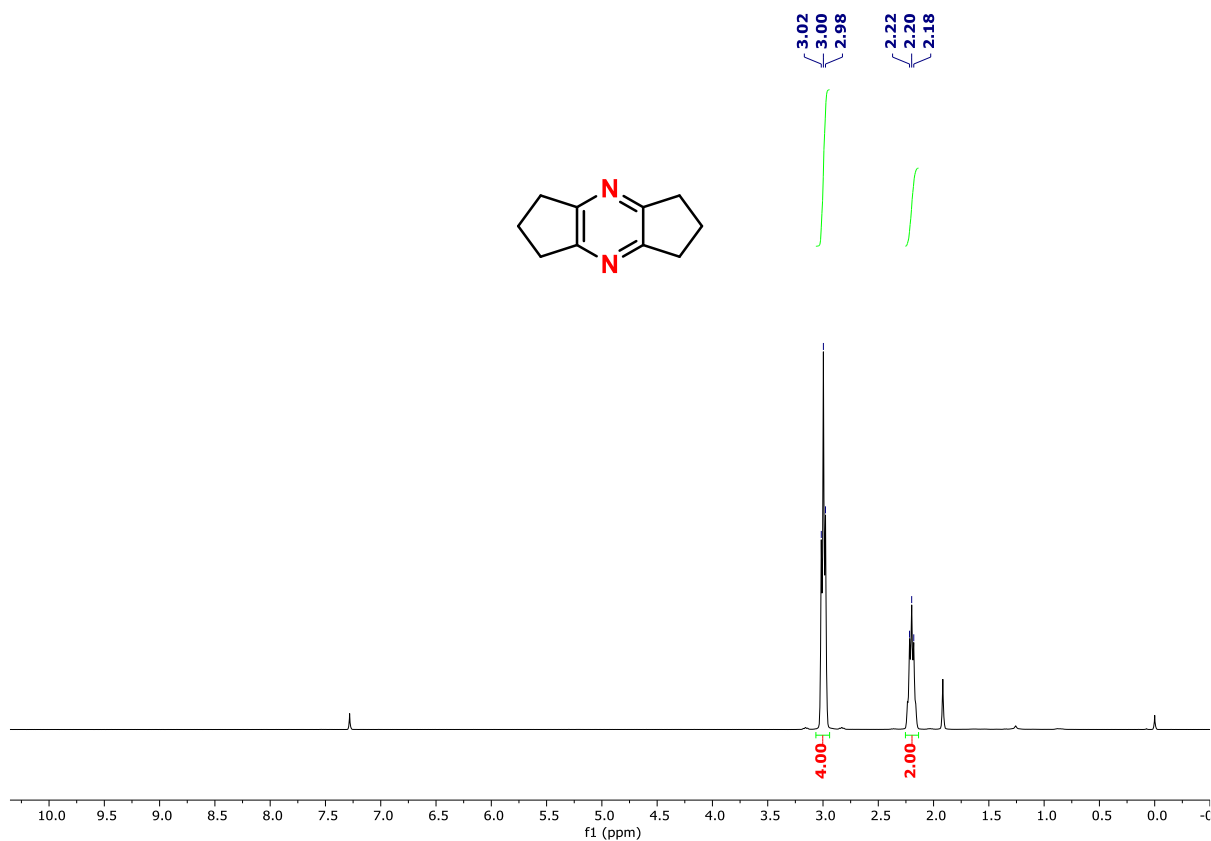

**<sup>1</sup>H NMR of 1,2,3,5,6,7-hexahydrodicyclopenta[b,e]pyrazine (4i)**

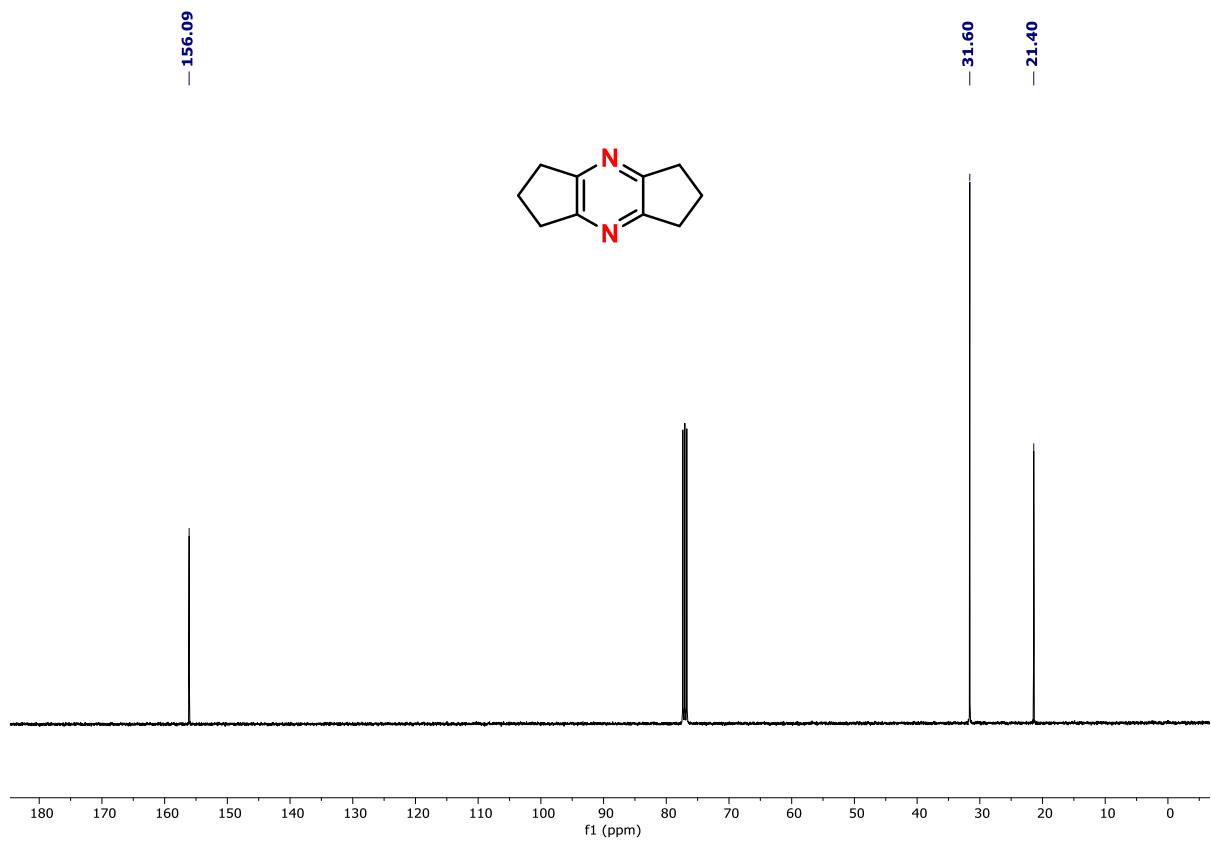

**<sup>13</sup>C NMR of 1,2,3,5,6,7-hexahydrodicyclopenta[b,e]pyrazine (4i)**

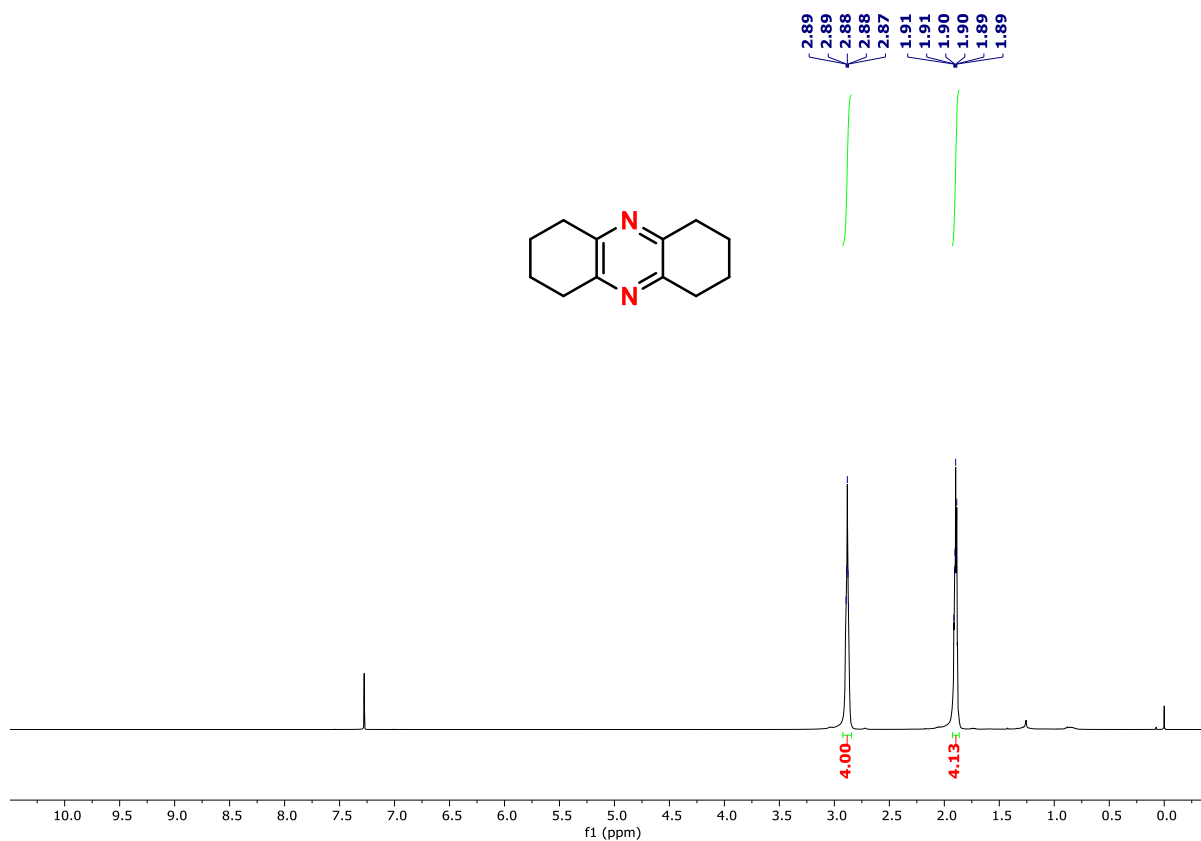

$^1\text{H}$  NMR of 1,2,3,4,6,7,8,9-octahydrophenazine (**4j**)

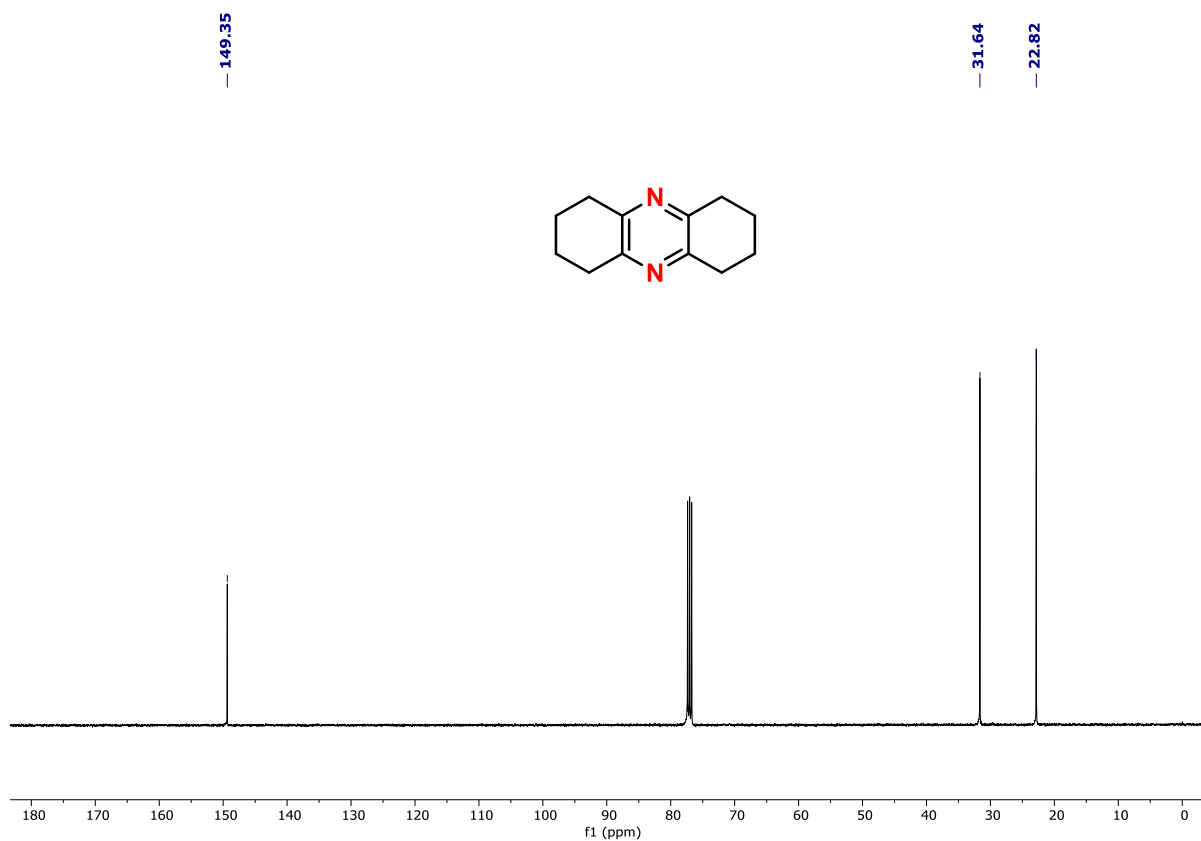

$^{13}\text{C}$  NMR of 1,2,3,4,6,7,8,9-octahydrophenazine (**4j**)



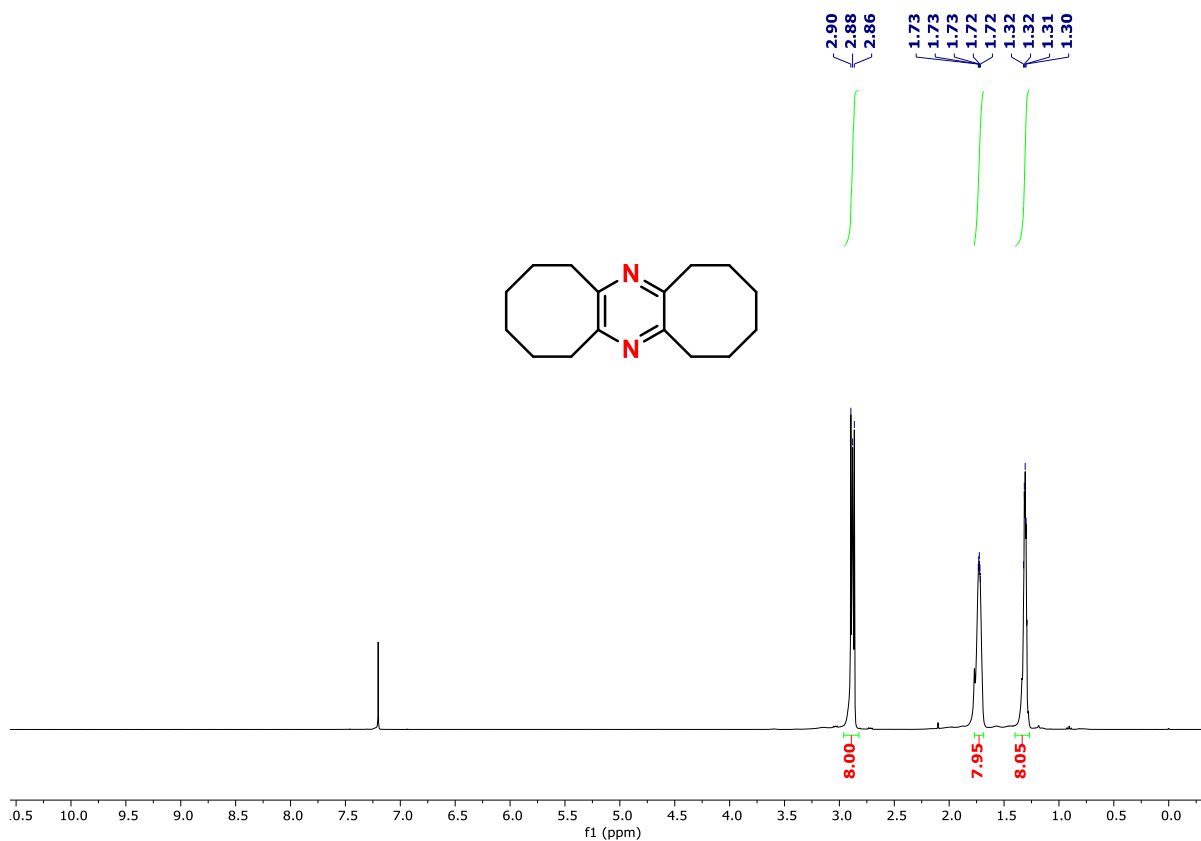

$^1\text{H}$  NMR of 1,2,3,4,5,6,8,9,10,11,12,13-dodecahydrodicycloocta[b,e]pyrazine (**4k**)

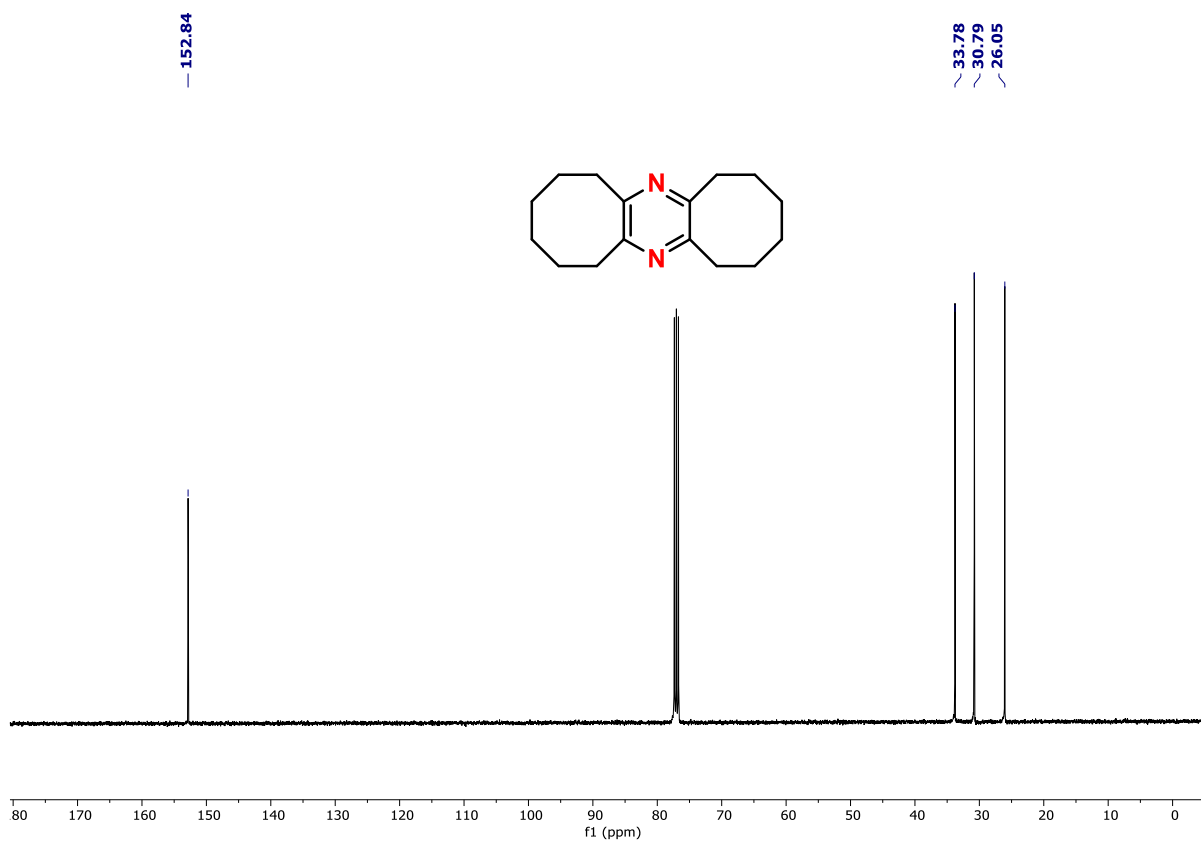

$^{13}\text{C}$  NMR of 1,2,3,4,5,6,8,9,10,11,12,13-dodecahydrodicycloocta[b,e]pyrazine (**4k**)

# FTIR

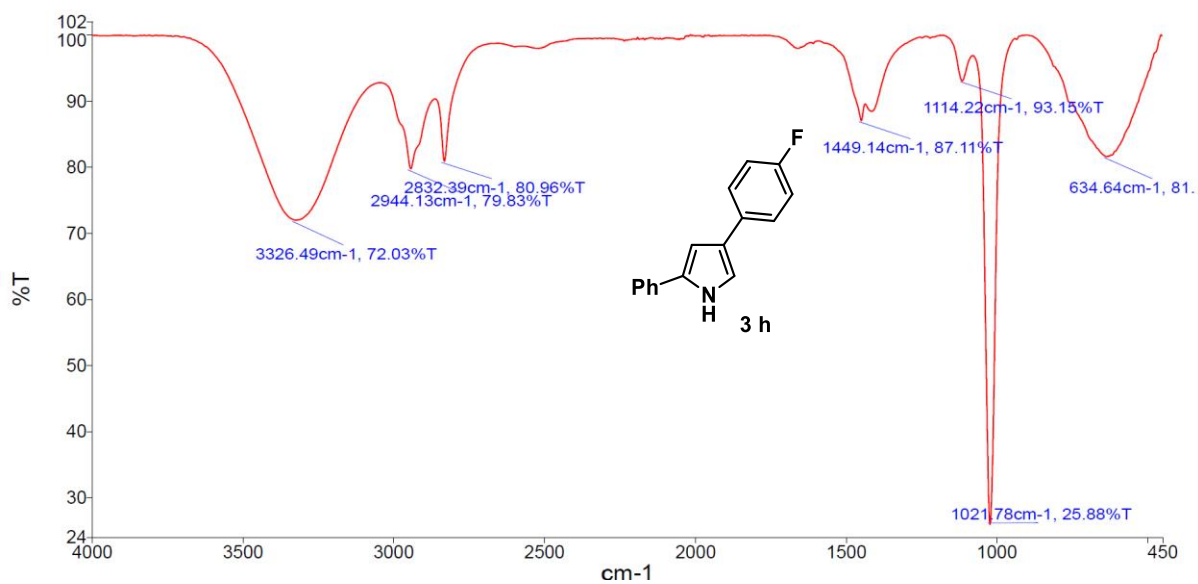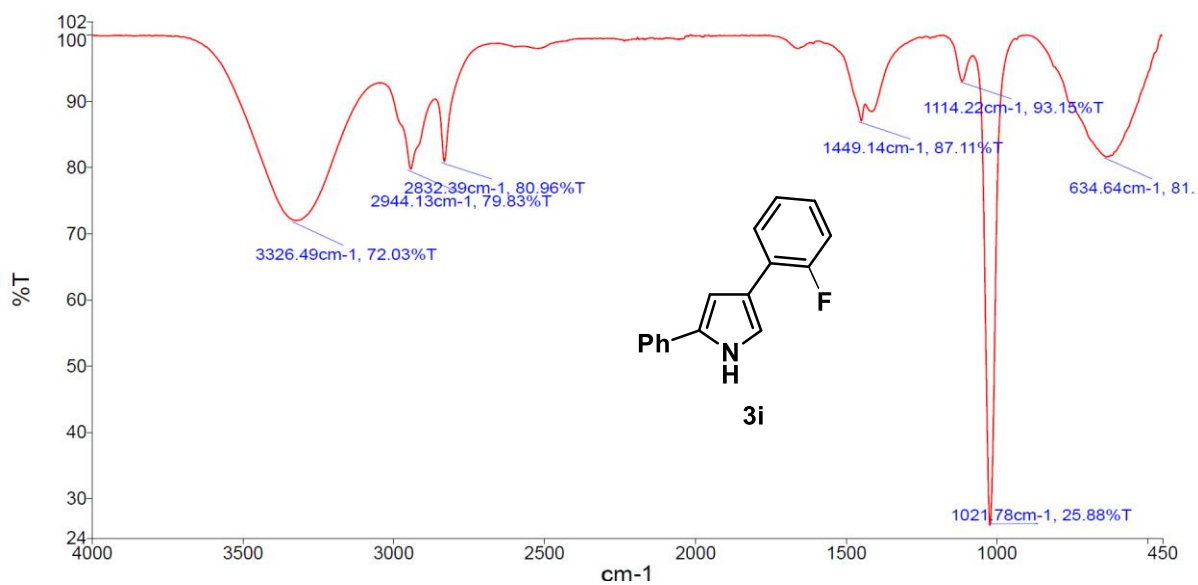

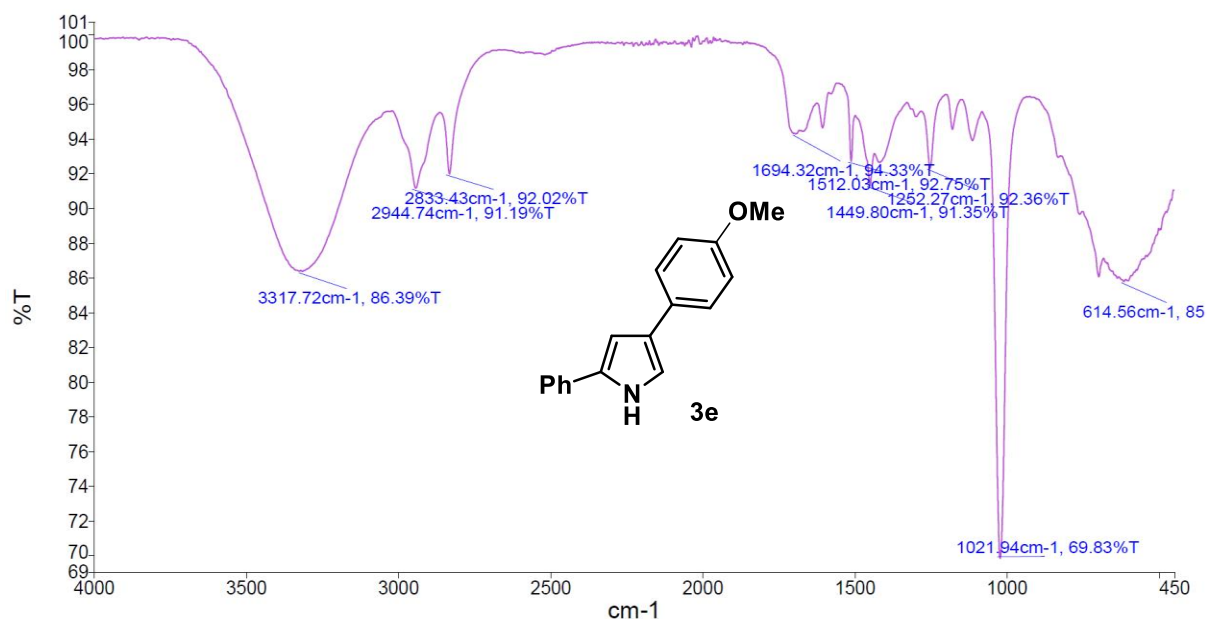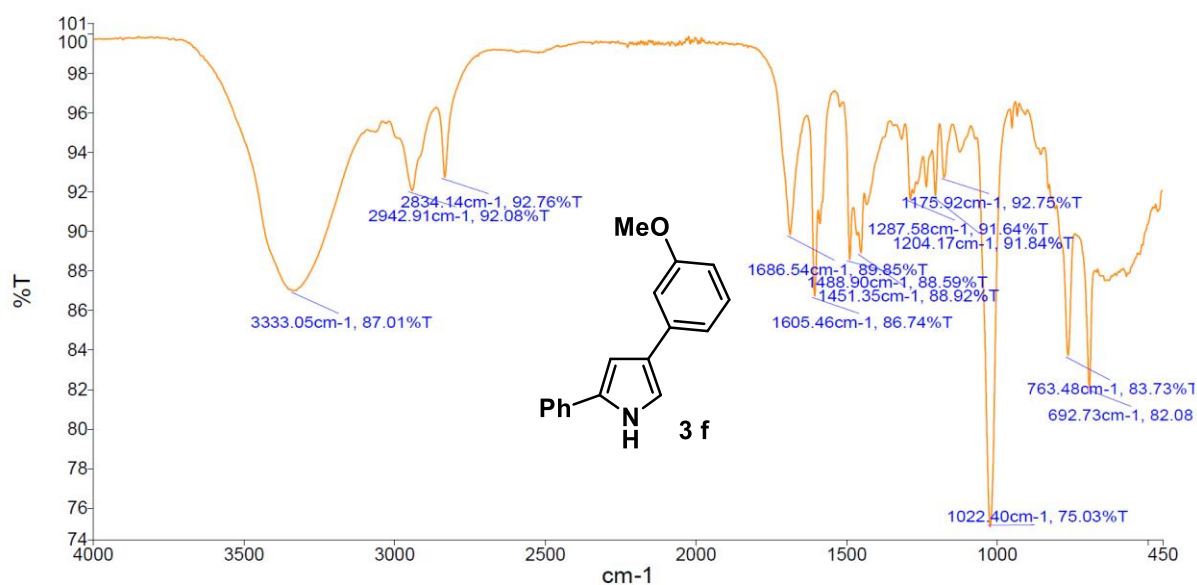

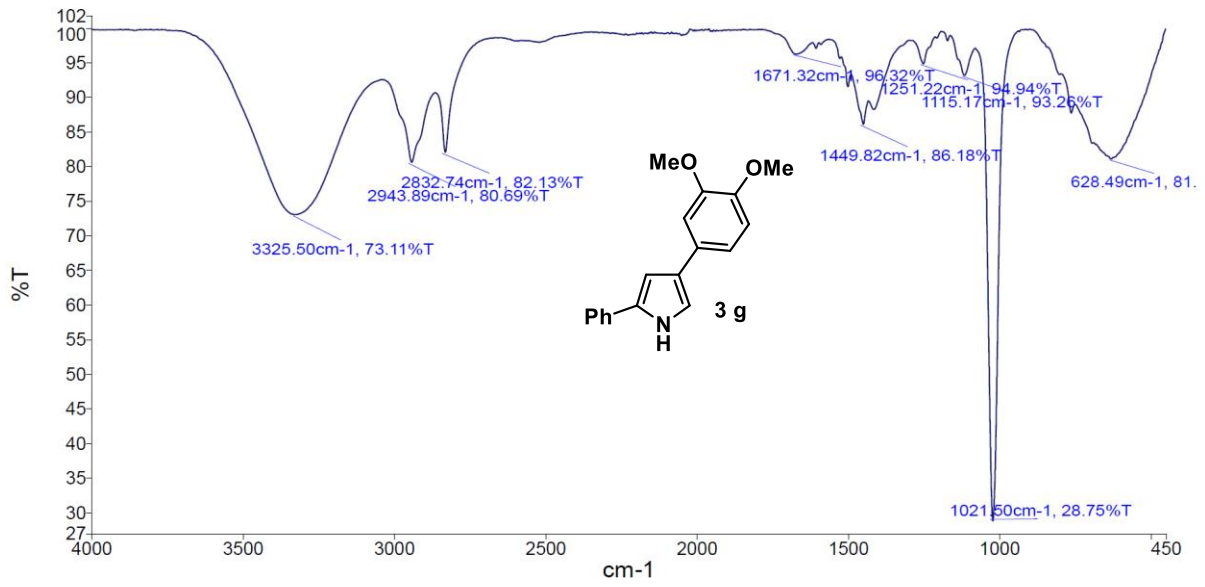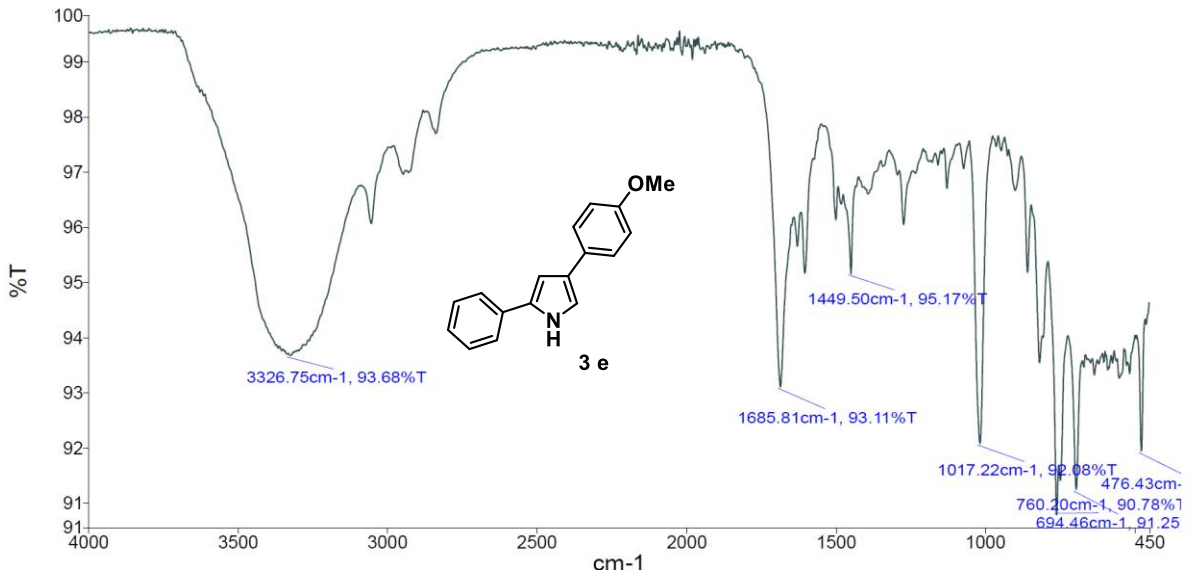

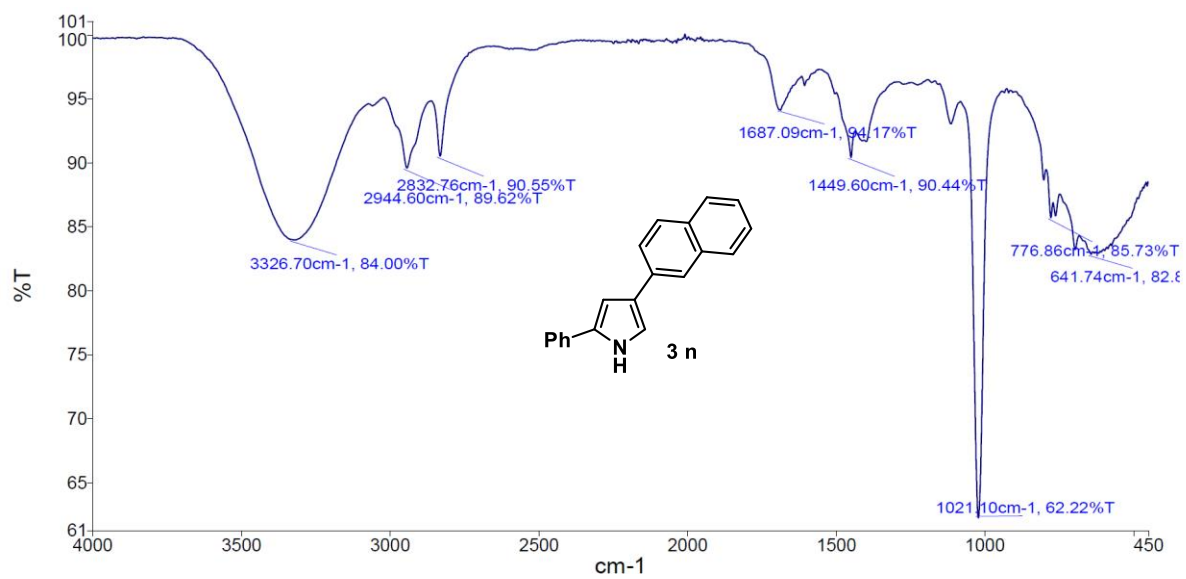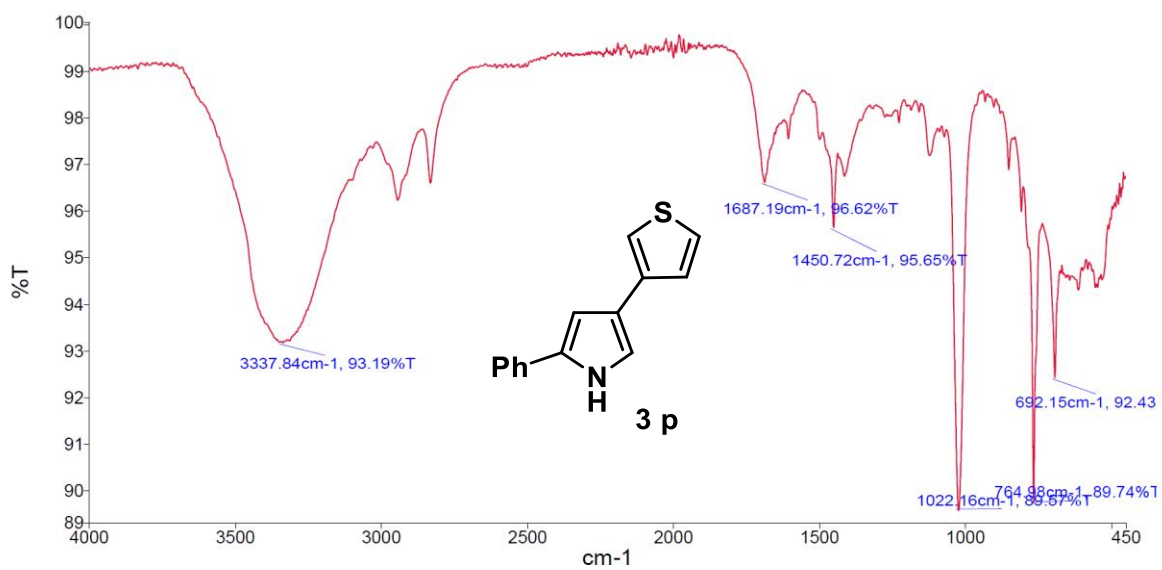

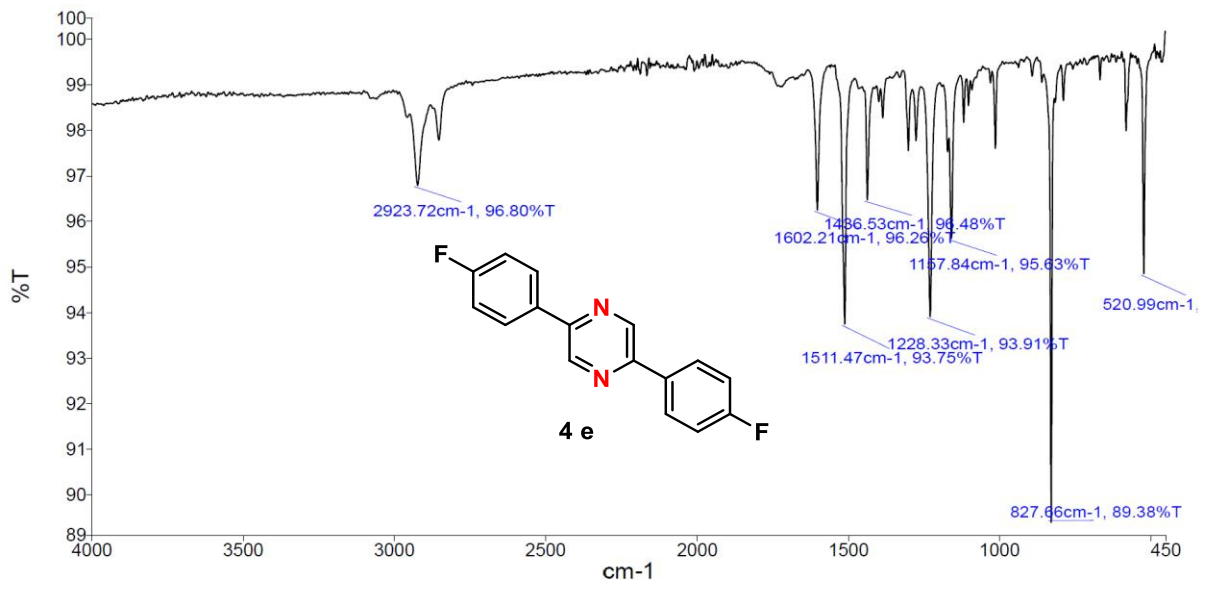

Supplement: d4cc03595j1.pdf [file d4cc03595j1.pdf]
